# Supplementary material
Source: PubMed Central journal article supplement (PMC8041212)
Supplement: NIHMS1682858-supplement-SI.pdf [file NIHMS1682858-supplement-SI.pdf]

# Targeting Trimeric and Tetrameric Proanthocyanidins from *Cinnamomum verum* Bark as Bioactives for Dental Therapies

Joo-Won Nam,<sup>†,¶</sup> Rasika S. Phansalkar,<sup>†</sup> David C. Lankin,<sup>†</sup> James B. McAlpine,<sup>†,‡</sup> Ariene A. Leme-Kraus,<sup>§</sup> Ana K. Bedran-Russo,<sup>§,⊥</sup> Shao-Nong Chen,<sup>†,‡</sup> and Guido F. Pauli<sup>\*,†,‡</sup>

<sup>†</sup>Department of Pharmaceutical Sciences, Program for Collaborative Research in the Pharmaceutical Sciences (PCRPS), and <sup>‡</sup>Institute for Tuberculosis Research, College of Pharmacy, University of Illinois at Chicago, Chicago, IL 60612, United States

<sup>§</sup>Department of Restorative Dentistry, College of Dentistry, University of Illinois at Chicago, Chicago, IL 60612, United States

<sup>¶</sup>College of Pharmacy, Yeungnam University, Gyeongsan, Gyeongbuk 712-749, Korea

<sup>⊥</sup>Department of General Dental Sciences, School of Dentistry, Marquette University, Milwaukee, WI 53233, United States

## ■ SUPPORTING INFORMATION

## TABLE OF CONTENTS

page

|             |                                                                                                        |     |
|-------------|--------------------------------------------------------------------------------------------------------|-----|
| <b>S1.</b>  | <sup>1</sup> H NMR (900 MHz, CD <sub>3</sub> OD, 298 K) of <b>1</b>                                    | S3  |
| <b>S2.</b>  | DEPTQ-135 NMR (225 MHz, CD <sub>3</sub> OD, 298 K) of <b>1</b>                                         | S4  |
| <b>S3.</b>  | <sup>1</sup> H- <sup>1</sup> H COSY NMR (CD <sub>3</sub> OD, 298 K) of <b>1</b>                        | S5  |
| <b>S4.</b>  | <sup>1</sup> H- <sup>1</sup> H ROESY NMR (CD <sub>3</sub> OD, 298 K) of <b>1</b>                       | S6  |
| <b>S5.</b>  | <sup>1</sup> H- <sup>13</sup> C HSQC NMR (CD <sub>3</sub> OD, 298 K) of <b>1</b>                       | S8  |
| <b>S6.</b>  | <sup>1</sup> H- <sup>13</sup> C HMBC NMR (CD <sub>3</sub> OD, 298 K) of <b>1</b>                       | S9  |
| <b>S7.</b>  | <sup>1</sup> H NMR (900 MHz, CD <sub>3</sub> OD, 298 K) of <b>2</b>                                    | S10 |
| <b>S8.</b>  | DEPTQ-135 NMR (225 MHz, CD <sub>3</sub> OD, 298 K) of <b>2</b>                                         | S11 |
| <b>S9.</b>  | <sup>1</sup> H- <sup>1</sup> H COSY NMR (CD <sub>3</sub> OD, 298 K) of <b>2</b>                        | S12 |
| <b>S10.</b> | <sup>1</sup> H- <sup>1</sup> H ROESY NMR (CD <sub>3</sub> OD, 298 K) of <b>2</b>                       | S13 |
| <b>S11.</b> | <sup>1</sup> H- <sup>13</sup> C HSQC NMR (CD <sub>3</sub> OD, 298 K) of <b>2</b>                       | S14 |
| <b>S12.</b> | <sup>1</sup> H- <sup>13</sup> C HMBC NMR (CD <sub>3</sub> OD, 298 K) of <b>2</b>                       | S15 |
| <b>S13.</b> | <sup>1</sup> H NMR (900 MHz, CD <sub>3</sub> OD, 298 K) of <b>3</b>                                    | S16 |
| <b>S14.</b> | DEPTQ-135 NMR (225 MHz, CD <sub>3</sub> OD, 298 K) of <b>3</b>                                         | S17 |
| <b>S15.</b> | <sup>1</sup> H- <sup>1</sup> H COSY NMR (CD <sub>3</sub> OD, 298 K) of <b>3</b>                        | S18 |
| <b>S16.</b> | <sup>1</sup> H- <sup>1</sup> H ROESY NMR (CD <sub>3</sub> OD, 298 K) of <b>3</b>                       | S19 |
| <b>S17.</b> | <sup>1</sup> H- <sup>13</sup> C HSQC NMR (CD <sub>3</sub> OD, 298 K) of <b>3</b>                       | S20 |
| <b>S18.</b> | <sup>1</sup> H- <sup>13</sup> C HMBC NMR (CD <sub>3</sub> OD, 298 K) of <b>3</b>                       | S21 |
| <b>S19.</b> | The <sup>1</sup> H NMR fingerprint of <b>1</b> (PERCH .pms file format).                               | S22 |
| <b>S20.</b> | The <sup>1</sup> H NMR fingerprint of <b>2</b> (PERCH .pms file format).                               | S23 |
| <b>S21.</b> | The <sup>1</sup> H NMR fingerprint of the major conformer of <b>3</b> (PERCH .pms file format).        | S24 |
| <b>S22.</b> | The <sup>1</sup> H NMR fingerprint of the minor conformer of <b>3</b> (PERCH .pms file format).        | S25 |
| <b>S23.</b> | The <sup>1</sup> H NMR fingerprint of the mixture of <b>3</b> (PERCH .pms file format).                | S26 |
| <b>S24.</b> | The CD spectra of compounds <b>1-3</b>                                                                 | S28 |
| <b>S25.</b> | <sup>1</sup> H Comparison of NMR spectra showing that deuterium exchange reaction occurred in <b>2</b> | S29 |
| <b>S26.</b> | Calibration of NMR temperature                                                                         | S30 |
| <b>S27.</b> | Calculation of the purity of <b>1</b> by qHNMR using 100% method                                       | S31 |
| <b>S28.</b> | Calculation of the purity of <b>2</b> by qHNMR using 100% method                                       | S32 |
| <b>S29.</b> | Calculation of the purity of <b>3</b> by qHNMR using 100% method                                       | S33 |

S1.  $^1\text{H}$  NMR (900 MHz,  $\text{CD}_3\text{OD}$ , 298 K) spectrum of **1**.

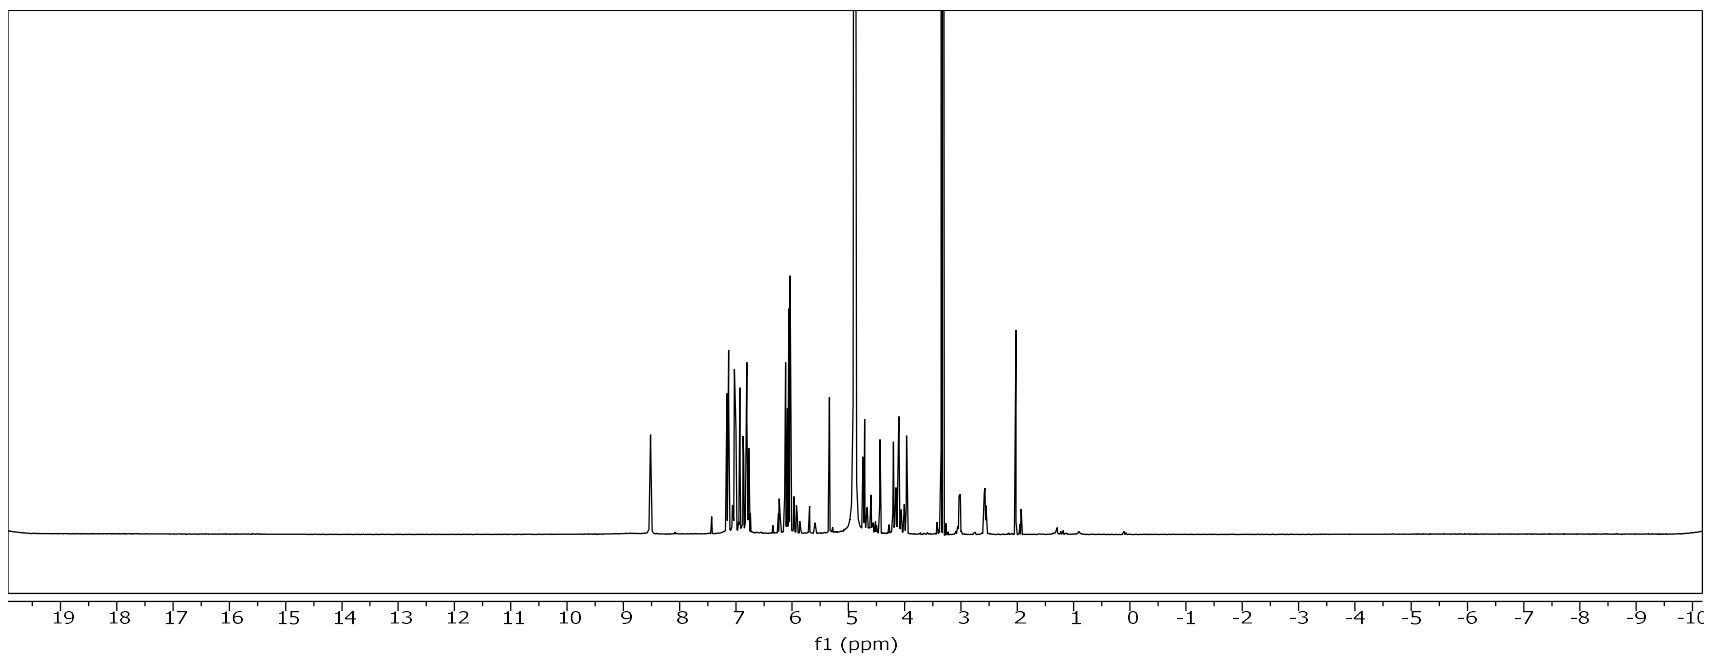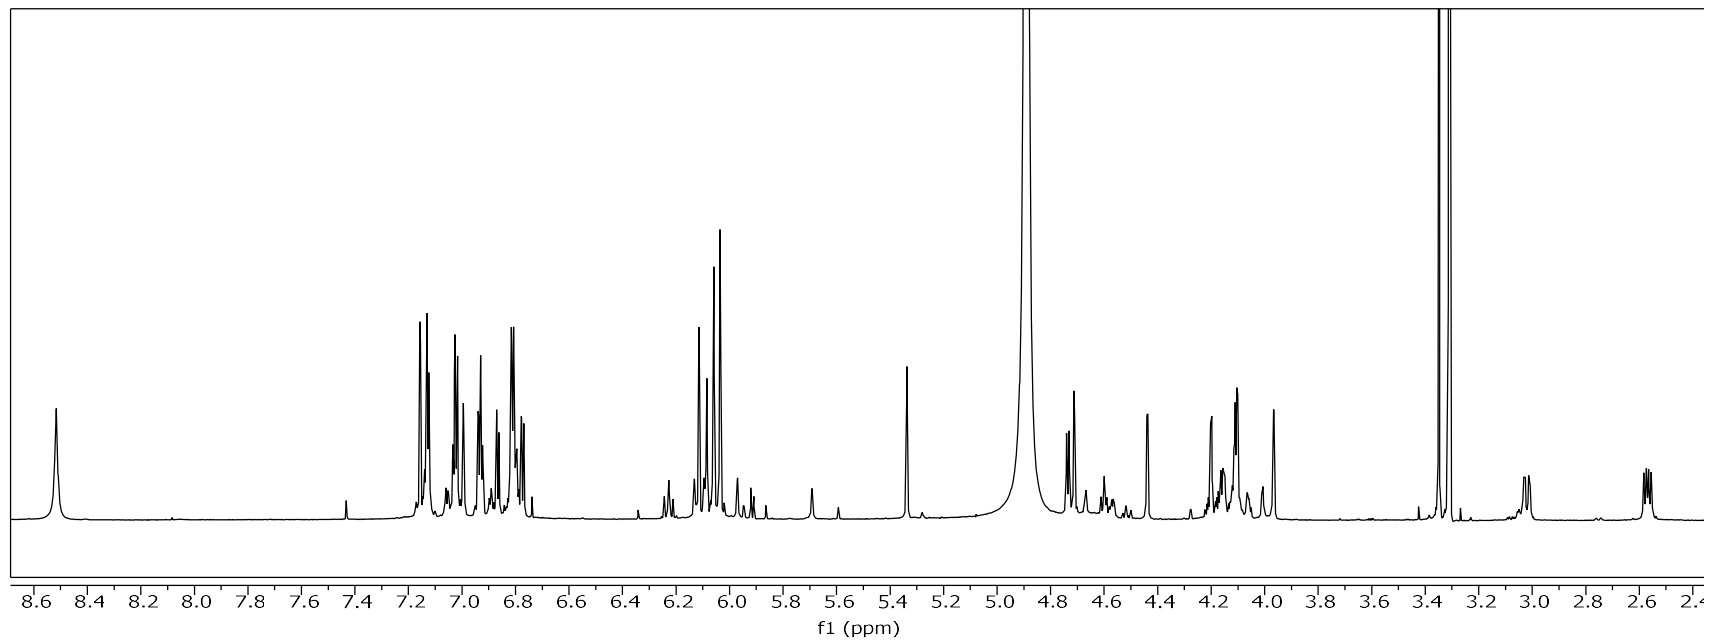

S2. DEPTQ-135 NMR (225 MHz, CD<sub>3</sub>OD, 298 K) spectrum of 1.

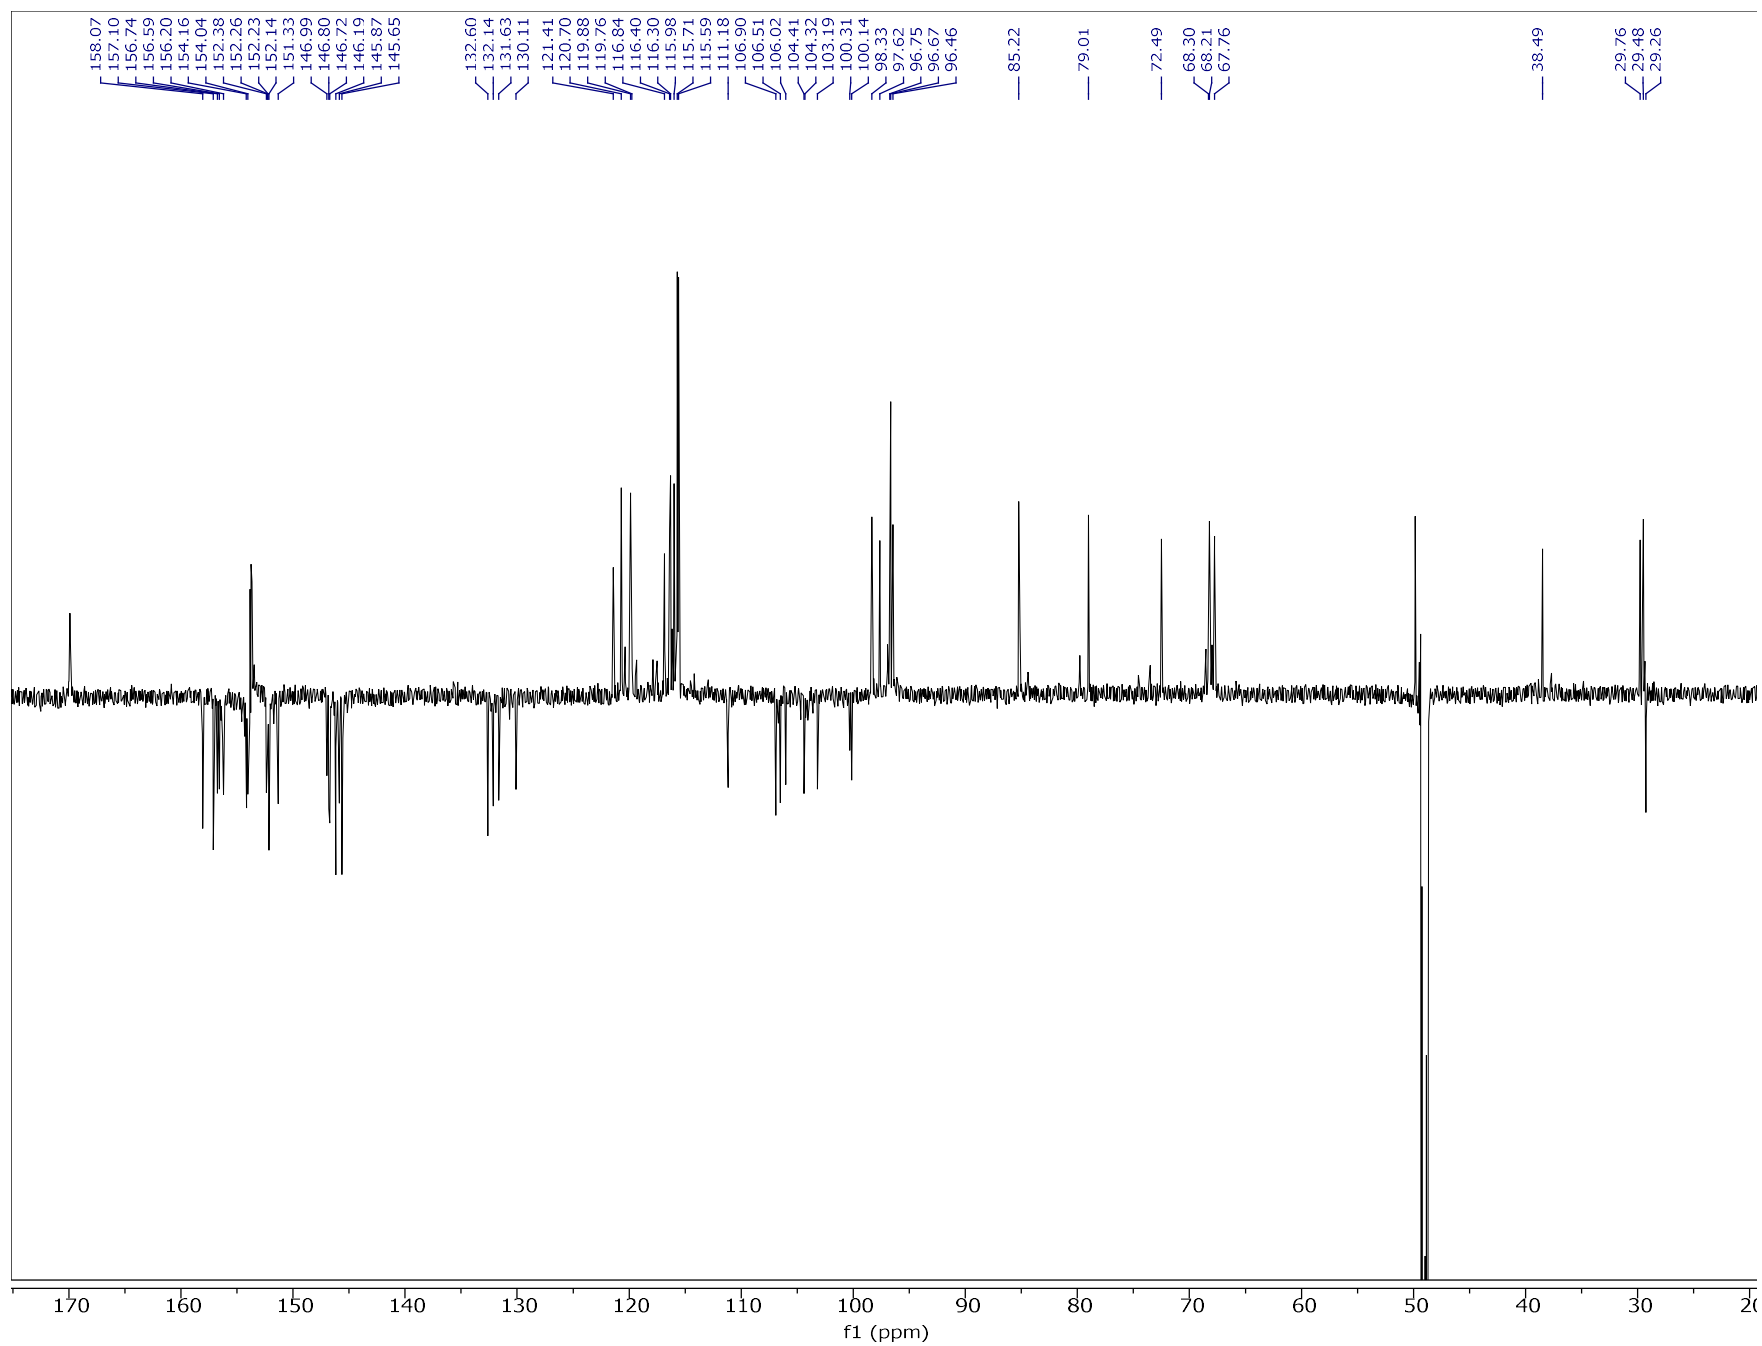

S3.  $^1\text{H}$ - $^1\text{H}$  COSY NMR spectrum ( $\text{CD}_3\text{OD}$ , 298 K) of **1**.

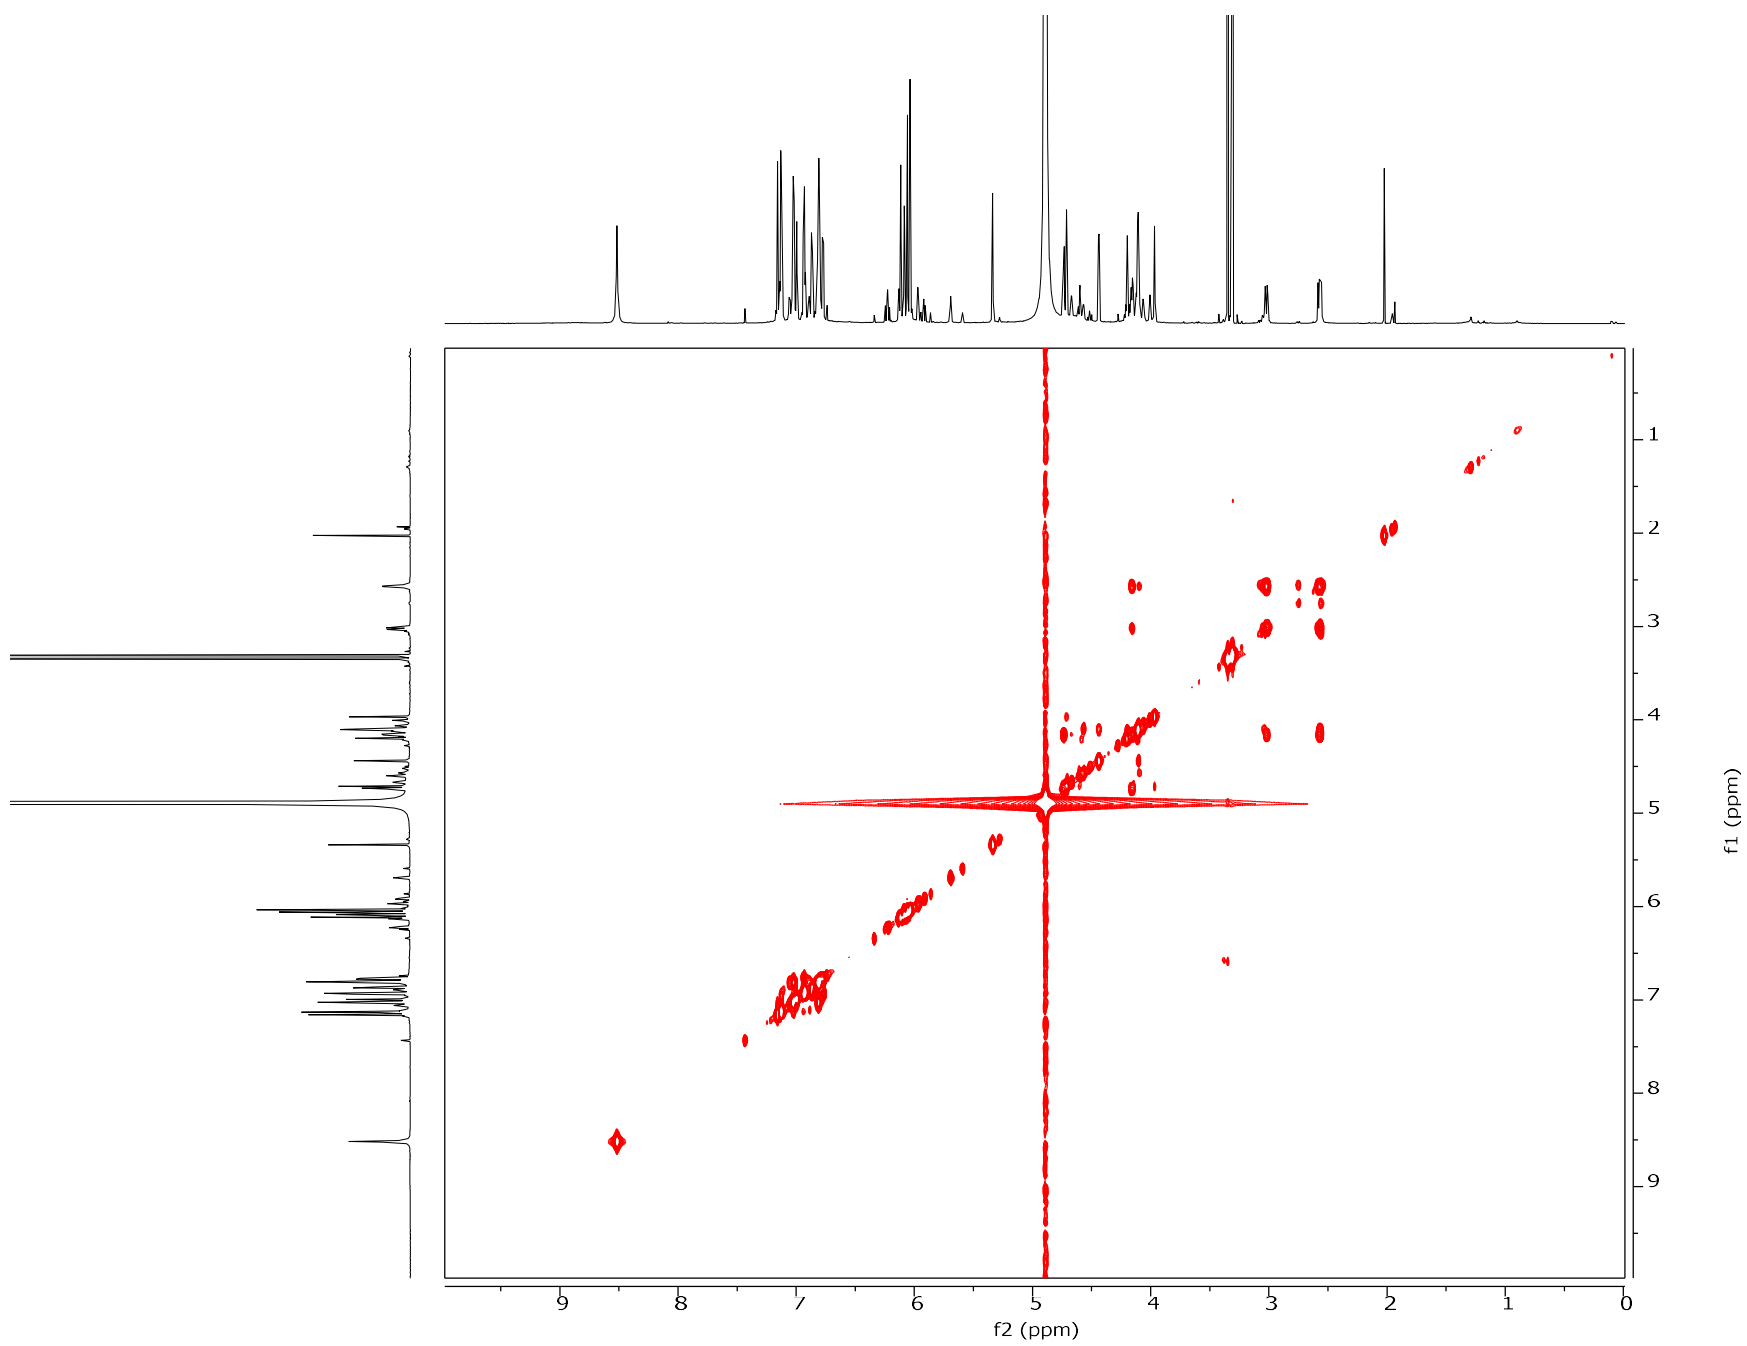

S4.  $^1\text{H}$ - $^1\text{H}$  ROESY NMR spectrum ( $\text{CD}_3\text{OD}$ , 298 K) of **1**.

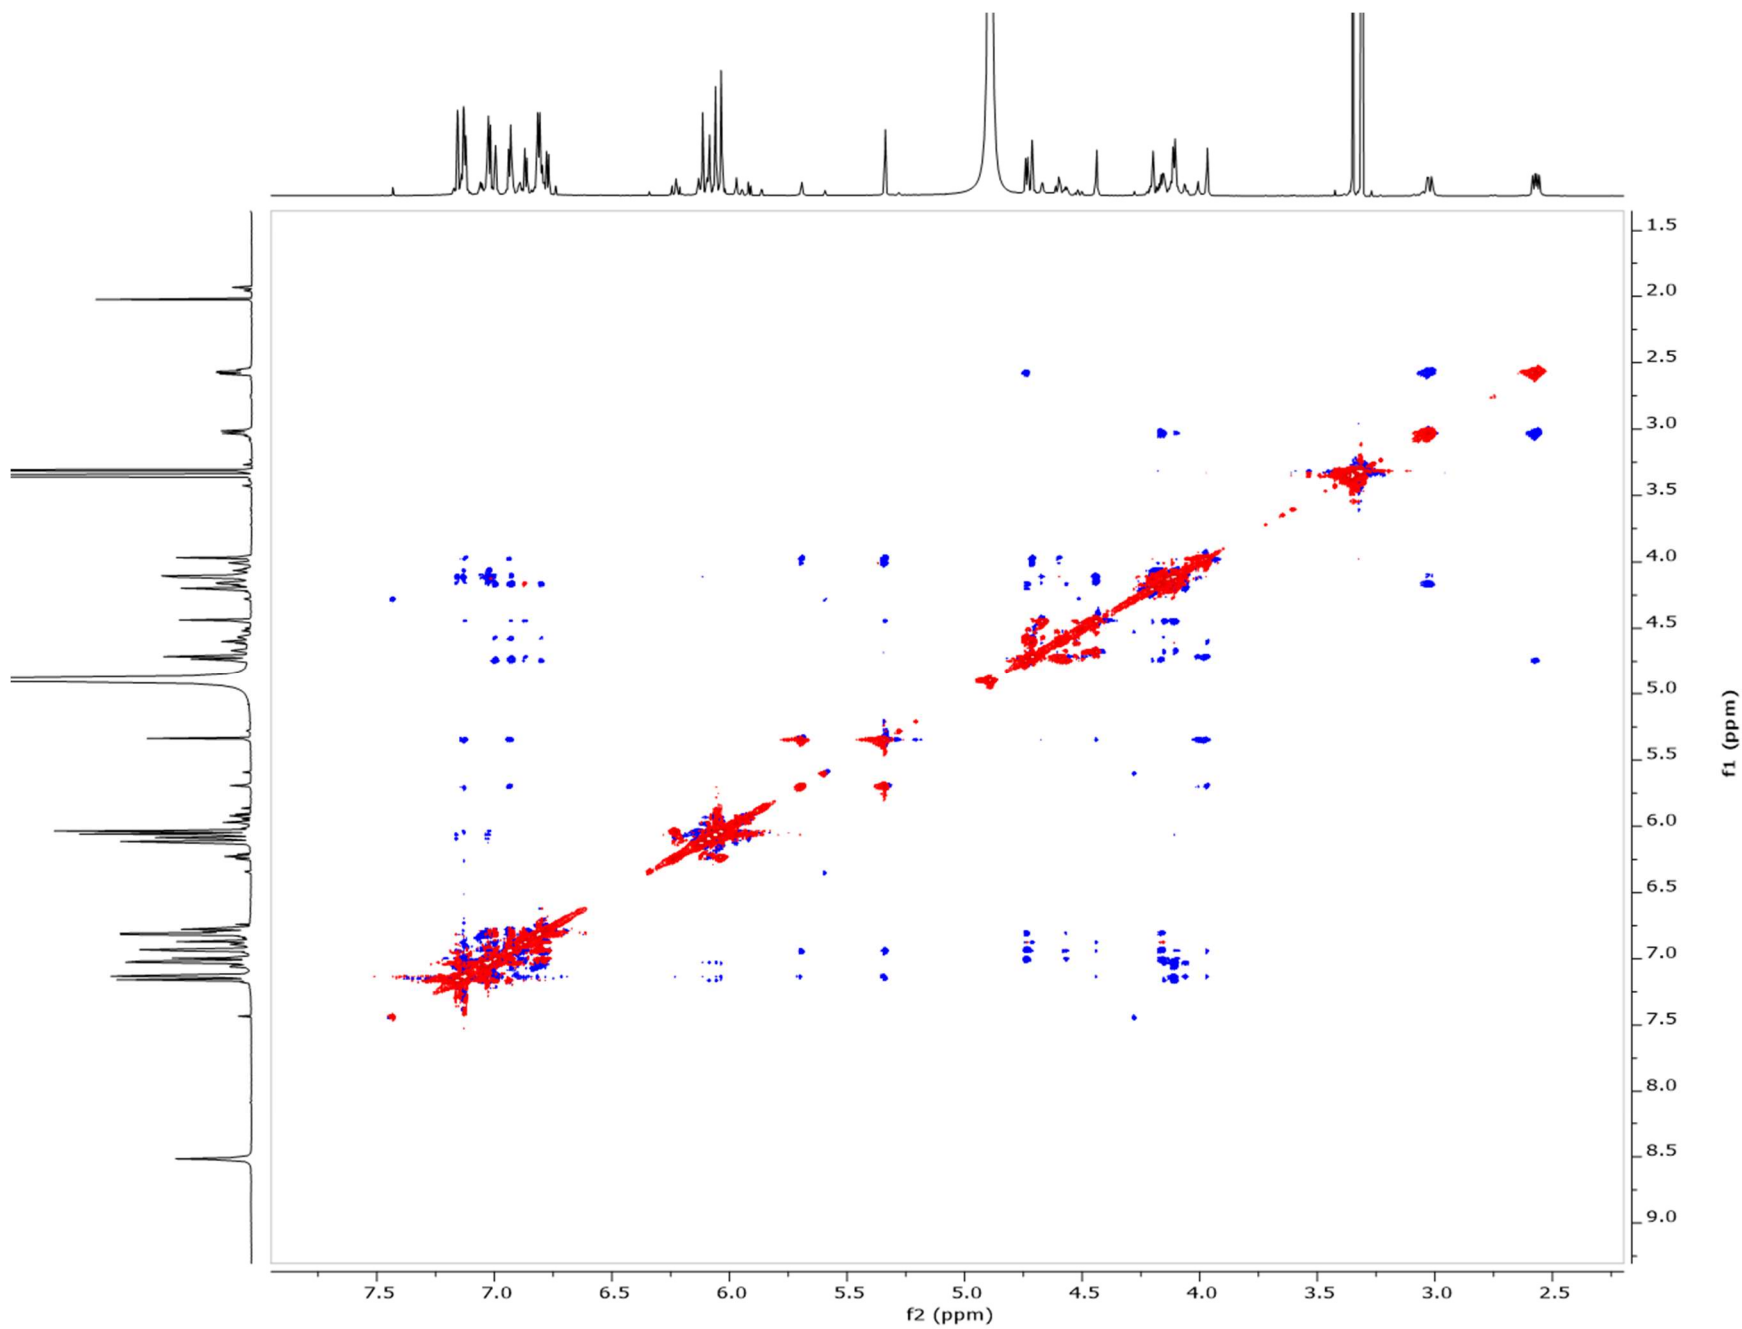

Expansion plots of the  $^1\text{H}$ - $^1\text{H}$  ROESY NMR spectrum of **1**.

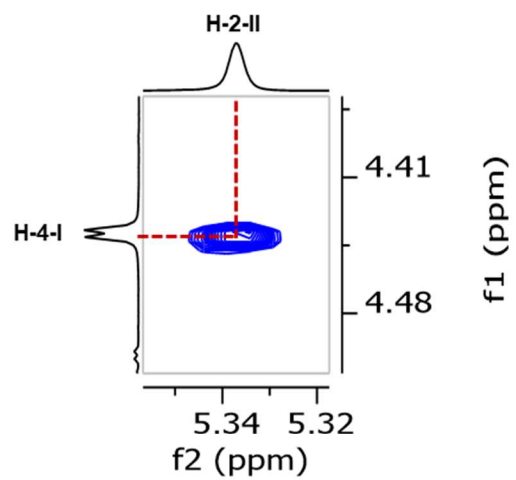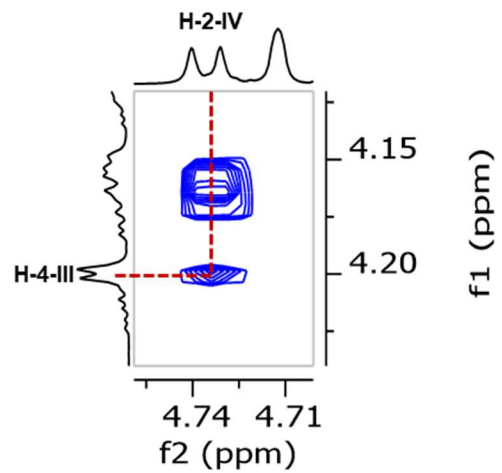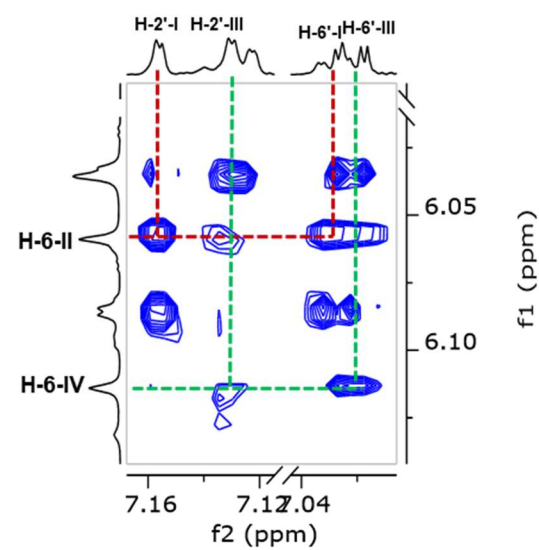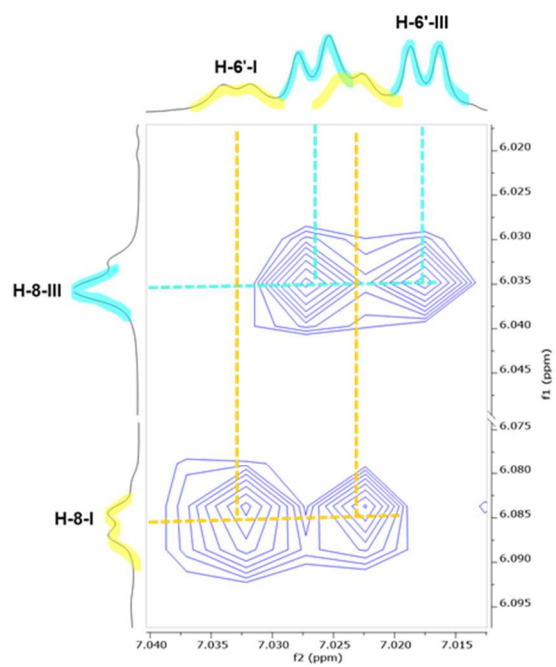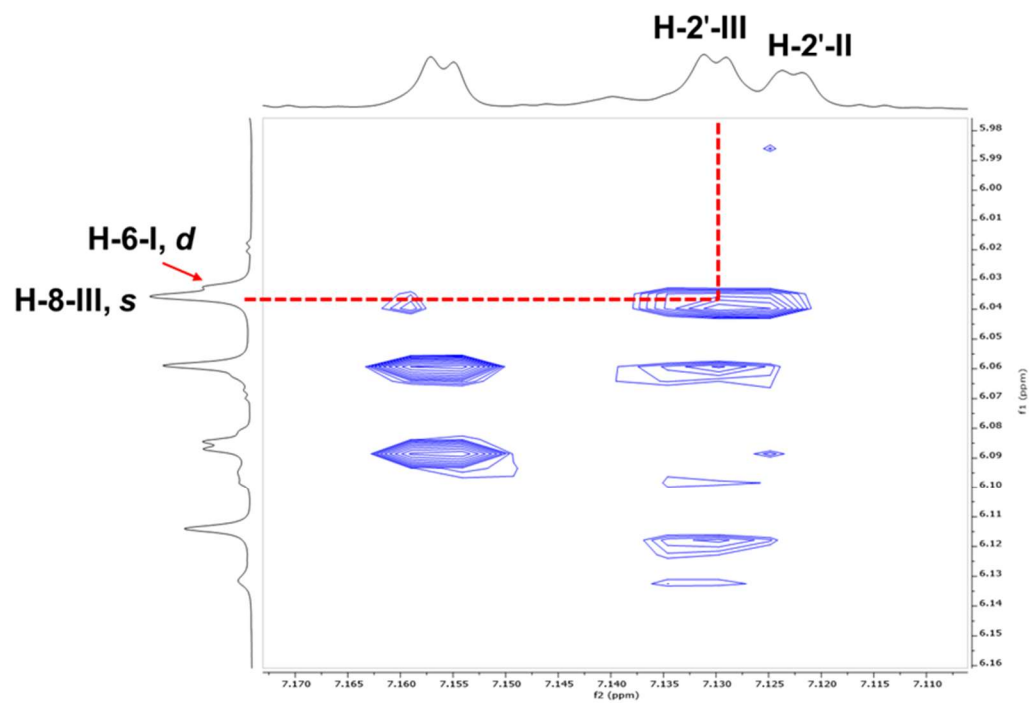

S5.  $^1\text{H}$ - $^{13}\text{C}$  HSQC NMR spectrum ( $\text{CD}_3\text{OD}$ , 298 K) of **1**.

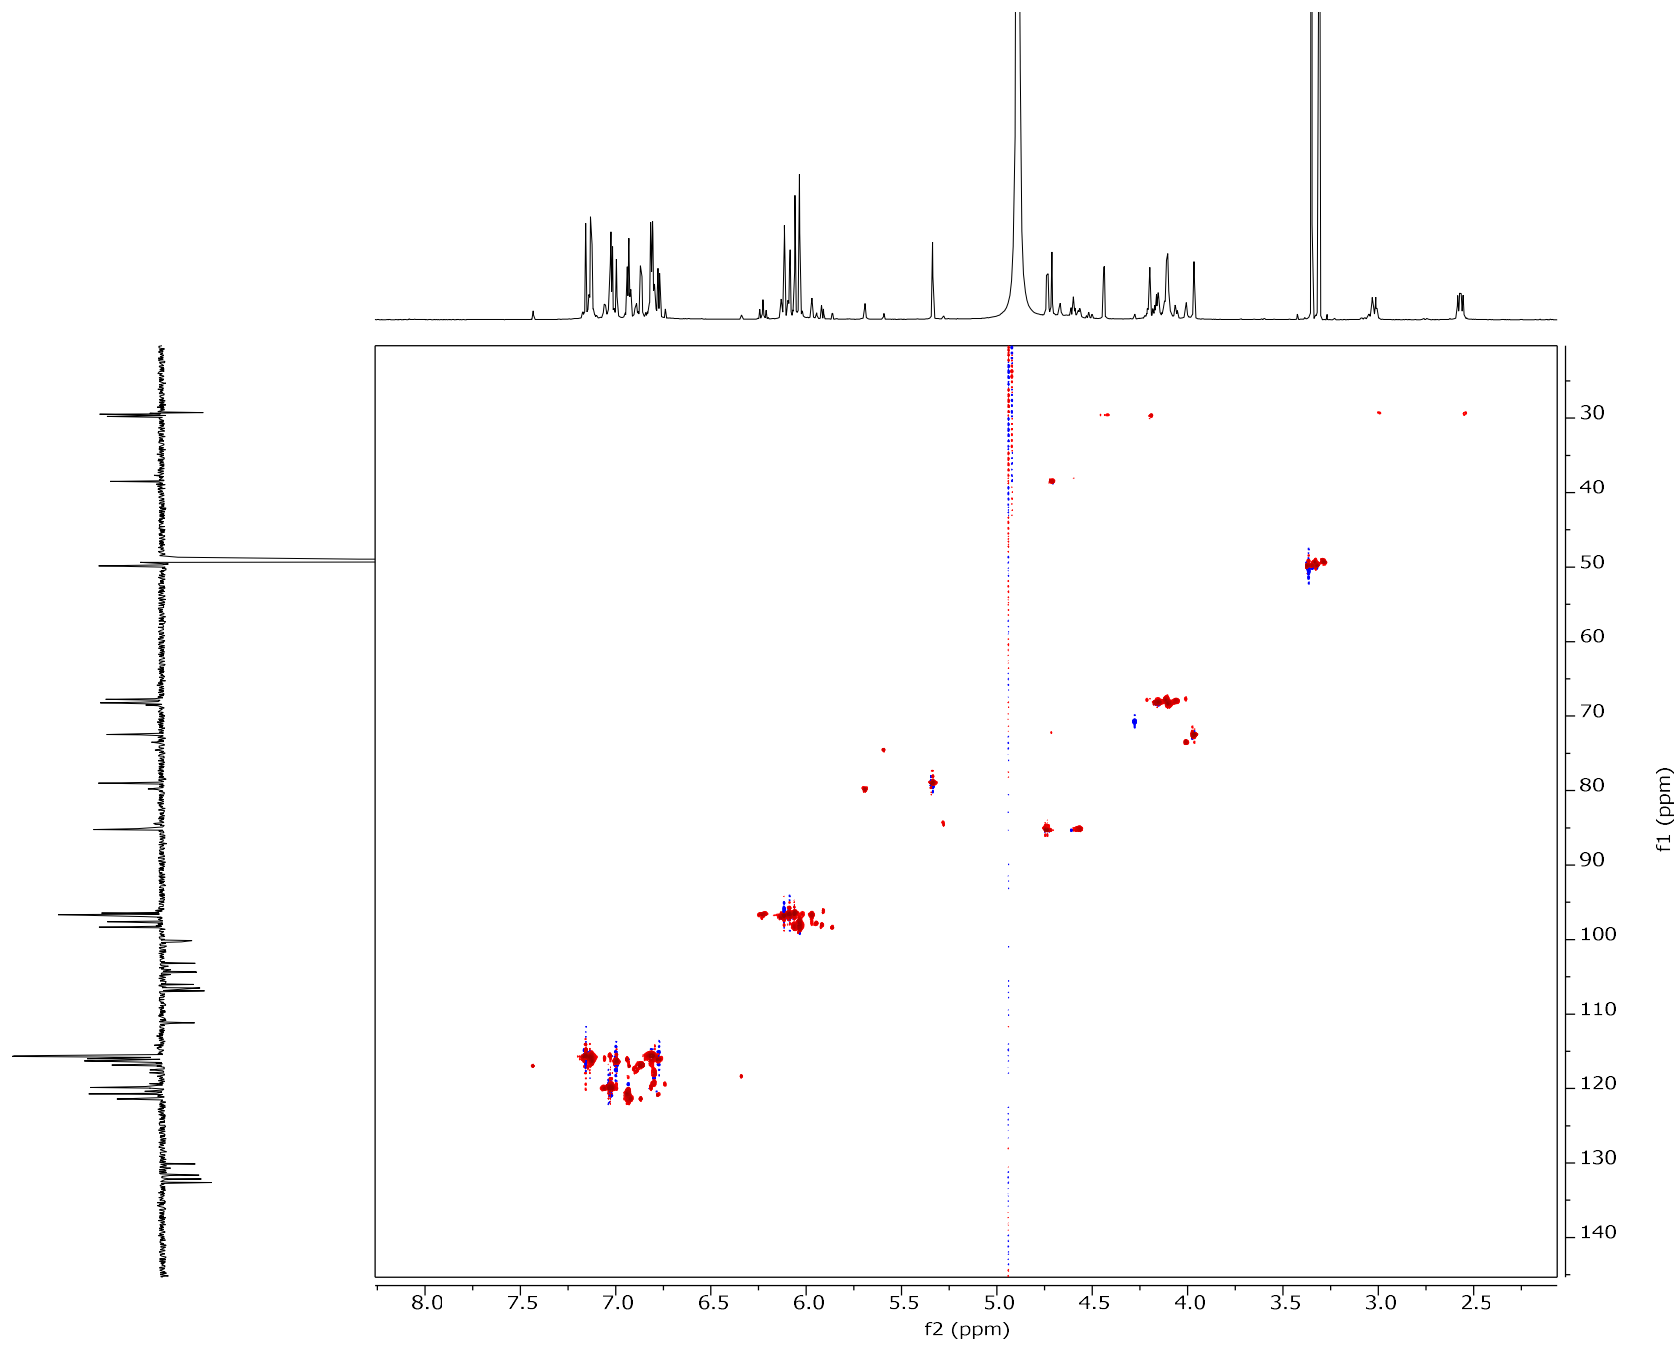



S6.  $^1\text{H}$ - $^{13}\text{C}$  HMBC NMR spectrum ( $\text{CD}_3\text{OD}$ , 298 K) of **1**.

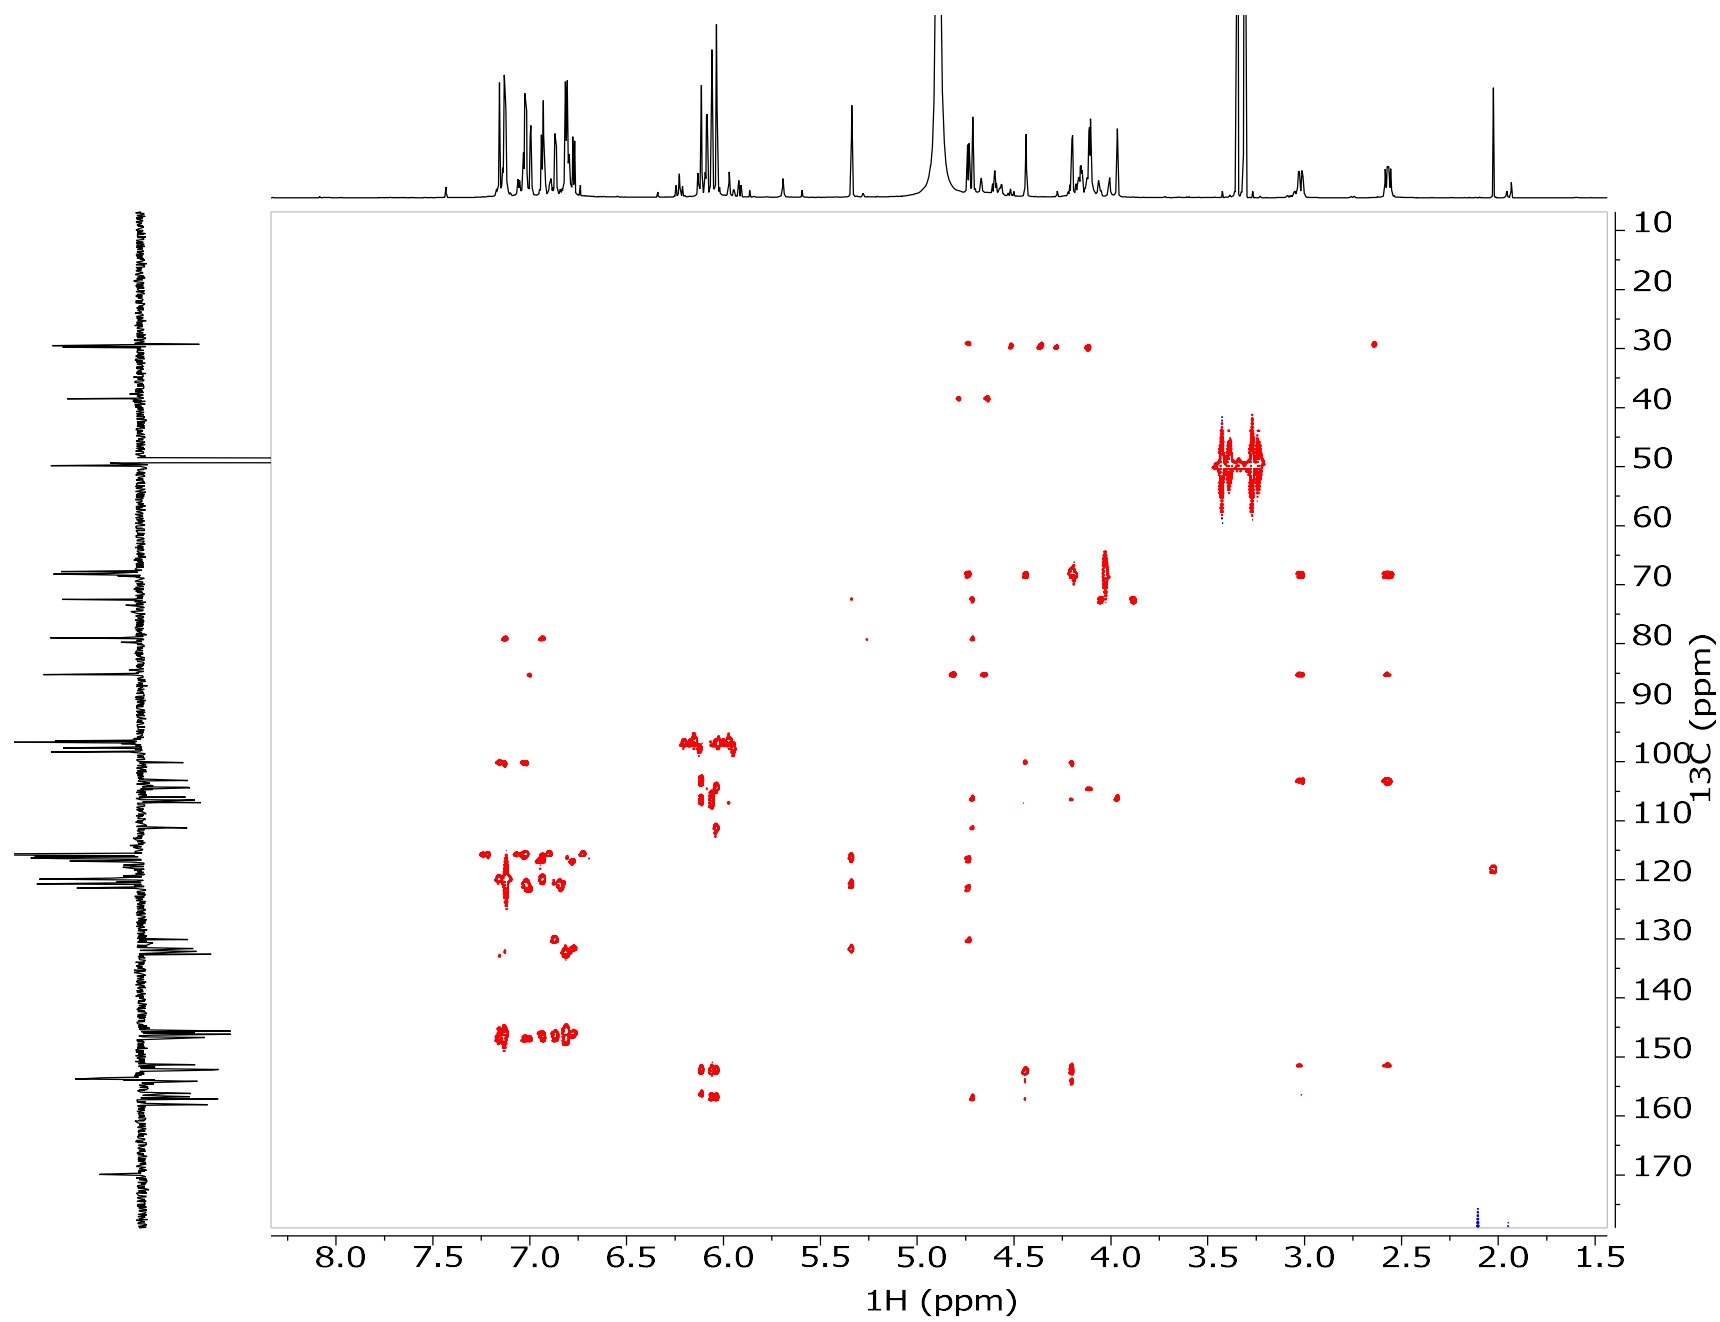

S7.  $^1\text{H}$  NMR spectrum (900 MHz,  $\text{CD}_3\text{OD}$ , 298 K) of 2.

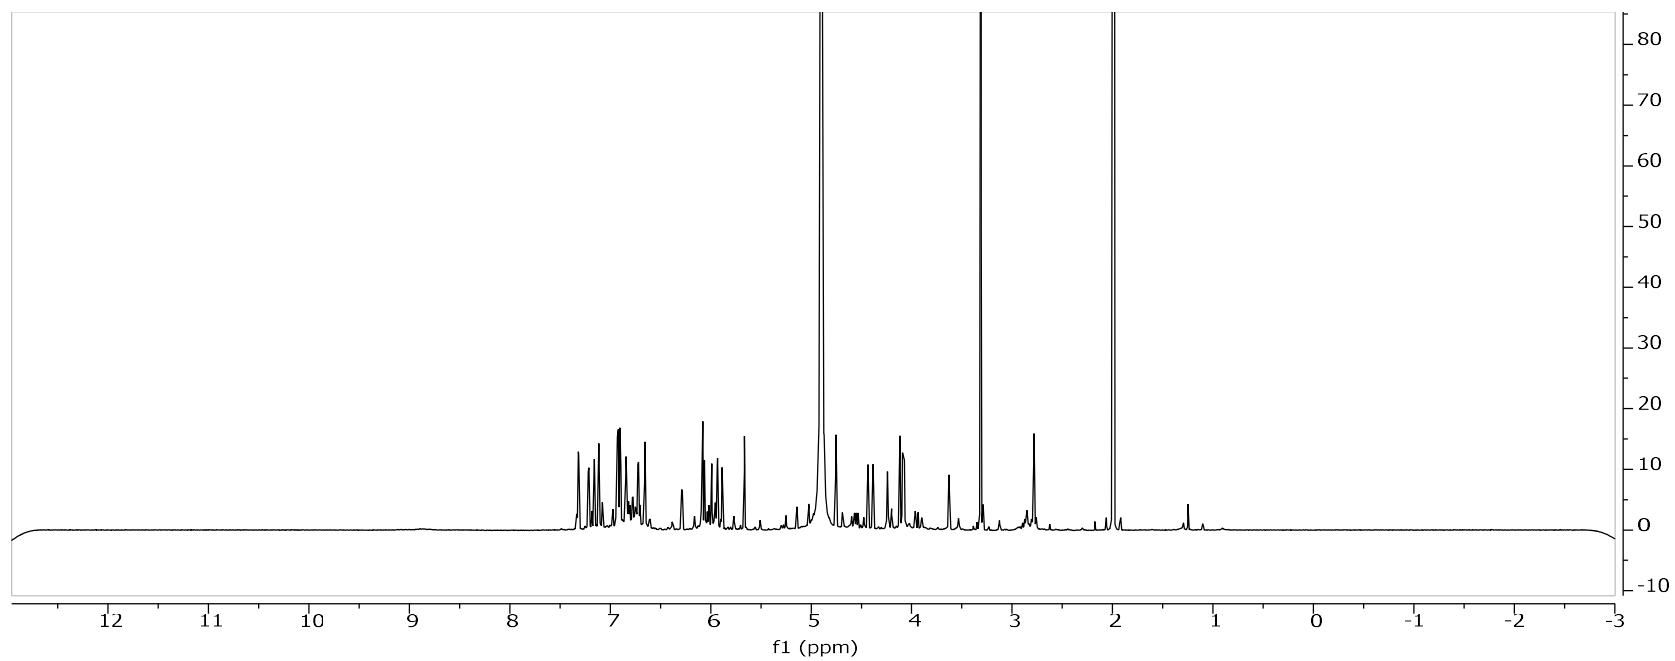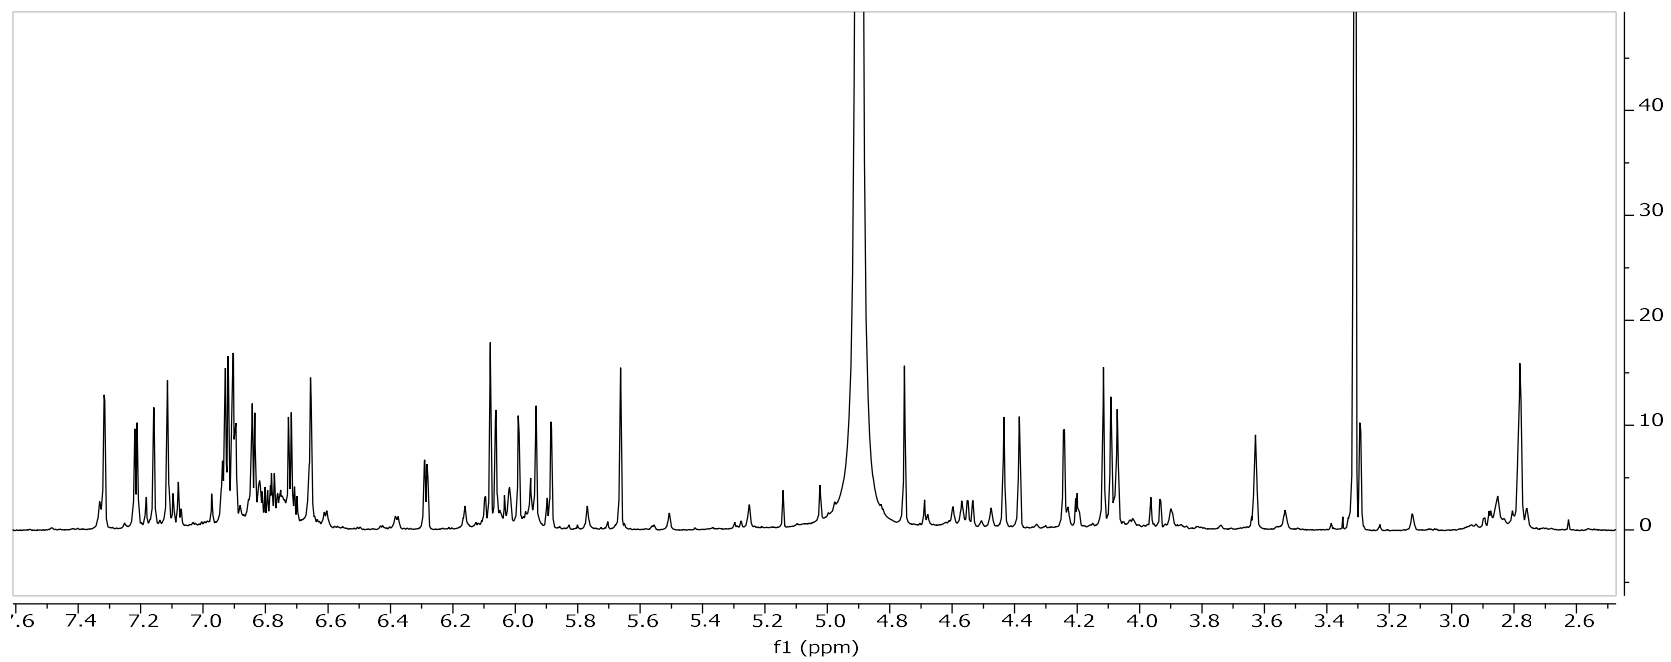

S8. DEPTQ-135 NMR spectrum (225 MHz, CD<sub>3</sub>OD, 298 K) of **2**.

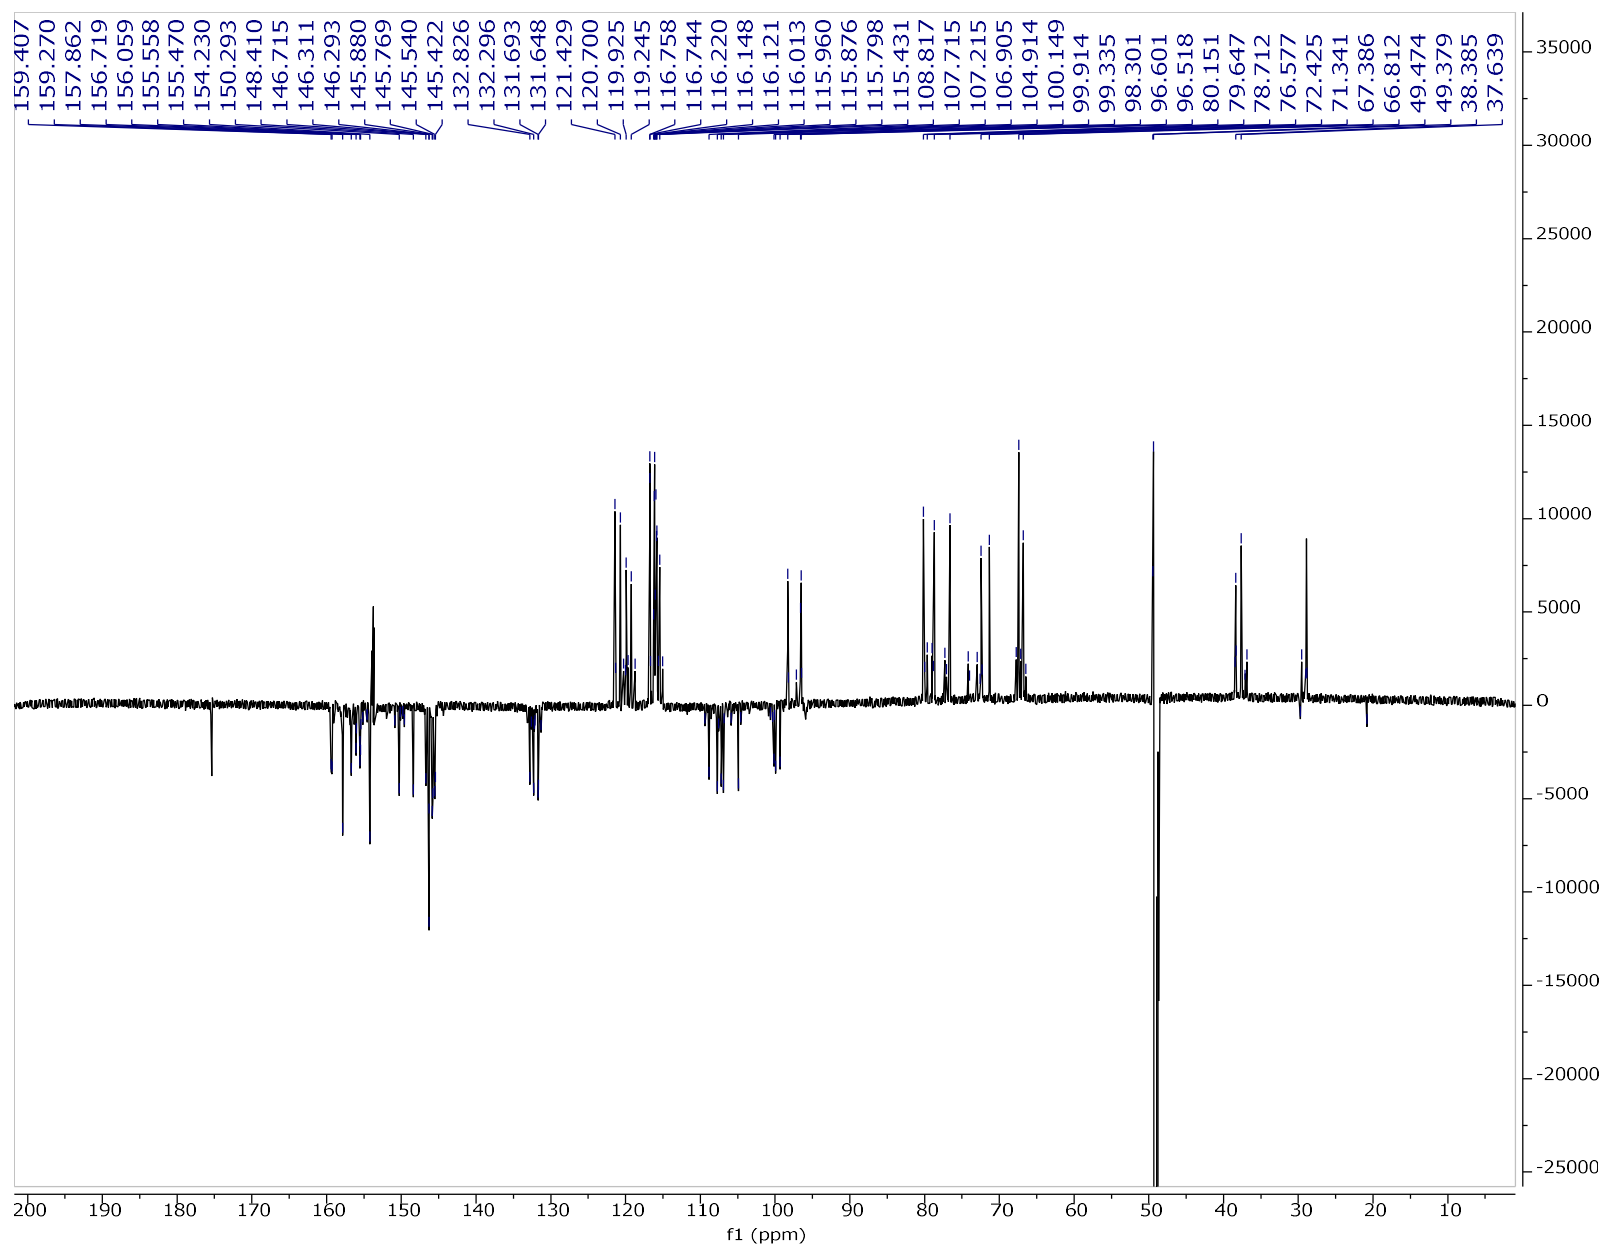

59.  $^1\text{H}$ - $^1\text{H}$  COSY NMR spectrum ( $\text{CD}_3\text{OD}$ , 298 K) of 2.

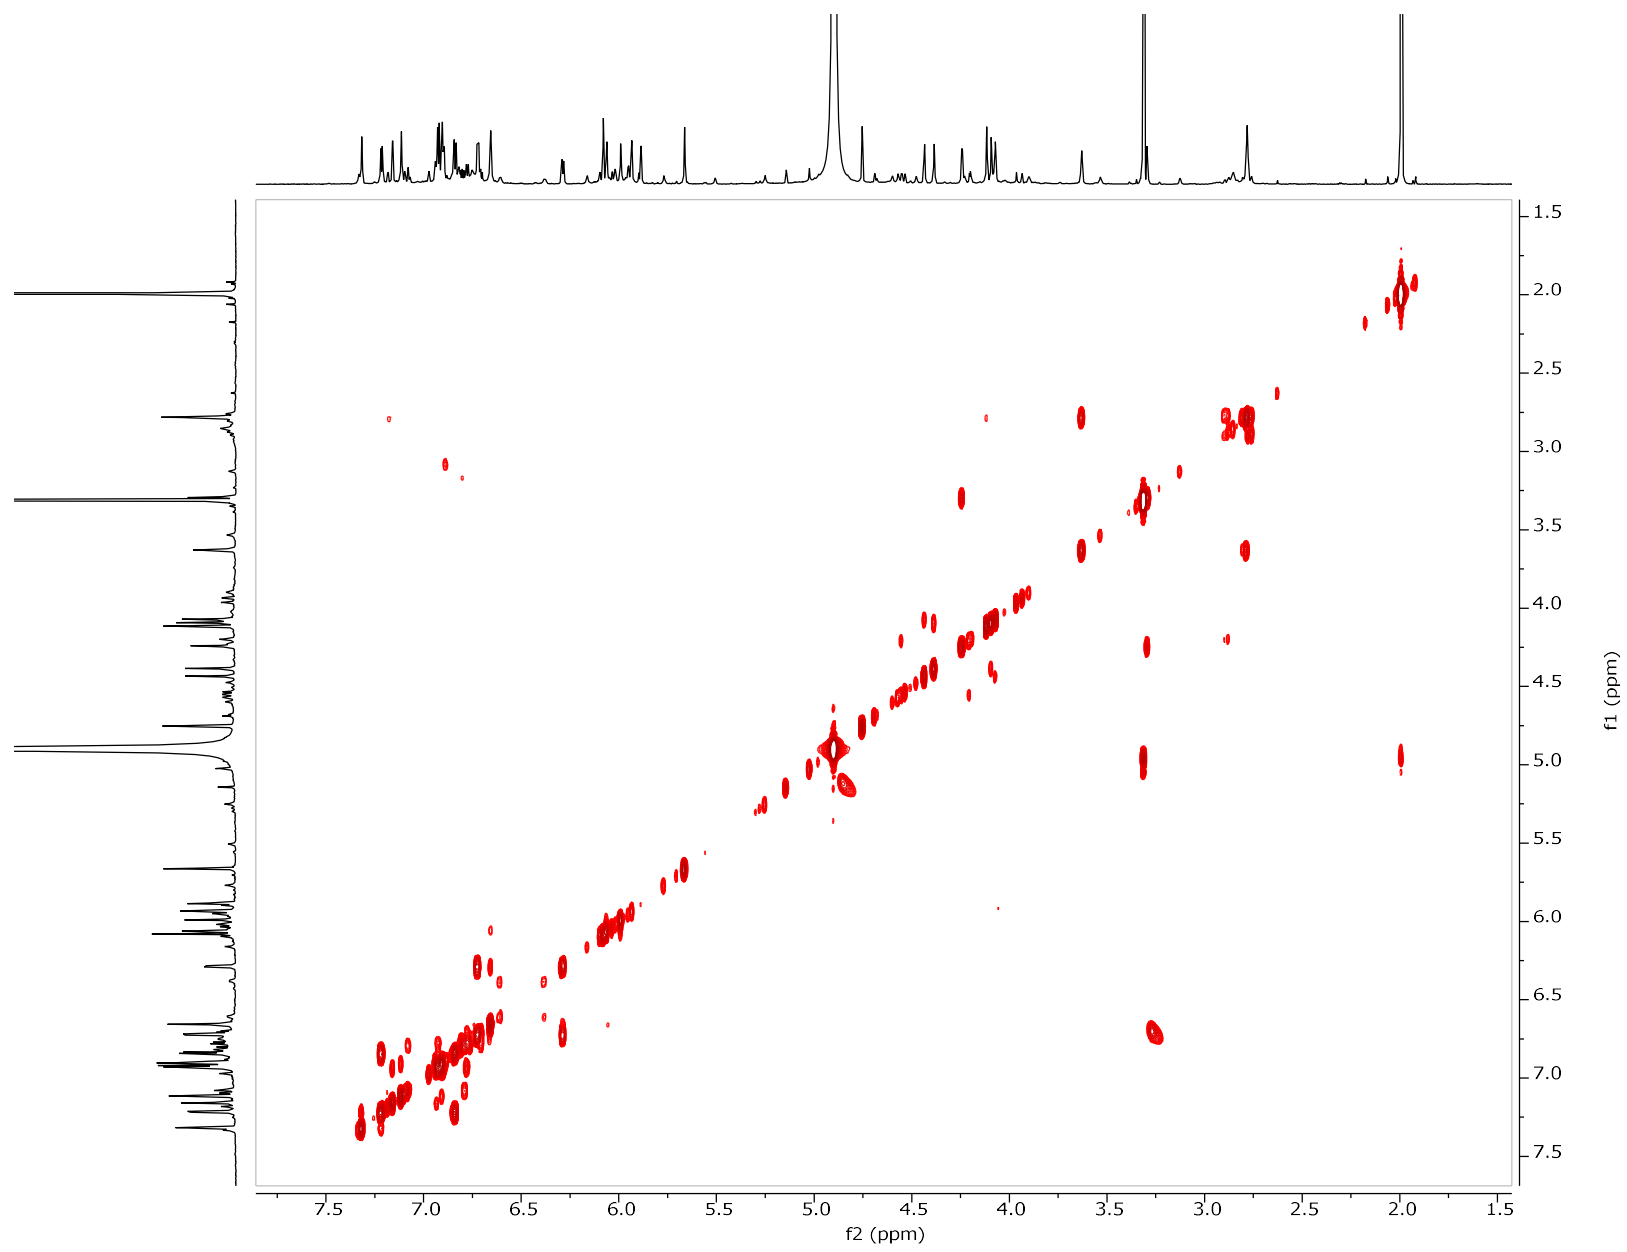

S10.  $^1\text{H}$ - $^1\text{H}$  ROESY NMR spectrum ( $\text{CD}_3\text{OD}$ , 298 K) of **2**.

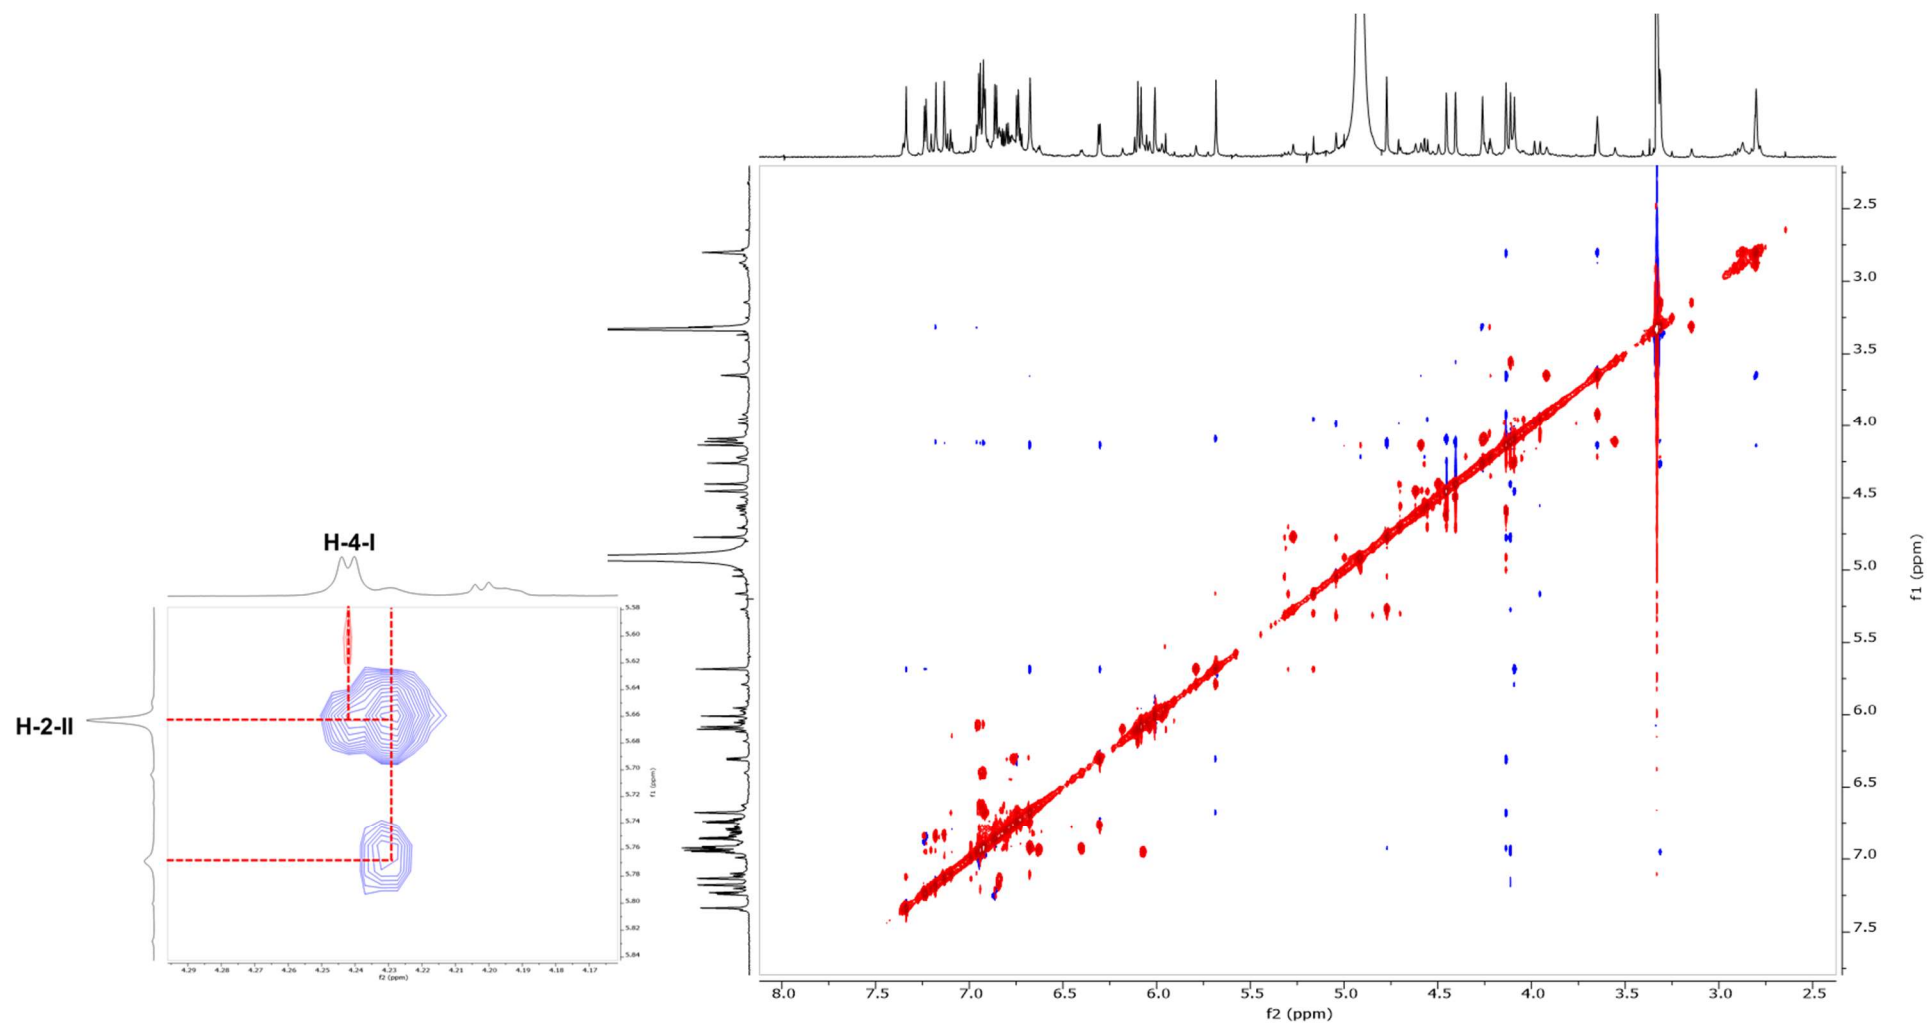

S11.  $^1\text{H}$ - $^{13}\text{C}$  HSQC NMR spectrum ( $\text{CD}_3\text{OD}$ , 298 K) of **2**.

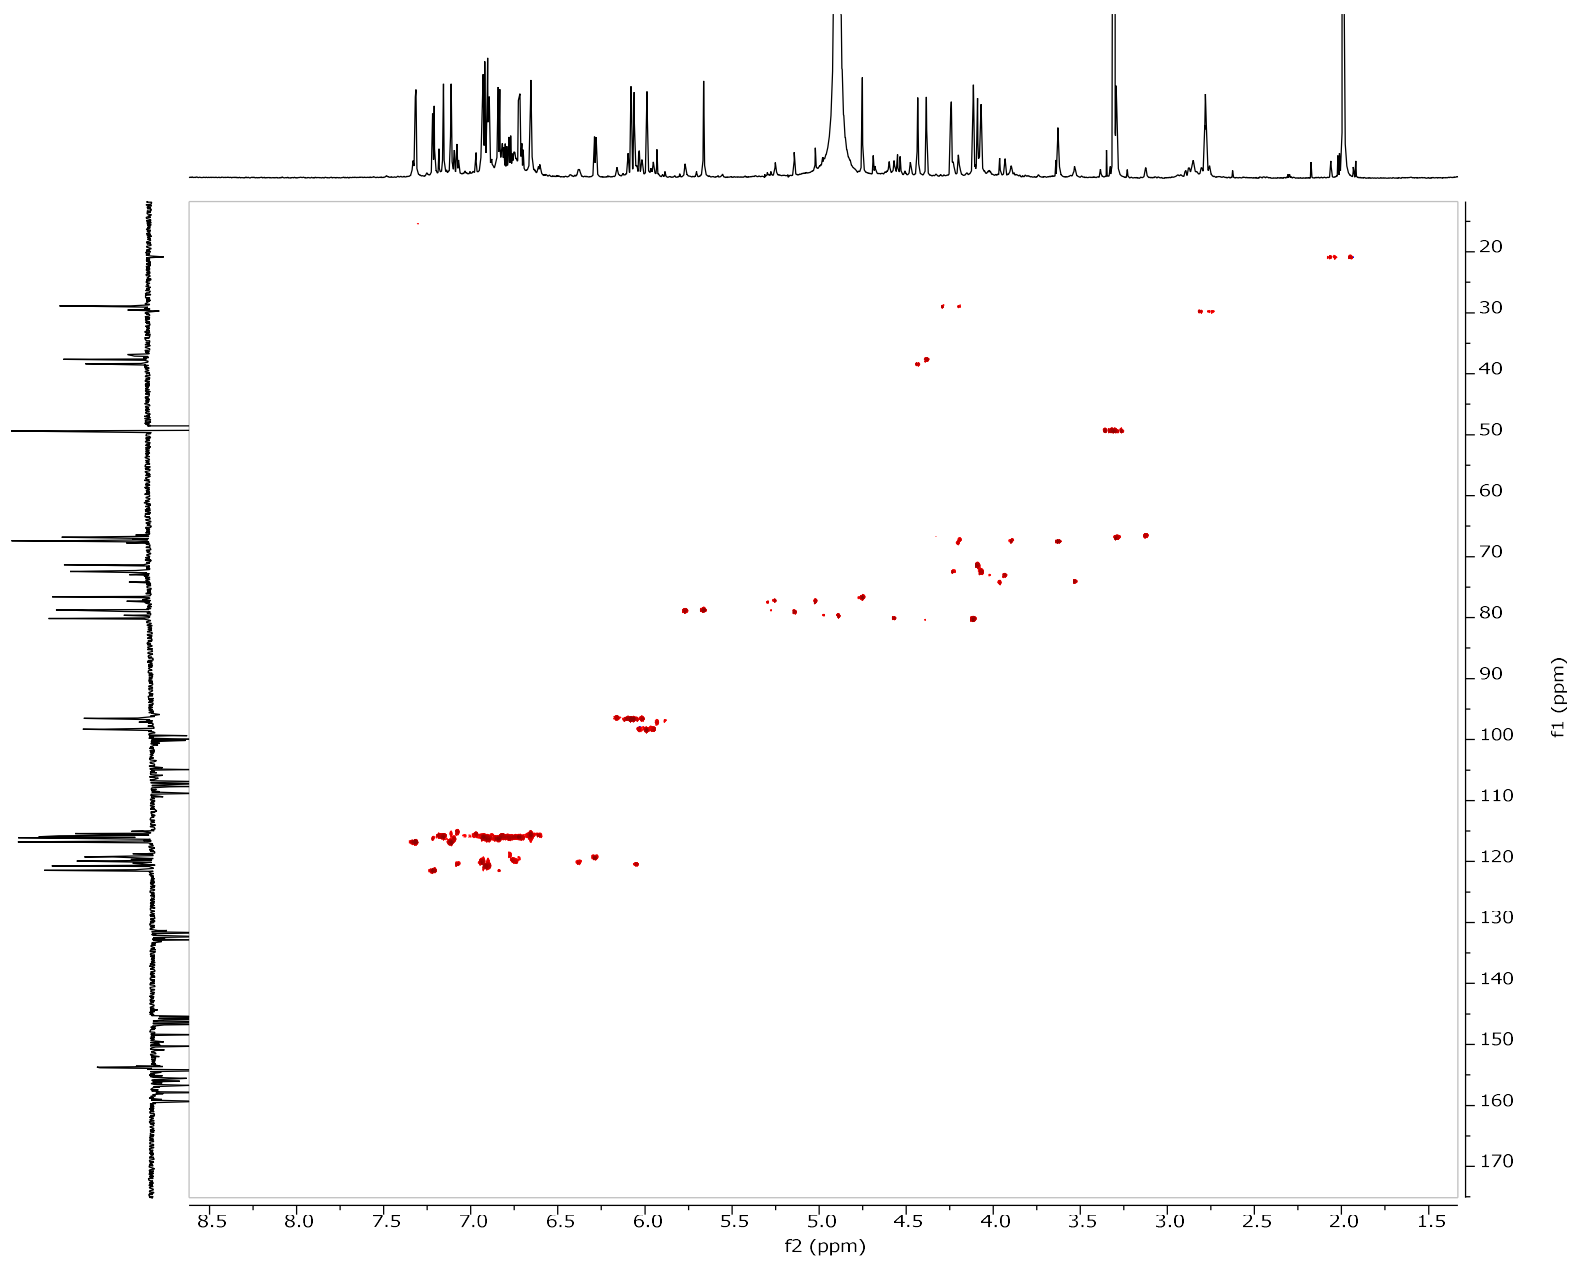

S12.  $^1\text{H}$ - $^{13}\text{C}$  HMBC NMR spectrum ( $\text{CD}_3\text{OD}$ , 298 K) of 2.

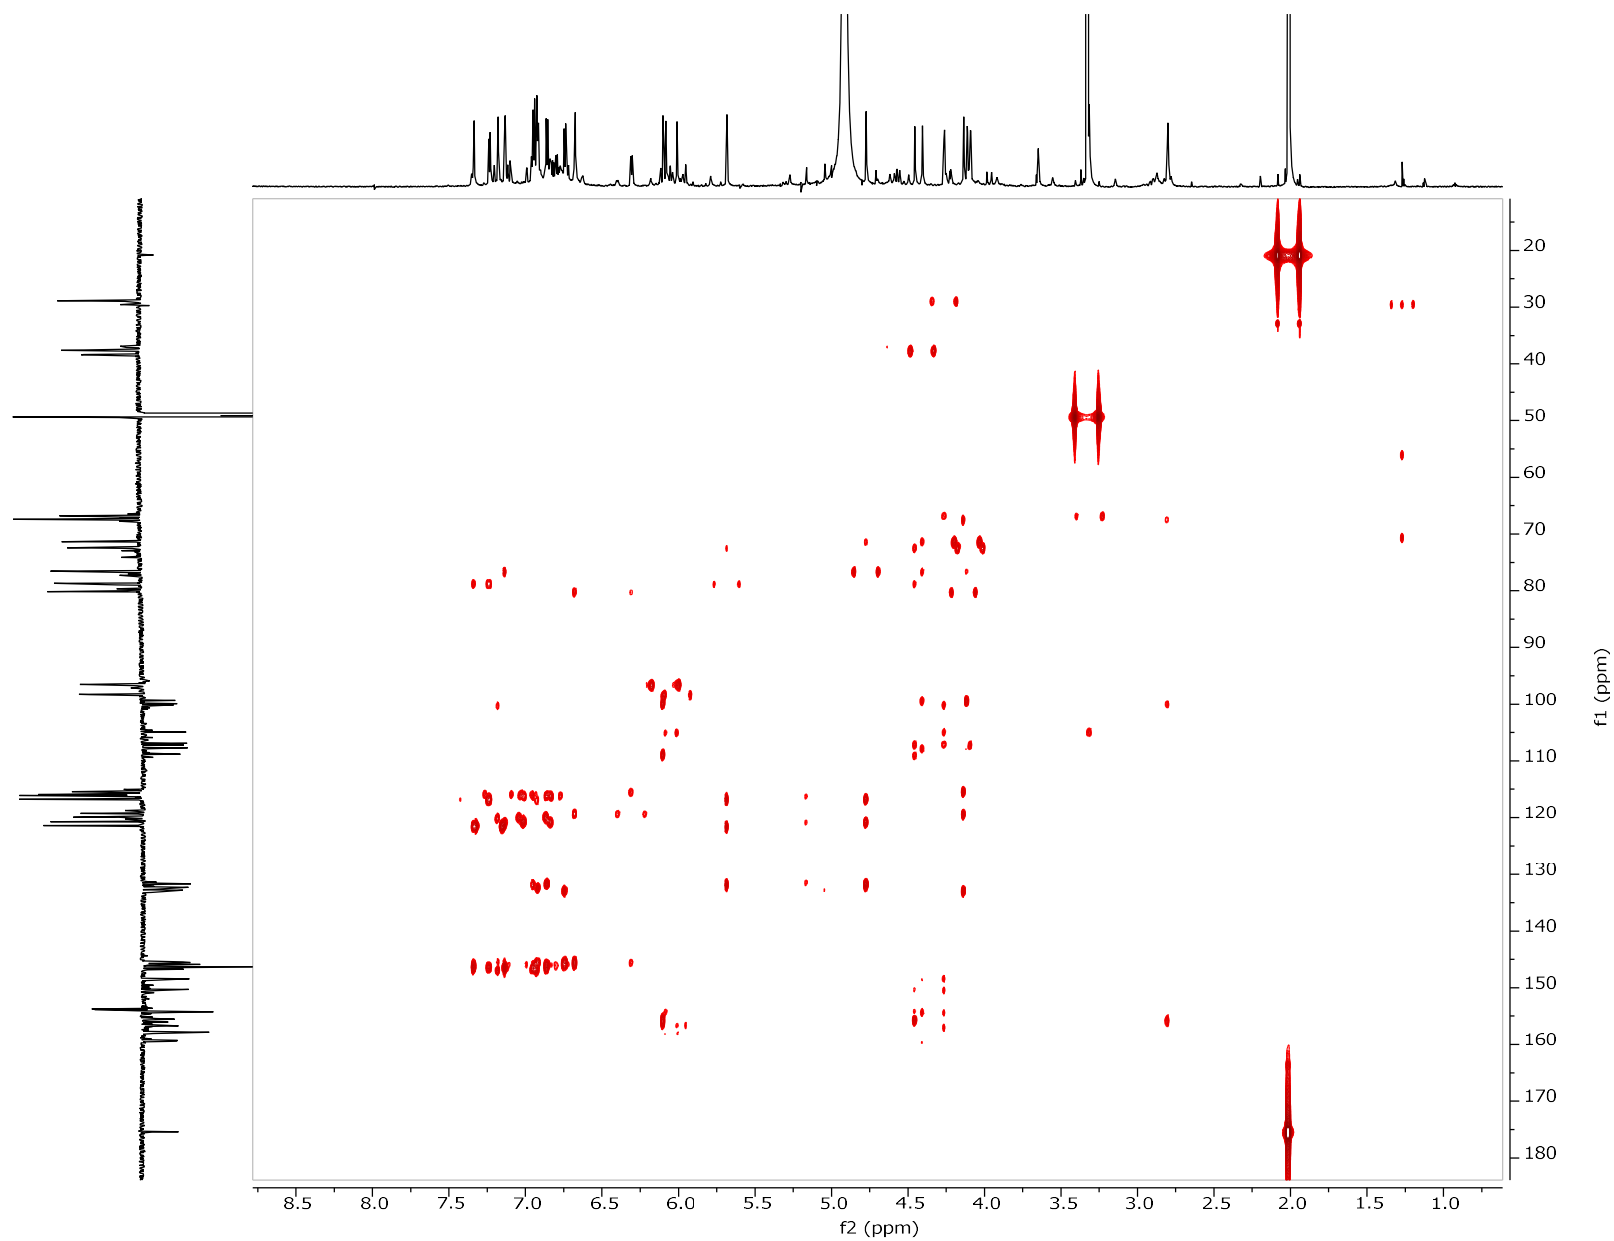

S13.  $^1\text{H}$  NMR spectrum (900 MHz,  $\text{CD}_3\text{OD}$ , 298 K) of **3**.

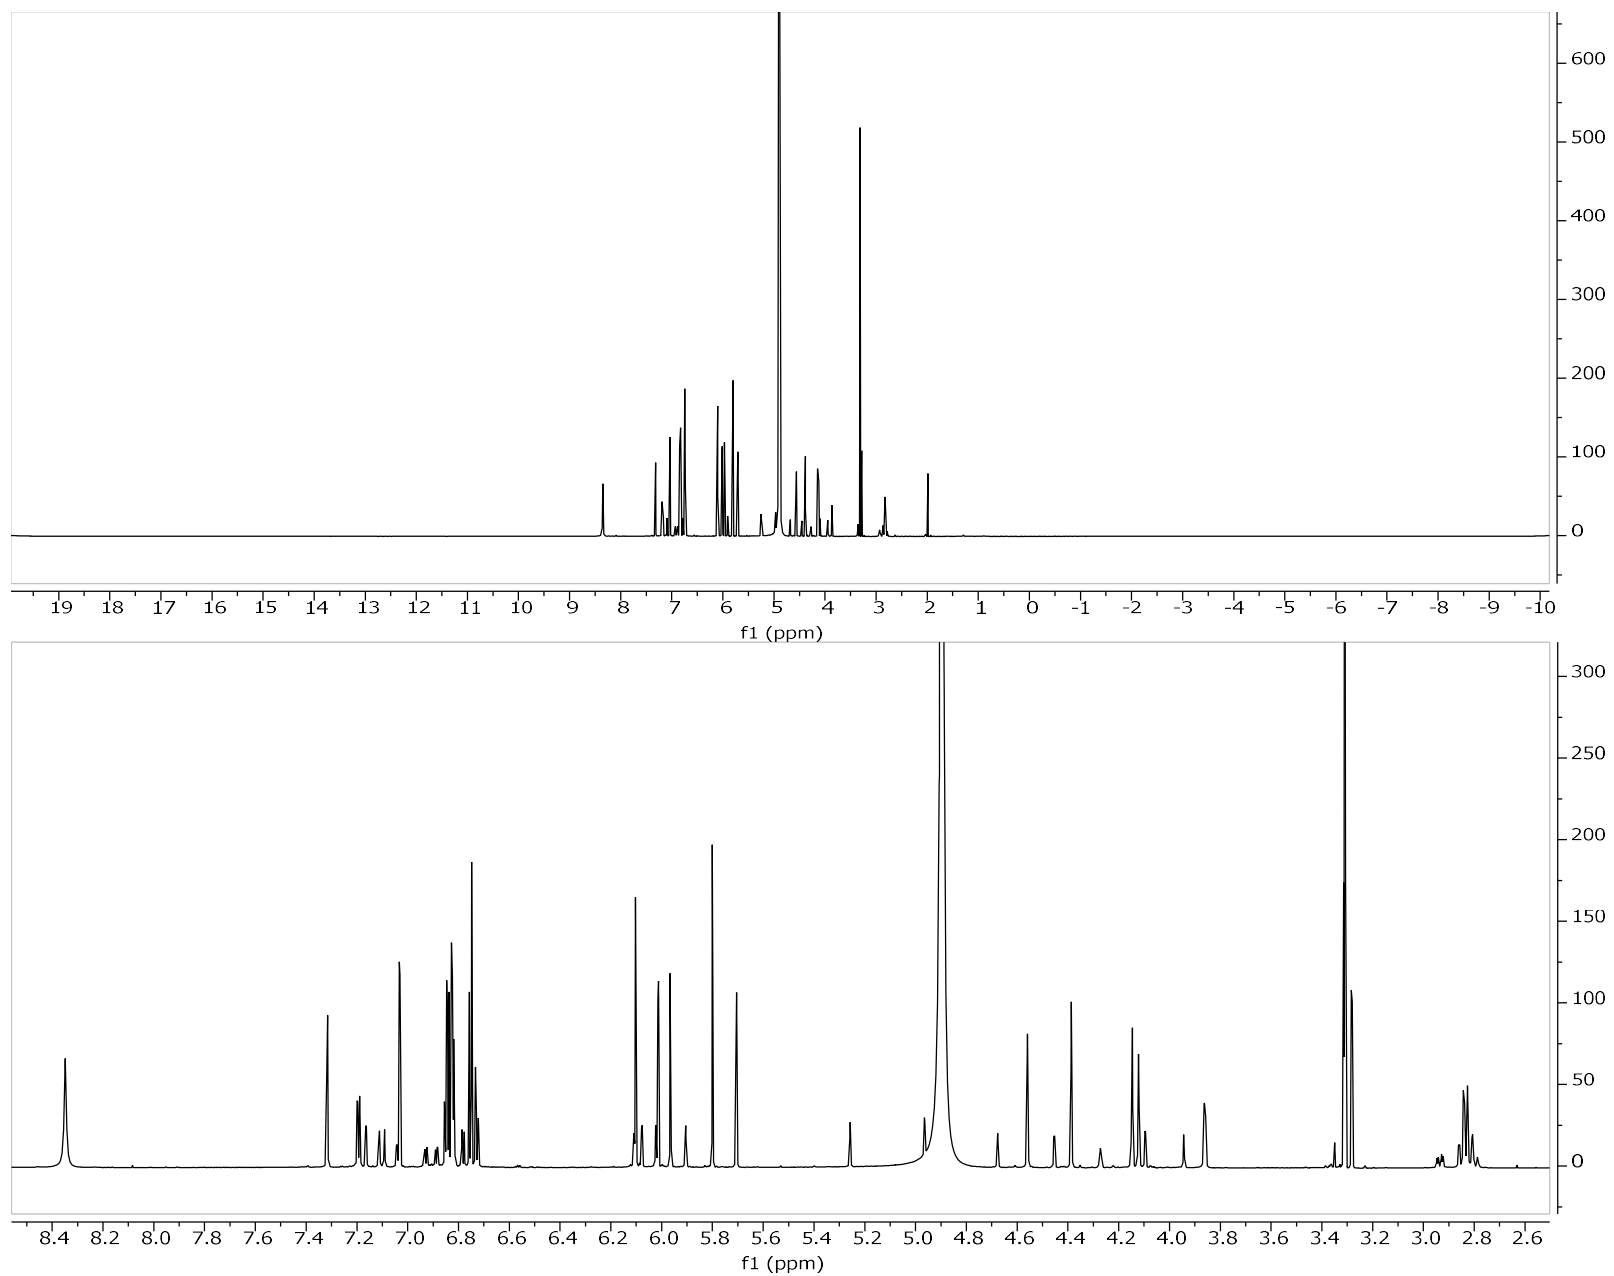



S14. DEPTQ-135 NMR spectrum (225 MHz, CD<sub>3</sub>OD, 298 K) of 3.

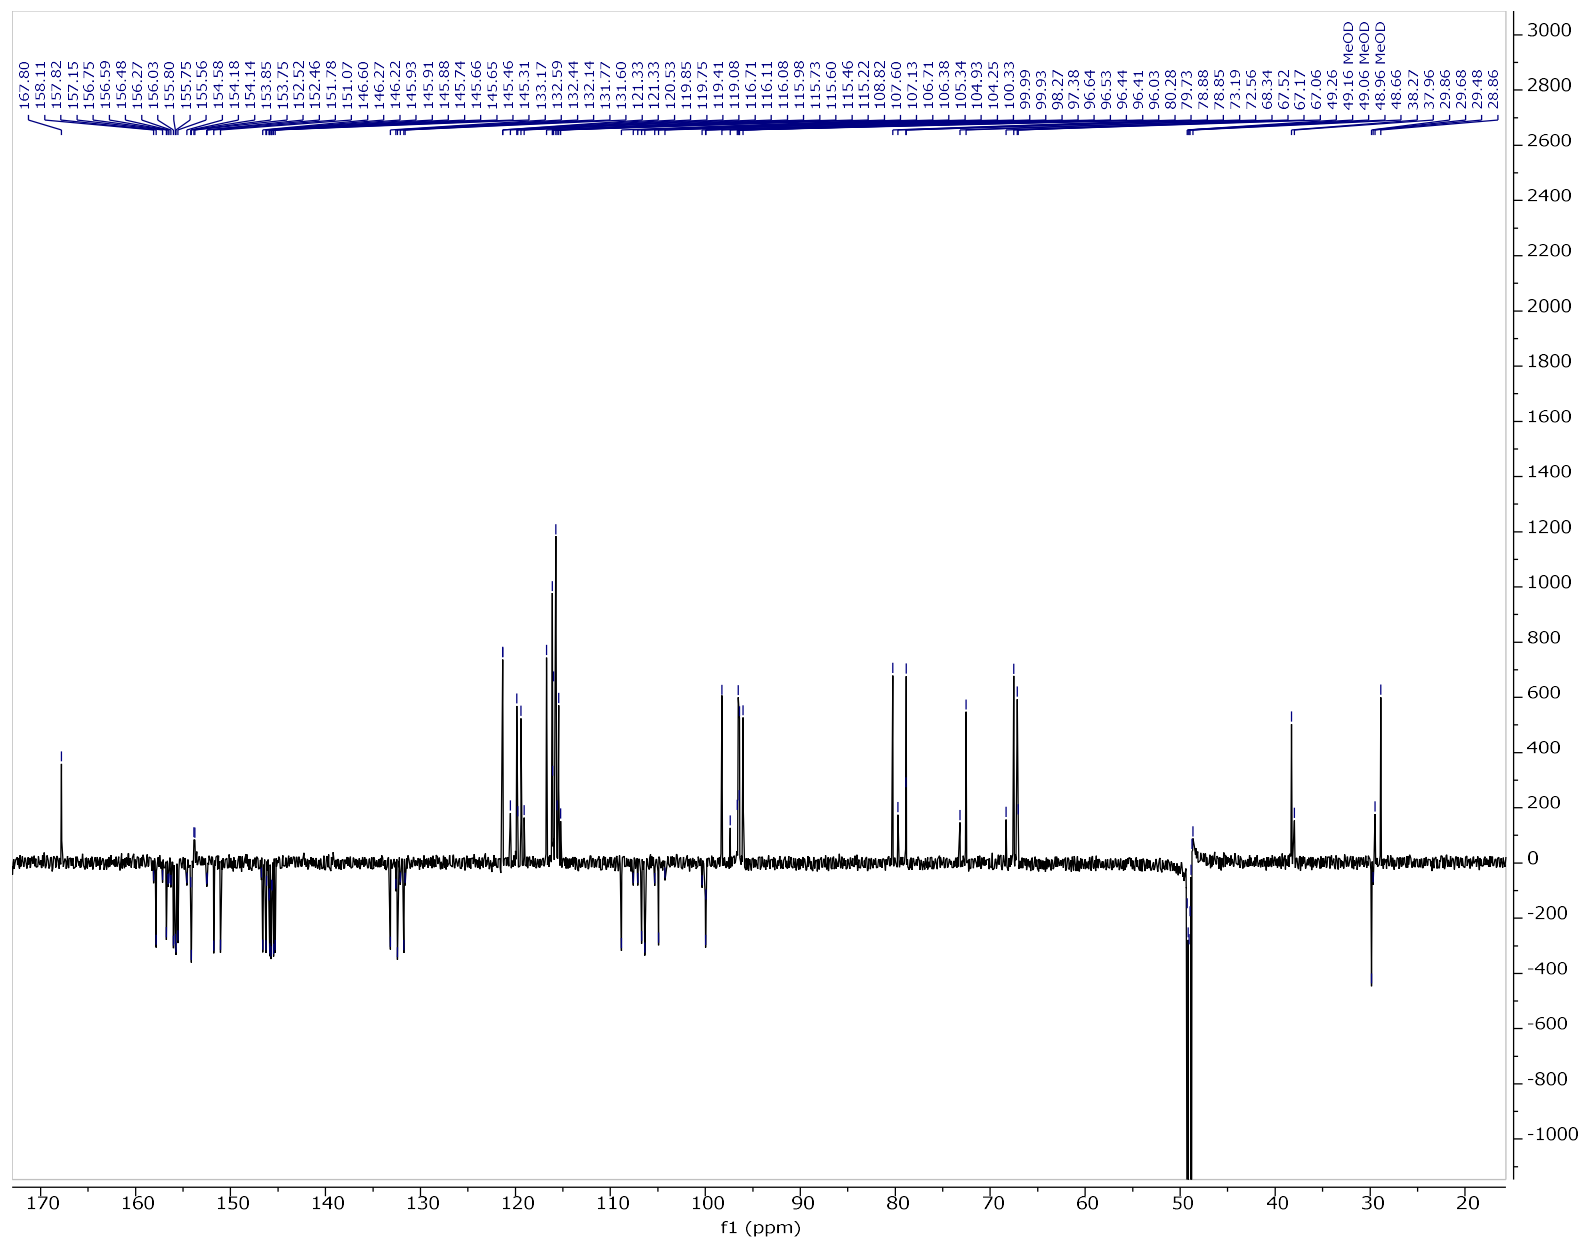

S15.  $^1\text{H}$ - $^1\text{H}$  COSY NMR spectrum ( $\text{CD}_3\text{OD}$ , 298 K) of 3.

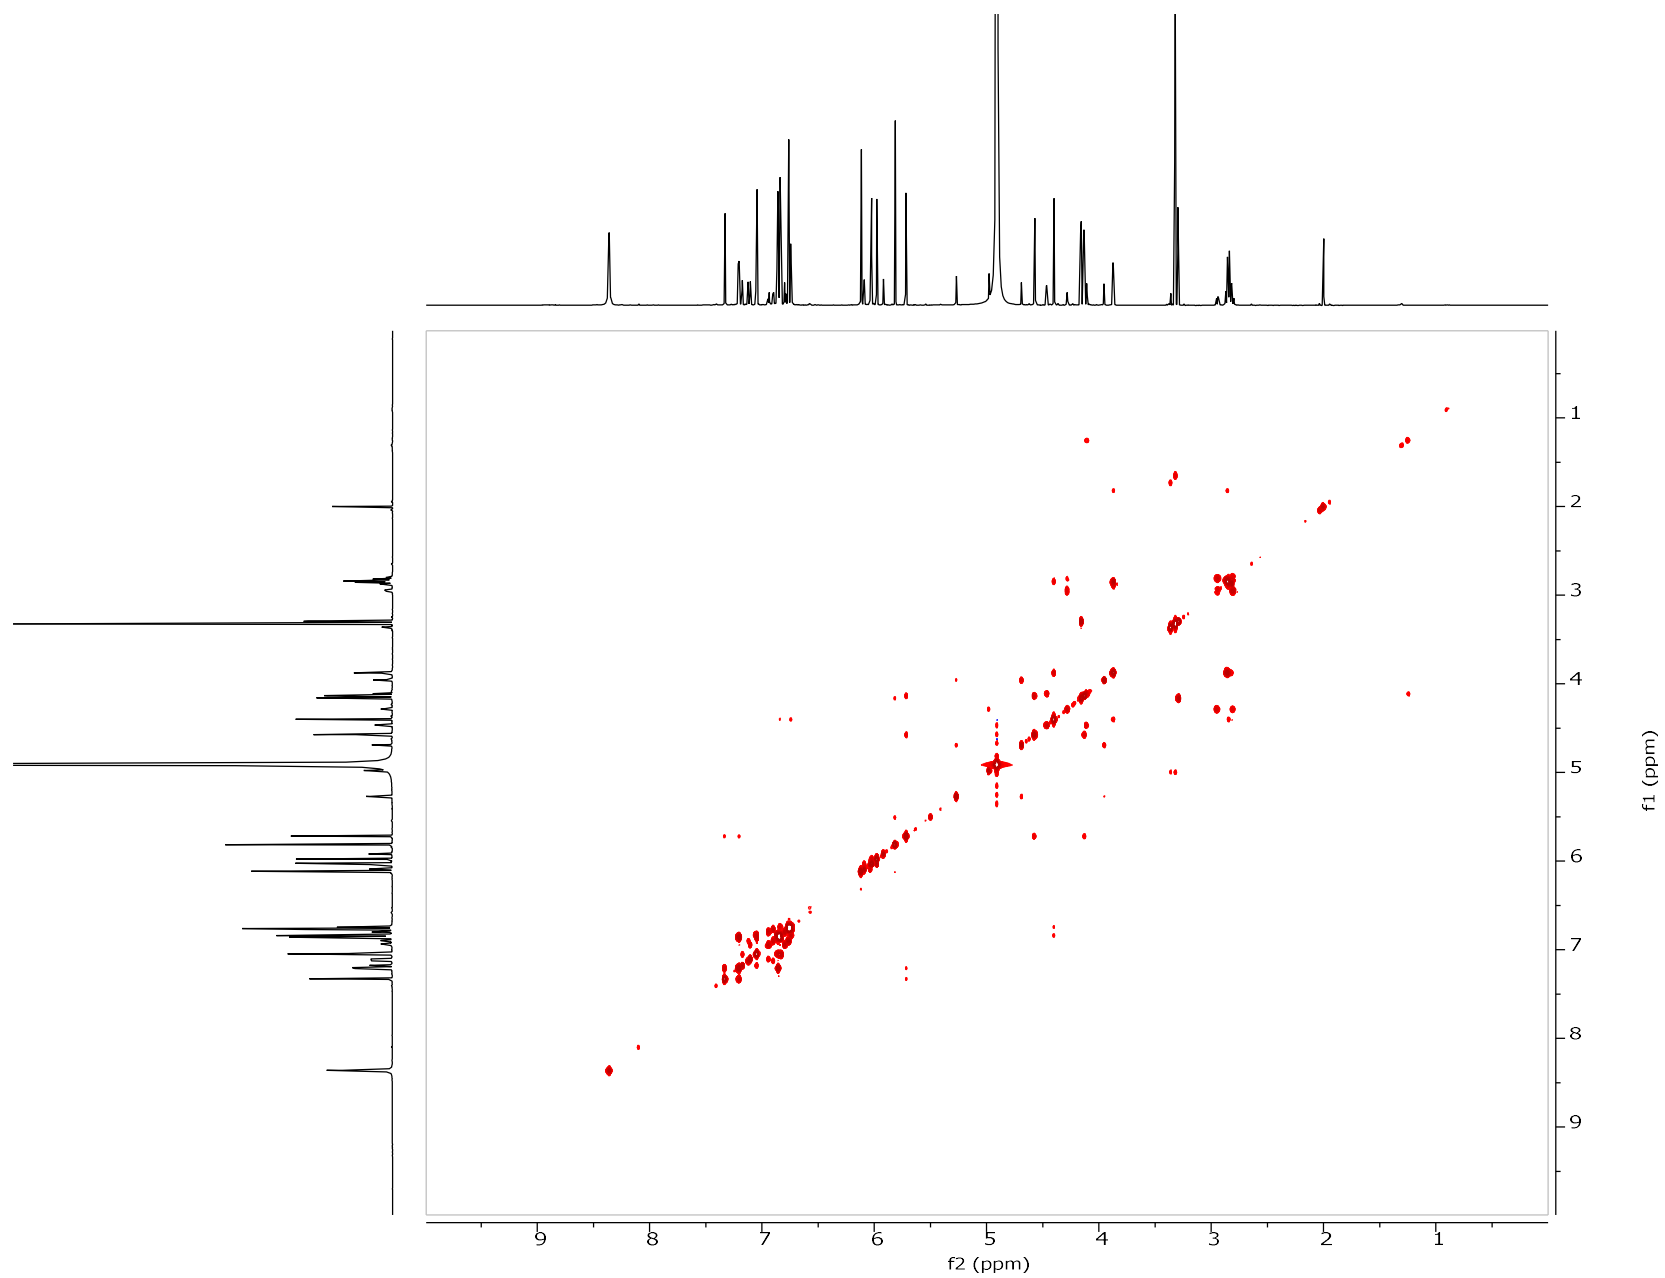

S16.  $^1\text{H}$ - $^1\text{H}$  ROESY NMR spectrum ( $\text{CD}_3\text{OD}$ , 298 K) of **3**.

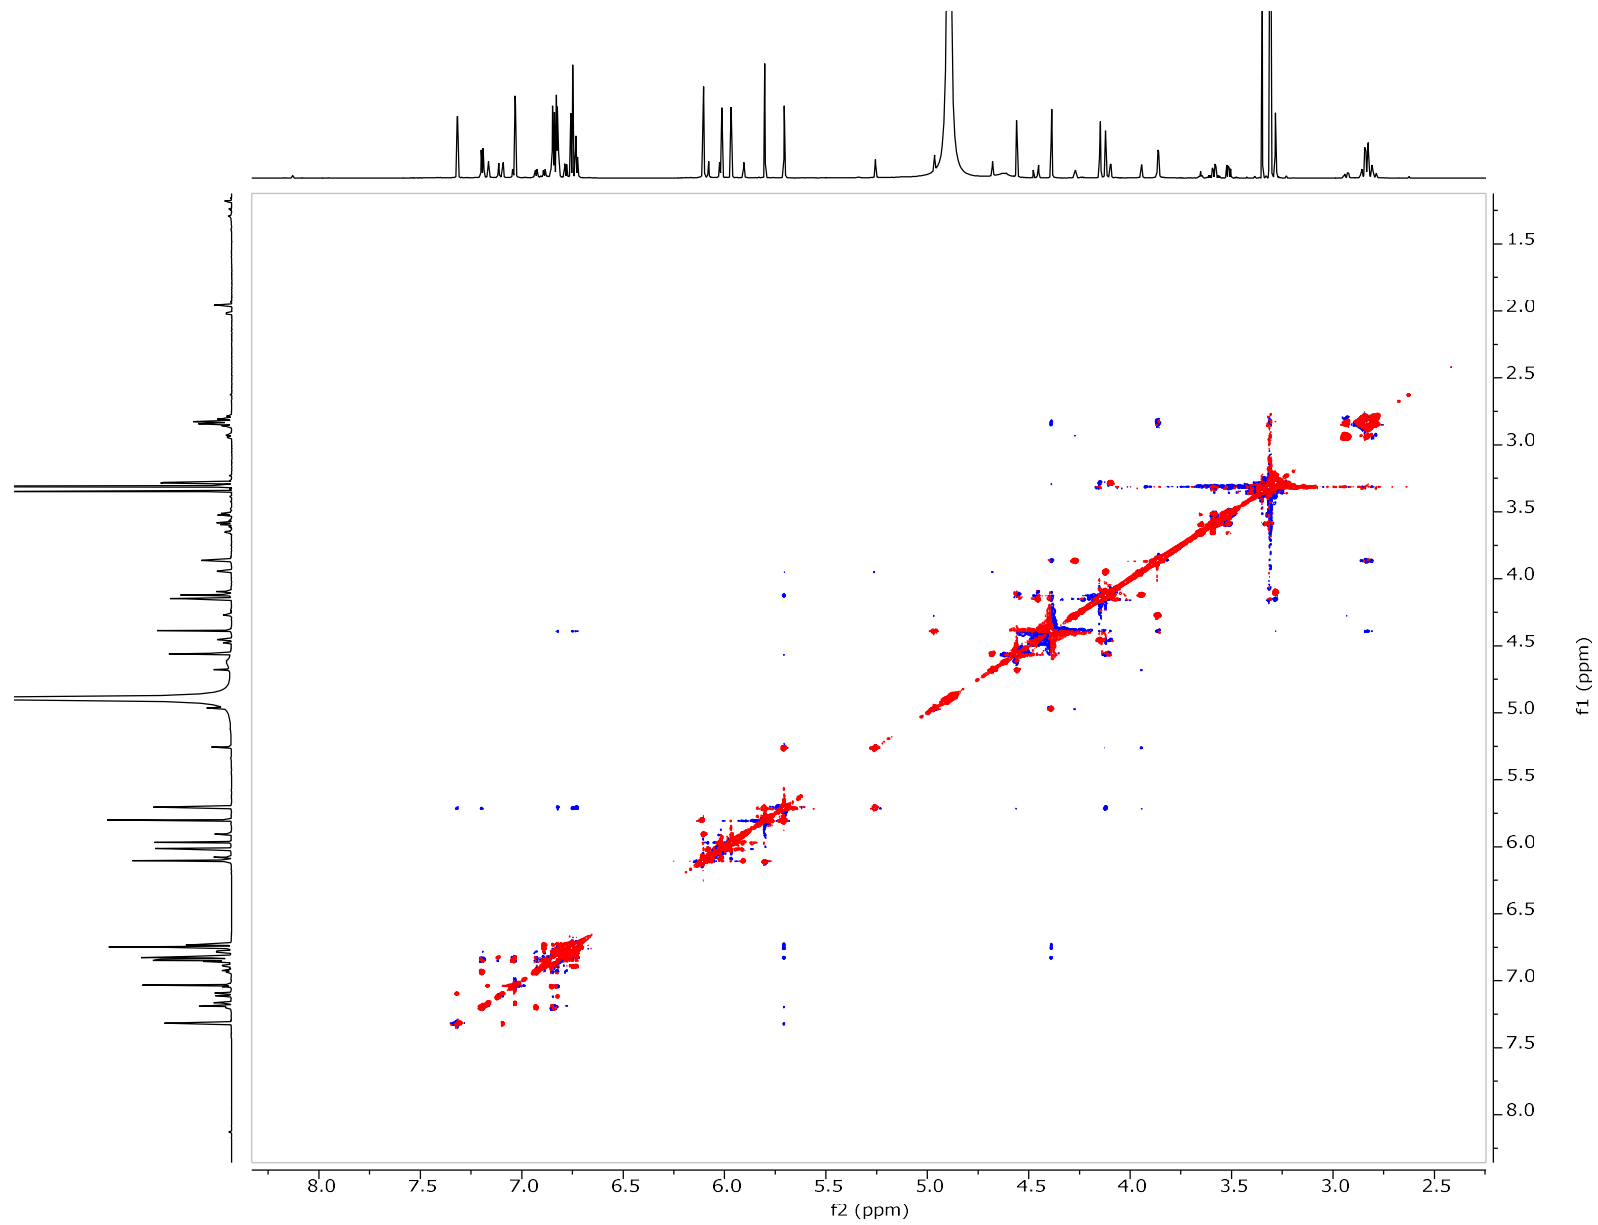

S17.  $^1\text{H}$ - $^{13}\text{C}$  HSQC NMR spectrum ( $\text{CD}_3\text{OD}$ , 298 K) of 3.

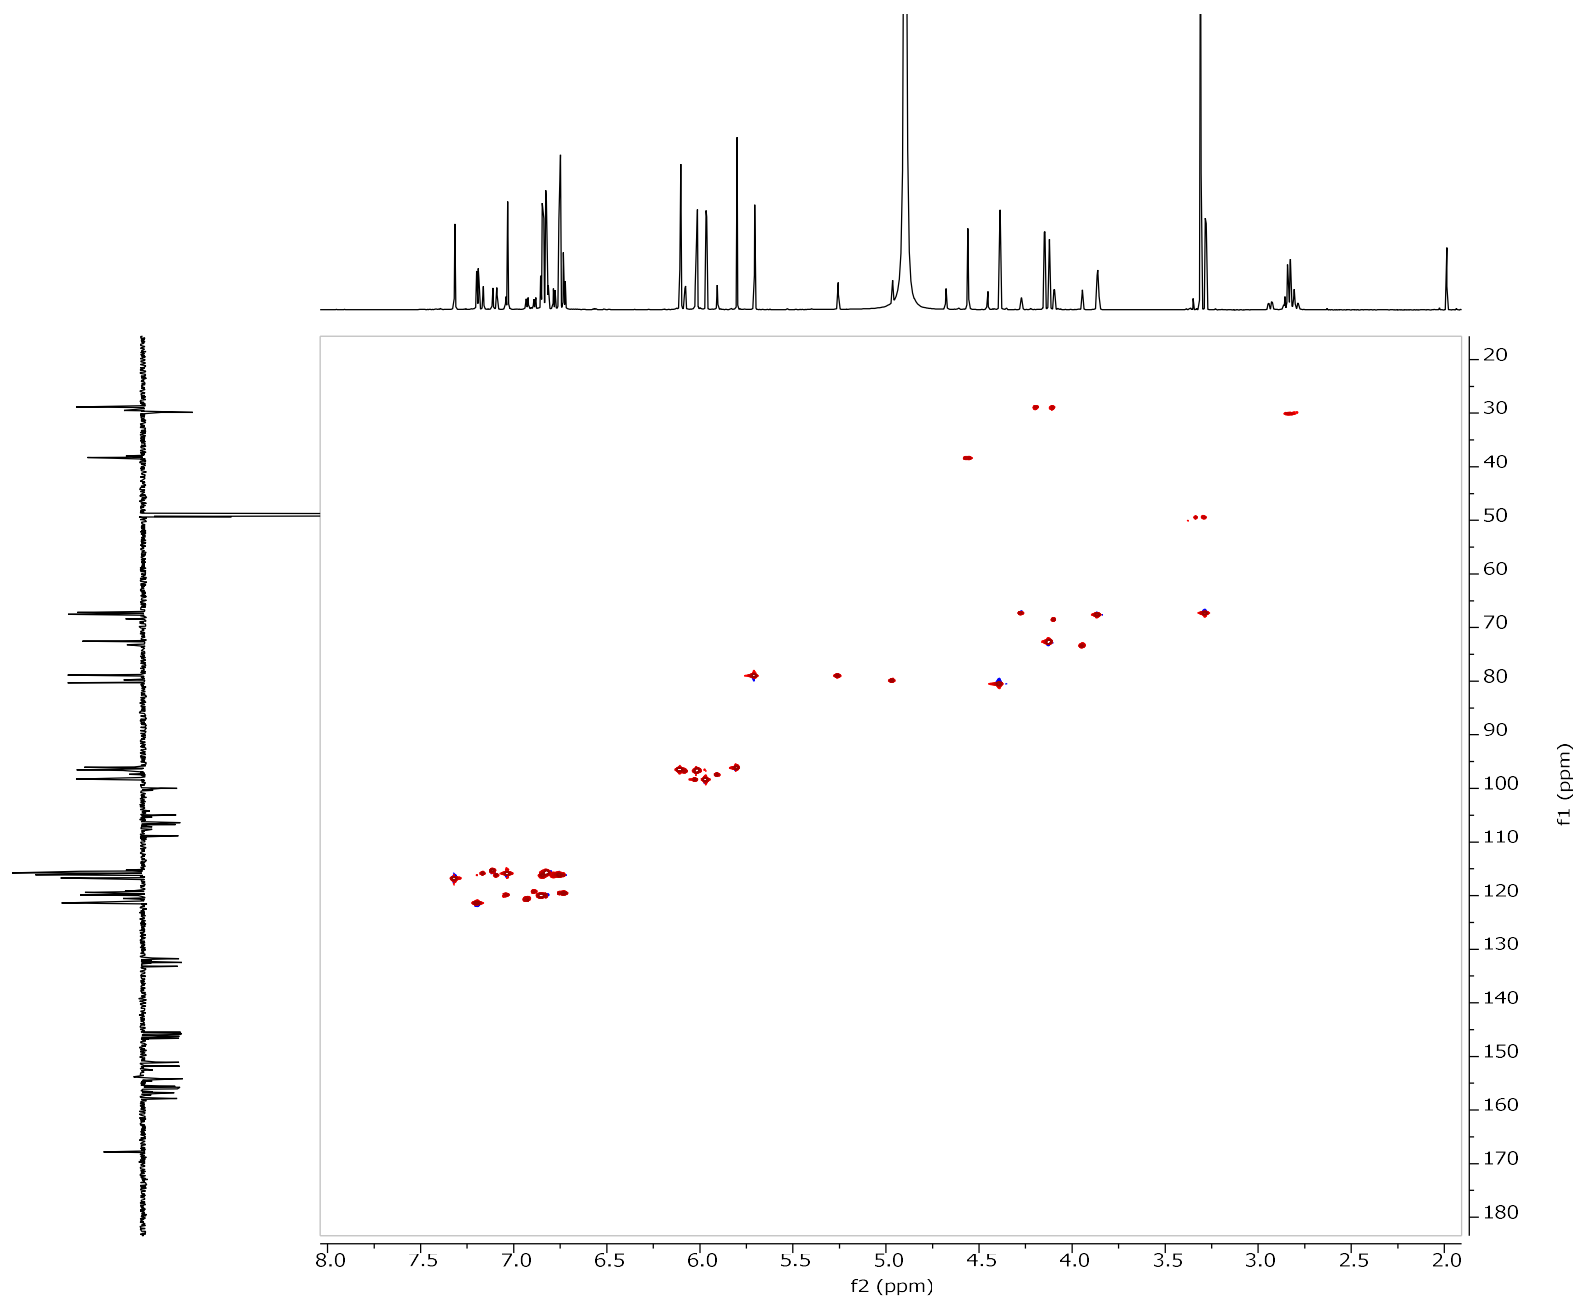

S18.  $^1\text{H}$ - $^{13}\text{C}$  HMBC NMR spectrum ( $\text{CD}_3\text{OD}$ , 298 K) of 3.

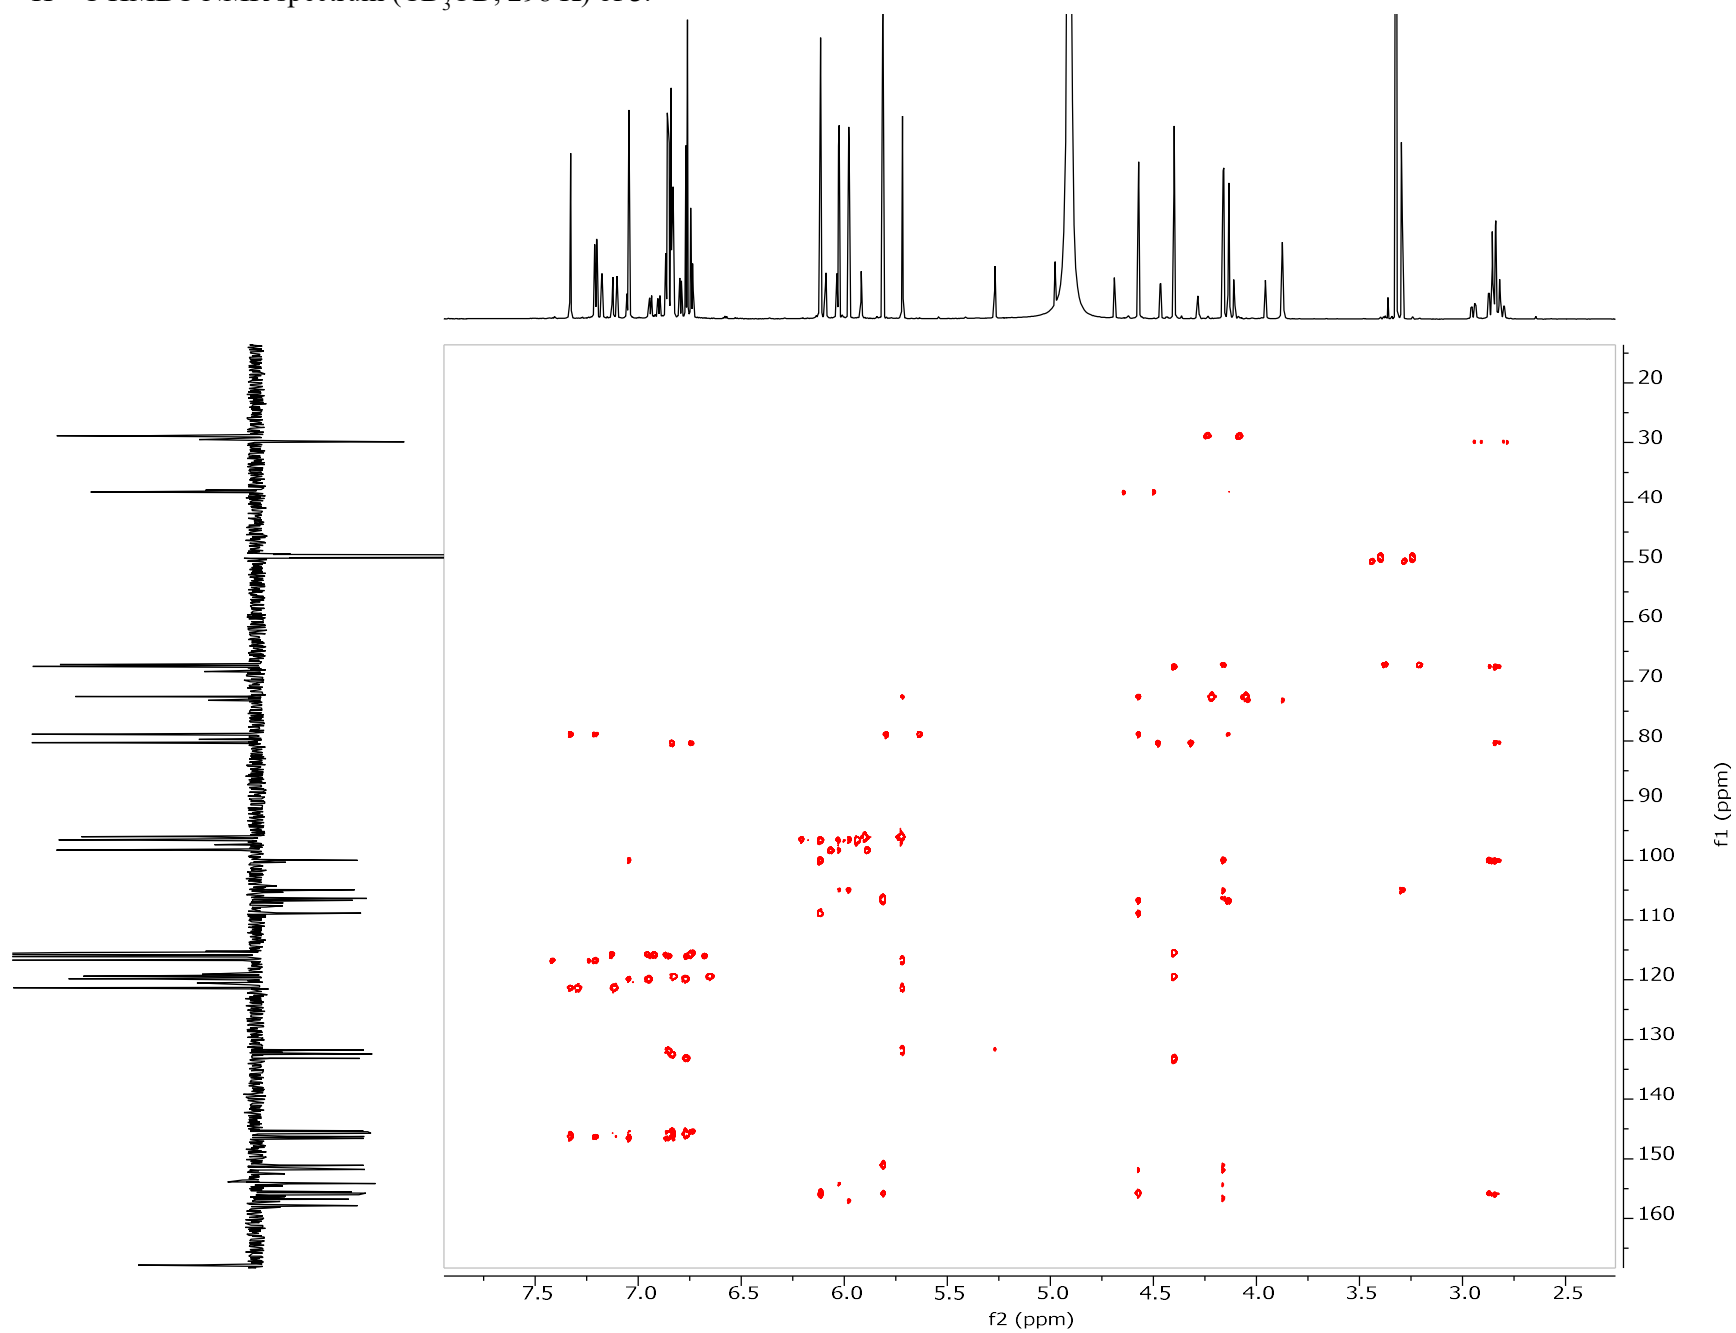

### S19. The <sup>1</sup>H NMR fingerprint of **1** (PERCH .pms file format).

#### CHEMICAL SHIFTS(PPM):

```
PROTON  2*SPIN= 1 SPECIES=1H  POPULATION(Y)= 1.00000
H2 /1    6.033766  1*1*1  STAT=Y  PRED= 2.260 RANGE= 2.258 WIDTH(Y)= 2.260 RESP(Y)= 0.5190 HSQC= C2
H6 /1    6.085811  1*1*1  STAT=Y  PRED= 3.204 RANGE= 3.204 WIDTH(Y)= 2.300 RESP(Y)= 0.6540 HSQC= C6
H7 /1    4.438954  1*1*1  STAT=Y  PRED= 2.409 RANGE= 2.408 WIDTH(Y)= 2.409 RESP(Y)= 0.5040 HSQC= C7
H8 /1    4.102838  1*1*1  STAT=Y  PRED= 2.974 RANGE= 2.974 WIDTH(Y)= 2.400 RESP(Y)= 0.5800 HSQC= C8
H12 /1   7.028229  1*1*1  STAT=Y  PRED= 1.952 RANGE= 1.948 WIDTH(Y)= 1.952 RESP(Y)= 0.4920 HSQC= C12
H13 /1   6.811617  1*1*1  STAT=Y  PRED= 3.200 RANGE= 3.197 WIDTH(Y)= 3.200 RESP(Y)= 1.0000 HSQC= C13
H16 /1   7.156230  1*1*1  STAT=Y  PRED= 2.097 RANGE= 2.097 WIDTH(Y)= 2.097 RESP(Y)= 0.6850 HSQC= C16
H26 /1   6.059022  1*1*1  STAT=Y  PRED= 2.642 RANGE= 2.638 WIDTH(Y)= 2.642 RESP(Y)= 0.7110 HSQC= C26
H29 /1   5.337107  1*1*1  STAT=Y  PRED= 2.095 RANGE= 2.095 WIDTH(Y)= 2.095 RESP(Y)= 0.4580 HSQC= C29
H30 /1   3.966907  1*1*1  STAT=Y  PRED= 2.456 RANGE= 2.456 WIDTH(Y)= 2.900 RESP(Y)= 0.4930 HSQC= C30
H31 /1   4.712497  1*1*1  STAT=Y  PRED= 3.329 RANGE= 3.327 WIDTH(Y)= 3.329 RESP(Y)= 0.6280 HSQC= C31
H33 /1   7.122883  1*1*1  STAT=Y  PRED= 2.622 RANGE= 2.618 WIDTH(Y)= 2.622 RESP(Y)= 0.5930 HSQC= C33
H36 /1   6.773527  1*1*1  STAT=Y  PRED= 2.516 RANGE= 2.516 WIDTH(Y)= 2.516 RESP(Y)= 0.5170 HSQC= C36
H37 /1   6.934001  1*1*1  STAT=Y  PRED= 1.952 RANGE= 1.948 WIDTH(Y)= 1.952 RESP(Y)= 0.7080 HSQC= C37
H42 /1   6.036050  1*1*1  STAT=Y  PRED= 2.330 RANGE= 2.328 WIDTH(Y)= 2.330 RESP(Y)= 0.5260 HSQC= C42
H50 /1   4.112117  1*1*1  STAT=Y  PRED= 6.253 RANGE= 6.253 WIDTH(Y)= 3.100 RESP(Y)= 0.8200 HSQC= C50
H51 /1   4.199945  1*1*1  STAT=Y  PRED= 2.962 RANGE= 2.958 WIDTH(Y)= 2.962 RESP(Y)= 0.5450 HSQC= C51
H53 /1   7.130297  1*1*1  STAT=Y  PRED= 1.993 RANGE= 1.988 WIDTH(Y)= 1.993 RESP(Y)= 0.7620 HSQC= C53
H56 /1   6.809154  1*1*1  STAT=Y  PRED= 2.600 RANGE= 2.598 WIDTH(Y)= 2.600 RESP(Y)= 0.9260 HSQC= C56
H57 /1   7.022053  1*1*1  STAT=Y  PRED= 1.441 RANGE= 1.439 WIDTH(Y)= 1.441 RESP(Y)= 0.7640 HSQC= C57
H68 /1   6.114142  1*1*1  STAT=Y  PRED= 2.528 RANGE= 2.528 WIDTH(Y)= 2.528 RESP(Y)= 0.5210 HSQC= C68
H71 /1   4.735766  1*1*1  STAT=Y  PRED= 3.622 RANGE= 3.617 WIDTH(Y)= 3.622 RESP(Y)= 0.6520 HSQC= C71
H72 /1   4.160493  1*1*1  STAT=Y  PRED= 7.715 RANGE= 7.715 WIDTH(Y)= 3.800 RESP(Y)= 0.7820 HSQC= C72
H73A /1  3.020091  1*1*1  STAT=Y  PRED= 3.664 RANGE= 3.664 WIDTH(Y)= 3.664 RESP(Y)= 0.5510 HSQC= C73
H73B /1  2.569685  1*1*1  STAT=Y  PRED= 3.694 RANGE= 3.694 WIDTH(Y)= 3.694 RESP(Y)= 0.7250 HSQC= C73
H75 /1   6.995720  1*1*1  STAT=Y  PRED= 3.034 RANGE= 3.034 WIDTH(Y)= 3.034 RESP(Y)= 0.5360 HSQC= C75
H78 /1   6.866427  1*1*1  STAT=Y  PRED= 2.396 RANGE= 2.396 WIDTH(Y)= 2.396 RESP(Y)= 0.4860 HSQC= C78
H79 /1   6.926717  1*1*1  STAT=Y  PRED= 2.751 RANGE= 2.748 WIDTH(Y)= 2.751 RESP(Y)= 0.5180 HSQC= C79
```

#### COUPLING CONSTANTS(HZ):

```
J85_86   2.3173  J H2  H6  STAT=Y  PRED= 2.230 RANGE= 0.890
J87_88   3.2614  J H7  H8  STAT=Y  PRED= 3.680 RANGE= 2.800
J89_90   8.3488  J H12 H13 STAT=Y  PRED= 8.260 RANGE= 0.500
J89_91   2.0679  J H12 H16 STAT=Y  PRED= 2.030 RANGE= 0.800
J90_91   0.0010  J H13 H16 STAT=Y  PRED= 0.430 RANGE= 0.320
J98_99   1.2855  J H29 H30 STAT=Y  PRED= 1.130 RANGE= 2.200
J99_100  1.9076  J H30 H31 STAT=Y  PRED= 1.540 RANGE= 2.200
J101_102 0.1020  J H33 H36 STAT=Y  PRED= 0.430 RANGE= 0.320
J101_103 2.0388  J H33 H37 STAT=Y  PRED= 2.030 RANGE= 0.800
J102_103 8.2418  J H36 H37 STAT=Y  PRED= 8.260 RANGE= 0.500
J108_109 3.4825  J H50 H51 STAT=Y  PRED= 3.990 RANGE= 2.800
J110_111 0.8372  J H53 H56 STAT=Y  PRED= 0.430 RANGE= 0.320
J110_112 2.2048  J H53 H57 STAT=Y  PRED= 2.030 RANGE= 0.800
J111_112 8.3514  J H56 H57 STAT=Y  PRED= 8.260 RANGE= 0.500
J120_121 8.3597  J H71 H72 STAT=Y  PRED= 10.380 RANGE= 2.000
J121_122 5.5399  J H72 H73A STAT=Y  PRED= 6.680 RANGE= 2.800
J121_123 9.0065  J H72 H73B STAT=Y  PRED= 9.720 RANGE= 2.800
J122_123 -16.2929 J H73A H73B STAT=Y  PRED= -14.780 RANGE= 1.280
J124_125 0.3723  J H75 H78 STAT=Y  PRED= 0.430 RANGE= 0.320
J124_126 1.9923  J H75 H79 STAT=Y  PRED= 2.030 RANGE= 0.800
J125_126 7.9968  J H78 H79 STAT=Y  PRED= 8.260 RANGE= 0.500
```

#### CONTROL PARAMETERS:

```
Solvent = none (def. 99% enriched)
1.000 = Concentration (vol%, def=1.0%)
0.00100000 = Minimum line-intensity
0.00100000 = Diagonalization criterium (not in use)
899.93600000 = FIELD(1H,MHz), used to transform shifts to ppms
19.93616218 = Left frequency (ppm)
-10.17736898 = Right frequency (ppm)
10.000 = Acquisition time (s, for QMTLS)
0.000 = Line-width (for modes D, P & T, 0=use defaults)
0.206760077 = Data-point resolution (Hz)
-8.490 = GAUSSIAN (% , 0=use default from INF)
-0.342 = Dispersion contribution (% , 0=use default from INF)
0.00000000 = Decoupling frequency (for DORES)
```

**S20.** The <sup>1</sup>H NMR fingerprint of **2** (PERCH .pms file format).

CHEMICAL SHIFTS(PPM):

```

PROTON      2*SPIN= 1 SPECIES=1H      POPULATION(Y)= 1.00000
H2 /1       5.989007 1*1*1  STAT=N  PRED= 5.965 RANGE= 0.229 WIDTH(Y)= 2.760 RESP(Y)= 0.5414 HSQC= C2
H6 /1       6.062468 1*1*1  STAT=N  PRED= 6.143 RANGE= 0.218 WIDTH(Y)= 3.163 RESP(Y)= 0.5948 HSQC= C6
H7 /1       4.241997 1*1*1  STAT=N  PRED= 5.378 RANGE= 0.516 WIDTH(Y)= 2.971 RESP(Y)= 0.5694 HSQC= C7
H8 /1       3.292883 1*1*1  STAT=N  PRED= 4.350 RANGE= 0.480 WIDTH(Y)= 2.844 RESP(Y)= 0.6169 HSQC= C8
H12 /1      6.933498 1*1*1  STAT=N  PRED= 7.378 RANGE= 0.307 WIDTH(Y)= 3.002 RESP(Y)= 0.6727 HSQC= C12
H13 /1      6.899789 1*1*1  STAT=N  PRED= 6.795 RANGE= 0.257 WIDTH(Y)= 3.941 RESP(Y)= 1.0000 HSQC= C13
H16 /1      7.157797 1*1*1  STAT=N  PRED= 6.795 RANGE= 0.618 WIDTH(Y)= 2.697 RESP(Y)= 0.5787 HSQC= C16
H29 /1      5.662849 1*1*1  STAT=N  PRED= 5.283 RANGE= 0.359 WIDTH(Y)= 3.391 RESP(Y)= 0.7341 HSQC= C29
H30 /1      4.070832 1*1*1  STAT=N  PRED= 4.529 RANGE= 0.430 WIDTH(Y)= 4.490 RESP(Y)= 0.7573 HSQC= C30
H31 /1      4.434329 1*1*1  STAT=N  PRED= 5.040 RANGE= 0.497 WIDTH(Y)= 3.509 RESP(Y)= 0.5926 HSQC= C31
H33 /1      7.316557 1*1*1  STAT=N  PRED= 6.838 RANGE= 0.510 WIDTH(Y)= 3.402 RESP(Y)= 0.7502 HSQC= C33
H36 /1      6.838739 1*1*1  STAT=N  PRED= 6.787 RANGE= 0.277 WIDTH(Y)= 3.238 RESP(Y)= 0.7527 HSQC= C36
H37 /1      7.214955 1*1*1  STAT=N  PRED= 7.261 RANGE= 0.490 WIDTH(Y)= 2.585 RESP(Y)= 0.9334 HSQC= C37
H44 /1      5.885318 1*1*1  STAT=N  PRED= 6.094 RANGE= 0.206 WIDTH(Y)= 2.829 RESP(Y)= 0.5442 HSQC= C44
H48 /1      5.933615 1*1*1  STAT=N  PRED= 6.031 RANGE= 0.556 WIDTH(Y)= 3.499 RESP(Y)= 0.6940 HSQC= C48
H49 /1      4.384765 1*1*1  STAT=N  PRED= 4.096 RANGE= 0.499 WIDTH(Y)= 3.401 RESP(Y)= 0.6104 HSQC= C49
H50 /1      4.091542 1*1*1  STAT=N  PRED= 3.963 RANGE= 0.470 WIDTH(Y)= 3.460 RESP(Y)= 0.7167 HSQC= C50
H51 /1      4.752867 1*1*1  STAT=N  PRED= 5.013 RANGE= 0.380 WIDTH(Y)= 3.686 RESP(Y)= 0.7447 HSQC= C51
H54 /1      6.903957 1*1*1  STAT=N  PRED= 6.685 RANGE= 0.880 WIDTH(Y)= 2.789 RESP(Y)= 0.5150 HSQC= C54
H55 /1      6.923423 1*1*1  STAT=N  PRED= 6.733 RANGE= 0.320 WIDTH(Y)= 3.318 RESP(Y)= 0.8306 HSQC= C55
H58 /1      7.113305 1*1*1  STAT=N  PRED= 6.907 RANGE= 0.347 WIDTH(Y)= 3.415 RESP(Y)= 0.7801 HSQC= C58
H65 /1      6.079769 1*1*1  STAT=N  PRED= 5.949 RANGE= 0.410 WIDTH(Y)= 2.914 RESP(Y)= 0.6231 HSQC= C65
H70A/1     2.774167 1*1*1  STAT=N  PRED= 2.876 RANGE= 0.230 WIDTH(Y)= 5.227 RESP(Y)= 0.9714 HSQC= C70
H70B/1     2.789470 1*1*1  STAT=N  PRED= 2.783 RANGE= 0.280 WIDTH(Y)= 4.181 RESP(Y)= 0.7555 HSQC= C70
H71 /1     3.628458 1*1*1  STAT=N  PRED= 4.193 RANGE= 0.390 WIDTH(Y)= 3.105 RESP(Y)= 0.7371 HSQC= C71
H72 /1     4.115305 1*1*1  STAT=N  PRED= 4.881 RANGE= 0.370 WIDTH(Y)= 3.139 RESP(Y)= 0.6995 HSQC= C72
H75 /1     6.286333 1*1*1  STAT=N  PRED= 7.070 RANGE= 0.496 WIDTH(Y)= 3.393 RESP(Y)= 0.6922 HSQC= C75
H76 /1     6.721855 1*1*1  STAT=N  PRED= 6.774 RANGE= 0.270 WIDTH(Y)= 3.107 RESP(Y)= 0.7159 HSQC= C76
H79 /1     6.655720 1*1*1  STAT=N  PRED= 7.031 RANGE= 0.390 WIDTH(Y)= 4.706 RESP(Y)= 0.9747 HSQC= C79
    
```

COUPLING CONSTANTS(HZ):

```

J85_86      2.3888  J H2  H6  STAT=N  PRED= 2.185 RANGE= 1.000
J87_88      3.5741  J H7  H8  STAT=N  PRED= 3.378 RANGE= 2.000
J89_90      8.1802  J H12 H13 STAT=N  PRED= 8.401 RANGE= 1.000
J89_91      2.1622  J H12 H16 STAT=N  PRED= 2.010 RANGE= 1.000
J90_91      0.0052  J H13 H16 STAT=N  PRED= 0.514 RANGE= 1.000
J97_98      1.0178  J H29 H30 STAT=N  PRED= 2.714 RANGE= 2.000
J98_99      1.8314  J H30 H31 STAT=Y  PRED= 2.813 RANGE= 2.040
J100_101    0.0254  J H33 H36 STAT=N  PRED= 0.500 RANGE= 1.000
J100_102    2.0762  J H33 H37 STAT=N  PRED= 2.083 RANGE= 1.000
J101_102    8.4254  J H36 H37 STAT=N  PRED= 8.186 RANGE= 1.000
J107_108    2.4263  J H44 H48 STAT=N  PRED= 2.184 RANGE= 1.000
J109_110    2.0601  J H49 H50 STAT=Y  PRED= 11.869 RANGE= 3.170
J110_111    0.5580  J H50 H51 STAT=N  PRED= 3.330 RANGE= 2.000
J112_113    8.1056  J H54 H55 STAT=N  PRED= 8.186 RANGE= 1.000
J112_114    1.8240  J H54 H58 STAT=N  PRED= 2.083 RANGE= 1.000
J113_114    0.0943  J H55 H58 STAT=N  PRED= 0.500 RANGE= 1.000
J121_122   -18.4766 J H70A H70B STAT=N  PRED= -15.784 RANGE= 1.340
J121_123    1.9900  J H70A H71 STAT=N  PRED= 4.514 RANGE= 2.000
J121_124    0.0009  J H70A H72 STAT=N  PRED= 2.520 RANGE= 1.000
J122_123    4.5059  J H70B H71 STAT=N  PRED= 11.737 RANGE= 2.000
J123_124    1.4084  J H71 H72 STAT=N  PRED= 1.146 RANGE= 2.000
J125_126    8.1619  J H75 H76 STAT=N  PRED= 8.185 RANGE= 1.000
J125_127    1.7731  J H75 H79 STAT=N  PRED= 2.083 RANGE= 1.000
J126_127    0.0084  J H76 H79 STAT=N  PRED= 0.500 RANGE= 1.000
    
```

CONTROL PARAMETERS:

```

Solvent = none (def. 99% enriched)
1.000 = Concentration (vol%, def=1.0%)
0.00100000 = Minimum line-intensity
0.00100000 = Diagonalization criterium (not in use)
900.07850000 = FIELD(1H,MHz), used to transform shifts to ppms
12.95939808 = Left frequency (ppm)
-3.00332745 = Right frequency (ppm)
10.000 = Acquisition time (s, for QMTLS)
0.000 = Line-width (for modes D, P & T, 0=use defaults)
0.129250004 = Data-point resolution (Hz)
-4.670 = GAUSSIAN (% , 0=use default from INF)
5.139 = Dispersion contribution (% , 0=use default from INF)
0.00000000 = Decoupling frequency (for DORES)
    
```

**S21.** The <sup>1</sup>H NMR fingerprint of major conformer of **3** (PERCH .pms file format).

CHEMICAL SHIFTS(PPM):

```
PROTON  2*SPIN= 1 SPECIES=1H  POPULATION(Y)= 1.00000
H2 /1    5.965076  1*1*1  STAT=Y  PRED= 5.979 RANGE= 0.169 WIDTH(Y)= 1.270 RESP(Y)= 1.0000 HSQC= C2
H6 /1    6.013776  1*1*1  STAT=Y  PRED= 6.073 RANGE= 0.209 WIDTH(Y)= 1.363 RESP(Y)= 1.0000 HSQC= C6
H7 /1    4.147872  1*1*1  STAT=Y  PRED= 3.489 RANGE= 0.999 WIDTH(Y)= 1.699 RESP(Y)= 1.0000 HSQC= C7
H8 /1    3.281835  1*1*1  STAT=Y  PRED= 3.267 RANGE= 0.519 WIDTH(Y)= 1.350 RESP(Y)= 1.0000 HSQC= C8
H12 /1   6.848257  1*1*1  STAT=Y  PRED= 7.238 RANGE= 0.209 WIDTH(Y)= 1.264 RESP(Y)= 1.0000 HSQC= C12
H13 /1   6.823891  1*1*1  STAT=Y  PRED= 6.798 RANGE= 0.189 WIDTH(Y)= 1.514 RESP(Y)= 1.0000 HSQC= C13
H16 /1   7.031691  1*1*1  STAT=Y  PRED= 6.872 RANGE= 0.386 WIDTH(Y)= 1.361 RESP(Y)= 1.0000 HSQC= C16
H26 /1   5.800342  1*1*1  STAT=Y  PRED= 5.851 RANGE= 0.366 WIDTH(Y)= 1.452 RESP(Y)= 1.0000 HSQC= C26
H29 /1   5.705377  1*1*1  STAT=Y  PRED= 5.846 RANGE= 0.379 WIDTH(Y)= 1.844 RESP(Y)= 1.0000 HSQC= C29
H30 /1   4.121653  1*1*1  STAT=Y  PRED= 4.173 RANGE= 0.556 WIDTH(Y)= 2.105 RESP(Y)= 1.0000 HSQC= C30
H31 /1   4.559295  1*1*1  STAT=Y  PRED= 2.842 RANGE= 1.289 WIDTH(Y)= 1.750 RESP(Y)= 1.0000 HSQC= C31
H33 /1   7.316670  1*1*1  STAT=Y  PRED= 6.776 RANGE= 0.279 WIDTH(Y)= 1.654 RESP(Y)= 1.0000 HSQC= C33
H36 /1   6.842550  1*1*1  STAT=Y  PRED= 6.726 RANGE= 0.159 WIDTH(Y)= 1.425 RESP(Y)= 1.0000 HSQC= C36
H37 /1   7.193221  1*1*1  STAT=Y  PRED= 7.242 RANGE= 0.549 WIDTH(Y)= 1.890 RESP(Y)= 1.0000 HSQC= C37
H46 /1   6.102988  1*1*1  STAT=Y  PRED= 5.966 RANGE= 0.598 WIDTH(Y)= 1.669 RESP(Y)= 1.0000 HSQC= C46
H49 /1   4.386683  1*1*1  STAT=Y  PRED= 4.657 RANGE= 0.339 WIDTH(Y)= 2.782 RESP(Y)= 1.0000 HSQC= C49
H50 /1   3.861285  1*1*1  STAT=Y  PRED= 3.972 RANGE= 0.289 WIDTH(Y)= 2.667 RESP(Y)= 1.0000 HSQC= C50
H51A/1   2.820488  1*1*1  STAT=Y  PRED= 2.696 RANGE= 0.179 WIDTH(Y)= 3.126 RESP(Y)= 1.0000 HSQC= C51
H51B/1   2.846560  1*1*1  STAT=Y  PRED= 2.768 RANGE= 0.199 WIDTH(Y)= 2.647 RESP(Y)= 1.0000 HSQC= C51
H53 /1   6.822671  1*1*1  STAT=Y  PRED= 6.635 RANGE= 0.508 WIDTH(Y)= 1.775 RESP(Y)= 1.0000 HSQC= C53
H56 /1   6.751810  1*1*1  STAT=Y  PRED= 6.666 RANGE= 0.669 WIDTH(Y)= 1.207 RESP(Y)= 1.0000 HSQC= C56
H57 /1   6.728062  1*1*1  STAT=Y  PRED= 7.072 RANGE= 0.399 WIDTH(Y)= 1.797 RESP(Y)= 1.0000 HSQC= C57
```

COUPLING CONSTANTS(HZ):

```
J64_65   2.3393  J H2  H6  STAT=Y  PRED= 2.230 RANGE= 0.890
J66_67   3.4327  J H7  H8  STAT=Y  PRED= 3.670 RANGE= 2.800
J68_69   8.2689  J H12 H13 STAT=Y  PRED= 8.260 RANGE= 0.500
J68_70   2.1735  J H12 H16 STAT=Y  PRED= 2.030 RANGE= 0.800
J69_70   0.0037  J H13 H16 STAT=Y  PRED= 0.430 RANGE= 0.320
J77_78   0.7847  J H29 H30 STAT=Y  PRED= 1.060 RANGE= 2.000
23       1.2100  J H29 H31 STAT=Y
J78_79   1.9551  J H30 H31 STAT=Y  PRED= 1.590 RANGE= 2.200
J80_81   0.0002  J H33 H36 STAT=Y  PRED= 0.430 RANGE= 0.320
J80_82   2.0838  J H33 H37 STAT=Y  PRED= 2.030 RANGE= 0.800
J81_82   8.1893  J H36 H37 STAT=Y  PRED= 8.260 RANGE= 0.500
J87_88   0.0994  J H49 H50 STAT=Y  PRED= 1.140 RANGE= 2.200
J88_89   1.9229  J H50 H51A STAT=Y  PRED= 2.010 RANGE= 2.200
J88_90   4.8605  J H50 H51B STAT=Y  PRED= 4.410 RANGE= 2.800
J89_90   -17.3564 J H51A H51B STAT=Y  PRED= -14.870 RANGE= 1.280
J91_92   0.0266  J H53 H56 STAT=Y  PRED= 0.430 RANGE= 0.320
J91_93   2.0260  J H53 H57 STAT=Y  PRED= 2.030 RANGE= 0.800
J92_93   8.1594  J H56 H57 STAT=Y  PRED= 8.260 RANGE= 0.500
```

CONTROL PARAMETERS:

```
Solvent = none (def. 99% enriched)
1.000 = Concentration (vol%, def=1.0%)
0.00100000 = Minimum line-intensity
0.00100000 = Diagonalization criterium (not in use)
899.93600000 = FIELD(1H,MHz), used to transform shifts to ppms
19.92595746 = Left frequency (ppm)
-10.18757262 = Right frequency (ppm)
10.000 = Acquisition time (s, for QMTLS)
0.000 = Line-width (for modes D, P & T, 0=use defaults)
0.206760153 = Data-point resolution (Hz)
14.222 = GAUSSIAN (%; 0=use default from INF)
-0.167 = Dispersion contribution (%; 0=use default from INF)
0.00000000 = Decoupling frequency (for DORES)
```



**S22.** The <sup>1</sup>H NMR fingerprint of minor conformer of **3** (PERCH .pms file format).

## CHEMICAL SHIFTS(PPM):

```
PROTON      2*SPIN= 1 SPECIES=1H      POPULATION(Y)= 1.00000
H2 /1       6.022830 1*1*1  STAT=Y  PRED= 5.979 RANGE= 0.169 WIDTH(Y)= 1.232 RESP(Y)= 1.0000 HSQC= C2
H6 /1       6.078180 1*1*1  STAT=Y  PRED= 6.073 RANGE= 0.209 WIDTH(Y)= 1.362 RESP(Y)= 1.0000 HSQC= C6
H7 /1       4.453725 1*1*1  STAT=Y  PRED= 3.489 RANGE= 0.999 WIDTH(Y)= 1.698 RESP(Y)= 1.0000 HSQC= C7
H8 /1       4.095342 1*1*1  STAT=Y  PRED= 3.267 RANGE= 0.519 WIDTH(Y)= 1.305 RESP(Y)= 1.0000 HSQC= C8
H12 /1      7.037961 1*1*1  STAT=Y  PRED= 7.238 RANGE= 0.209 WIDTH(Y)= 1.220 RESP(Y)= 1.0000 HSQC= C12
H13 /1      6.816180 1*1*1  STAT=Y  PRED= 6.798 RANGE= 0.189 WIDTH(Y)= 1.475 RESP(Y)= 1.0000 HSQC= C13
H16 /1      7.163998 1*1*1  STAT=Y  PRED= 6.872 RANGE= 0.386 WIDTH(Y)= 1.364 RESP(Y)= 1.0000 HSQC= C16
H26 /1      6.108187 1*1*1  STAT=Y  PRED= 5.851 RANGE= 0.366 WIDTH(Y)= 1.419 RESP(Y)= 1.0000 HSQC= C26
H29 /1      5.257076 1*1*1  STAT=Y  PRED= 5.846 RANGE= 0.379 WIDTH(Y)= 2.079 RESP(Y)= 1.0000 HSQC= C29
H30 /1      3.943035 1*1*1  STAT=Y  PRED= 4.173 RANGE= 0.556 WIDTH(Y)= 2.177 RESP(Y)= 1.0000 HSQC= C30
H31 /1      4.676624 1*1*1  STAT=Y  PRED= 2.842 RANGE= 1.289 WIDTH(Y)= 2.974 RESP(Y)= 1.0000 HSQC= C31
H33 /1      7.091502 1*1*1  STAT=Y  PRED= 6.776 RANGE= 0.279 WIDTH(Y)= 1.608 RESP(Y)= 1.0000 HSQC= C33
H36 /1      6.782111 1*1*1  STAT=Y  PRED= 6.726 RANGE= 0.159 WIDTH(Y)= 1.816 RESP(Y)= 1.0000 HSQC= C36
H37 /1      6.928093 1*1*1  STAT=Y  PRED= 7.242 RANGE= 0.549 WIDTH(Y)= 1.372 RESP(Y)= 1.0000 HSQC= C37
H46 /1      5.905540 1*1*1  STAT=Y  PRED= 5.966 RANGE= 0.598 WIDTH(Y)= 1.698 RESP(Y)= 1.0000 HSQC= C46
H49 /1      4.964500 1*1*1  STAT=Y  PRED= 4.657 RANGE= 0.339 WIDTH(Y)= 2.735 RESP(Y)= 1.0000 HSQC= C49
H50 /1      4.271870 1*1*1  STAT=Y  PRED= 3.972 RANGE= 0.289 WIDTH(Y)= 3.466 RESP(Y)= 1.0000 HSQC= C50
H51A/1     2.794844 1*1*1  STAT=Y  PRED= 2.696 RANGE= 0.179 WIDTH(Y)= 3.036 RESP(Y)= 1.0000 HSQC= C51
H51B/1     2.934562 1*1*1  STAT=Y  PRED= 2.768 RANGE= 0.199 WIDTH(Y)= 2.498 RESP(Y)= 1.0000 HSQC= C51
H53 /1      7.112060 1*1*1  STAT=Y  PRED= 6.635 RANGE= 0.508 WIDTH(Y)= 1.623 RESP(Y)= 1.0000 HSQC= C53
H56 /1      6.752744 1*1*1  STAT=Y  PRED= 6.666 RANGE= 0.669 WIDTH(Y)= 1.012 RESP(Y)= 1.0000 HSQC= C56
H57 /1      6.887306 1*1*1  STAT=Y  PRED= 7.072 RANGE= 0.399 WIDTH(Y)= 1.718 RESP(Y)= 1.0000 HSQC= C57
```

## COUPLING CONSTANTS(HZ):

```
J64_65      2.3361  JH2  H6    STAT=Y  PRED= 2.230 RANGE= 0.890
J66_67      3.4319  JH7  H8    STAT=Y  PRED= 3.670 RANGE= 2.800
J68_69      8.2611  JH12 H13   STAT=Y  PRED= 8.260 RANGE= 0.500
J68_70      2.1671  JH12 H16   STAT=Y  PRED= 2.030 RANGE= 0.800
J69_70      0.0166  JH13 H16   STAT=Y  PRED= 0.430 RANGE= 0.320
J77_78      0.5632  JH29 H30   STAT=Y  PRED= 1.060 RANGE= 2.000
J78_79      1.9340  JH30 H31   STAT=Y  PRED= 1.590 RANGE= 2.200
J80_81      0.5591  JH33 H36   STAT=Y  PRED= 0.430 RANGE= 0.320
J80_82      2.2472  JH33 H37   STAT=Y  PRED= 2.030 RANGE= 0.800
J81_82      8.2358  JH36 H37   STAT=Y  PRED= 8.260 RANGE= 0.500
J87_88      0.0022  JH49 H50   STAT=Y  PRED= 1.140 RANGE= 2.200
J88_89      3.2159  JH50 H51A  STAT=Y  PRED= 2.010 RANGE= 2.200
J88_90      4.7611  JH50 H51B  STAT=Y  PRED= 4.410 RANGE= 2.800
J89_90     -17.3652 JH51A H51B  STAT=Y  PRED= -14.870 RANGE= 1.280
J91_92      0.3464  JH53 H56   STAT=Y  PRED= 0.430 RANGE= 0.320
J91_93      2.0125  JH53 H57   STAT=Y  PRED= 2.030 RANGE= 0.800
J92_93      8.1644  JH56 H57   STAT=Y  PRED= 8.260 RANGE= 0.500
```

## CONTROL PARAMETERS:

```
Solvent = none (def. 99% enriched)
1.000 = Concentration (vol%, def=1.0%)
0.00100000 = Minimum line-intensity
0.00100000 = Diagonalization criterium (not in use)
899.93600000 = FIELD(1H,MHz), used to transform shifts to ppm
19.92595746 = Left frequency (ppm)
-10.18757262 = Right frequency (ppm)
10.000 = Acquisition time (s, for QMTLS)
0.000 = Line-width (for modes D, P & T, 0=use defaults)
0.206760153 = Data-point resolution (Hz)
60.116 = GAUSSIAN (%), 0=use default from INF)
2.109 = Dispersion contribution (%), 0=use default from INF)
0.00000000 = Decoupling frequency (for DORES)
```

**S23.** The <sup>1</sup>H NMR fingerprint of the mixture of **3** (PERCH .pms file format).

CHEMICAL SHIFTS(PPM):

| CTBImajor |          | 2*SPIN= 1 SPECIES=1H |        | POPULATION(Y)= 0.77669 |                                                        |
|-----------|----------|----------------------|--------|------------------------|--------------------------------------------------------|
| 1-H2 /1   | 5.965076 | 1*1*1                | STAT=Y | PRED= 5.979            | RANGE= 0.169 WIDTH(Y)= 1.270 RESP(Y)= 1.0000 HSQC= C2  |
| 1-H6 /1   | 6.013776 | 1*1*1                | STAT=Y | PRED= 6.073            | RANGE= 0.209 WIDTH(Y)= 1.363 RESP(Y)= 1.0000 HSQC= C6  |
| 1-H7 /1   | 4.147824 | 1*1*1                | STAT=Y | PRED= 3.489            | RANGE= 0.999 WIDTH(Y)= 1.733 RESP(Y)= 1.0000 HSQC= C7  |
| 1-H8 /1   | 3.281785 | 1*1*1                | STAT=Y | PRED= 3.267            | RANGE= 0.519 WIDTH(Y)= 1.422 RESP(Y)= 1.0000 HSQC= C8  |
| 1-H12 /1  | 6.848206 | 1*1*1                | STAT=Y | PRED= 7.238            | RANGE= 0.209 WIDTH(Y)= 1.283 RESP(Y)= 1.0000 HSQC= C12 |
| 1-H13 /1  | 6.823857 | 1*1*1                | STAT=Y | PRED= 6.798            | RANGE= 0.189 WIDTH(Y)= 1.499 RESP(Y)= 1.0000 HSQC= C13 |
| 1-H16 /1  | 7.031613 | 1*1*1                | STAT=Y | PRED= 6.872            | RANGE= 0.386 WIDTH(Y)= 1.325 RESP(Y)= 1.0000 HSQC= C16 |
| 1-H26 /1  | 5.800342 | 1*1*1                | STAT=Y | PRED= 5.851            | RANGE= 0.366 WIDTH(Y)= 1.452 RESP(Y)= 1.0000 HSQC= C26 |
| 1-H29 /1  | 5.705377 | 1*1*1                | STAT=Y | PRED= 5.846            | RANGE= 0.379 WIDTH(Y)= 1.842 RESP(Y)= 1.0000 HSQC= C29 |
| 1-H30 /1  | 4.121596 | 1*1*1                | STAT=Y | PRED= 4.173            | RANGE= 0.556 WIDTH(Y)= 2.348 RESP(Y)= 1.0000 HSQC= C30 |
| 1-H31 /1  | 4.559281 | 1*1*1                | STAT=Y | PRED= 2.842            | RANGE= 0.199 WIDTH(Y)= 2.257 RESP(Y)= 1.0000 HSQC= C31 |
| 1-H33 /1  | 7.316613 | 1*1*1                | STAT=Y | PRED= 6.776            | RANGE= 0.279 WIDTH(Y)= 1.723 RESP(Y)= 1.0000 HSQC= C33 |
| 1-H36 /1  | 6.842505 | 1*1*1                | STAT=Y | PRED= 6.726            | RANGE= 0.159 WIDTH(Y)= 1.444 RESP(Y)= 1.0000 HSQC= C36 |
| 1-H37 /1  | 7.193167 | 1*1*1                | STAT=Y | PRED= 7.242            | RANGE= 0.549 WIDTH(Y)= 1.956 RESP(Y)= 1.0000 HSQC= C37 |
| 1-H46 /1  | 6.102988 | 1*1*1                | STAT=Y | PRED= 5.966            | RANGE= 0.598 WIDTH(Y)= 1.706 RESP(Y)= 1.0000 HSQC= C46 |
| 1-H49 /1  | 4.386622 | 1*1*1                | STAT=Y | PRED= 4.657            | RANGE= 0.339 WIDTH(Y)= 2.701 RESP(Y)= 1.0000 HSQC= C49 |
| 1-H50 /1  | 3.861219 | 1*1*1                | STAT=Y | PRED= 3.972            | RANGE= 0.289 WIDTH(Y)= 2.631 RESP(Y)= 1.0000 HSQC= C50 |
| 1-H51A /1 | 2.820501 | 1*1*1                | STAT=Y | PRED= 2.696            | RANGE= 0.179 WIDTH(Y)= 3.114 RESP(Y)= 1.0000 HSQC= C51 |
| 1-H51B /1 | 2.846492 | 1*1*1                | STAT=Y | PRED= 2.768            | RANGE= 0.199 WIDTH(Y)= 2.739 RESP(Y)= 1.0000 HSQC= C51 |
| 1-H53 /1  | 6.822558 | 1*1*1                | STAT=Y | PRED= 6.635            | RANGE= 0.508 WIDTH(Y)= 1.628 RESP(Y)= 1.0000 HSQC= C53 |
| 1-H56 /1  | 6.751769 | 1*1*1                | STAT=Y | PRED= 6.666            | RANGE= 0.669 WIDTH(Y)= 1.216 RESP(Y)= 1.0000 HSQC= C56 |
| 1-H57 /1  | 6.728005 | 1*1*1                | STAT=Y | PRED= 7.072            | RANGE= 0.399 WIDTH(Y)= 1.835 RESP(Y)= 1.0000 HSQC= C57 |
| CTBIminor |          | 2*SPIN= 1 SPECIES=1H |        | POPULATION(Y)= 0.22331 |                                                        |
| 2-H2 /2   | 6.022831 | 1*1*1                | STAT=Y | PRED= 5.979            | RANGE= 0.169 WIDTH(Y)= 1.305 RESP(Y)= 1.0000 HSQC= C2  |
| 2-H6 /2   | 6.078179 | 1*1*1                | STAT=Y | PRED= 6.073            | RANGE= 0.209 WIDTH(Y)= 1.364 RESP(Y)= 1.0000 HSQC= C6  |
| 2-H7 /2   | 4.453612 | 1*1*1                | STAT=Y | PRED= 3.489            | RANGE= 0.999 WIDTH(Y)= 2.234 RESP(Y)= 1.0000 HSQC= C7  |
| 2-H8 /2   | 4.095498 | 1*1*1                | STAT=Y | PRED= 3.267            | RANGE= 0.519 WIDTH(Y)= 1.980 RESP(Y)= 1.0000 HSQC= C8  |
| 2-H12 /2  | 7.038228 | 1*1*1                | STAT=Y | PRED= 7.238            | RANGE= 0.209 WIDTH(Y)= 1.860 RESP(Y)= 1.0000 HSQC= C12 |
| 2-H13 /2  | 6.819431 | 1*1*1                | STAT=Y | PRED= 6.798            | RANGE= 0.189 WIDTH(Y)= 2.932 RESP(Y)= 1.0000 HSQC= C13 |
| 2-H16 /2  | 7.163894 | 1*1*1                | STAT=Y | PRED= 6.872            | RANGE= 0.386 WIDTH(Y)= 1.847 RESP(Y)= 1.0000 HSQC= C16 |
| 2-H26 /2  | 6.108187 | 1*1*1                | STAT=Y | PRED= 5.851            | RANGE= 0.366 WIDTH(Y)= 1.256 RESP(Y)= 1.0000 HSQC= C26 |
| 2-H29 /2  | 5.257002 | 1*1*1                | STAT=Y | PRED= 5.846            | RANGE= 0.379 WIDTH(Y)= 2.770 RESP(Y)= 1.0000 HSQC= C29 |
| 2-H30 /2  | 3.943025 | 1*1*1                | STAT=Y | PRED= 4.173            | RANGE= 0.556 WIDTH(Y)= 2.380 RESP(Y)= 1.0000 HSQC= C30 |
| 2-H31 /2  | 4.676636 | 1*1*1                | STAT=Y | PRED= 2.842            | RANGE= 1.289 WIDTH(Y)= 2.672 RESP(Y)= 1.0000 HSQC= C31 |
| 2-H33 /2  | 7.091426 | 1*1*1                | STAT=Y | PRED= 6.776            | RANGE= 0.279 WIDTH(Y)= 1.956 RESP(Y)= 1.0000 HSQC= C33 |
| 2-H36 /2  | 6.782072 | 1*1*1                | STAT=Y | PRED= 6.726            | RANGE= 0.159 WIDTH(Y)= 1.835 RESP(Y)= 1.0000 HSQC= C36 |
| 2-H37 /2  | 6.928103 | 1*1*1                | STAT=Y | PRED= 7.242            | RANGE= 0.549 WIDTH(Y)= 2.114 RESP(Y)= 1.0000 HSQC= C37 |
| 2-H46 /2  | 5.905540 | 1*1*1                | STAT=Y | PRED= 5.966            | RANGE= 0.598 WIDTH(Y)= 1.787 RESP(Y)= 1.0000 HSQC= C46 |
| 2-H49 /2  | 4.964448 | 1*1*1                | STAT=Y | PRED= 4.657            | RANGE= 0.339 WIDTH(Y)= 3.368 RESP(Y)= 1.0000 HSQC= C49 |
| 2-H50 /2  | 4.271833 | 1*1*1                | STAT=Y | PRED= 3.972            | RANGE= 0.289 WIDTH(Y)= 3.101 RESP(Y)= 1.0000 HSQC= C50 |
| 2-H51A /2 | 2.796131 | 1*1*1                | STAT=Y | PRED= 2.696            | RANGE= 0.179 WIDTH(Y)= 3.287 RESP(Y)= 1.0000 HSQC= C51 |
| 2-H51B /2 | 2.934165 | 1*1*1                | STAT=Y | PRED= 2.768            | RANGE= 0.199 WIDTH(Y)= 2.746 RESP(Y)= 1.0000 HSQC= C51 |
| 2-H53 /2  | 7.112068 | 1*1*1                | STAT=Y | PRED= 6.635            | RANGE= 0.508 WIDTH(Y)= 2.170 RESP(Y)= 1.0000 HSQC= C53 |
| 2-H56 /2  | 6.752720 | 1*1*1                | STAT=Y | PRED= 6.666            | RANGE= 0.669 WIDTH(Y)= 1.488 RESP(Y)= 1.0000 HSQC= C56 |
| 2-H57 /2  | 6.887189 | 1*1*1                | STAT=Y | PRED= 7.072            | RANGE= 0.399 WIDTH(Y)= 2.265 RESP(Y)= 1.0000 HSQC= C57 |

COUPLING CONSTANTS(HZ):

|         |          |          |        |        |                            |
|---------|----------|----------|--------|--------|----------------------------|
| J164_65 | 2.3393   | J 1-H2   | 1-H6   | STAT=N | PRED= 2.230 RANGE= 0.890   |
| J166_67 | 3.4327   | J 1-H7   | 1-H8   | STAT=N | PRED= 3.670 RANGE= 2.800   |
| J168_69 | 8.2689   | J 1-H12  | 1-H13  | STAT=N | PRED= 8.260 RANGE= 0.500   |
| J168_70 | 2.1735   | J 1-H12  | 1-H16  | STAT=N | PRED= 2.030 RANGE= 0.800   |
| J169_70 | 0.0037   | J 1-H13  | 1-H16  | STAT=N | PRED= 0.430 RANGE= 0.320   |
| J177_78 | 0.7847   | J 1-H29  | 1-H30  | STAT=N | PRED= 1.060 RANGE= 2.000   |
| J178_79 | 1.9396   | J 1-H30  | 1-H31  | STAT=N | PRED= 1.590 RANGE= 2.200   |
| J180_81 | 0.0002   | J 1-H33  | 1-H36  | STAT=N | PRED= 0.430 RANGE= 0.320   |
| J180_82 | 2.0838   | J 1-H33  | 1-H37  | STAT=N | PRED= 2.030 RANGE= 0.800   |
| J181_82 | 8.1893   | J 1-H36  | 1-H37  | STAT=N | PRED= 8.260 RANGE= 0.500   |
| J187_88 | 0.0994   | J 1-H49  | 1-H50  | STAT=N | PRED= 1.140 RANGE= 2.200   |
| J188_89 | 1.9229   | J 1-H50  | 1-H51A | STAT=N | PRED= 2.010 RANGE= 2.200   |
| J188_90 | 4.8605   | J 1-H50  | 1-H51B | STAT=N | PRED= 4.410 RANGE= 2.800   |
| J189_90 | -17.3564 | J 1-H51A | 1-H51B | STAT=N | PRED= -14.870 RANGE= 1.280 |
| J191_92 | 0.0266   | J 1-H53  | 1-H56  | STAT=N | PRED= 0.430 RANGE= 0.320   |
| J191_93 | 2.0260   | J 1-H53  | 1-H57  | STAT=N | PRED= 2.030 RANGE= 0.800   |
| J192_93 | 8.1594   | J 1-H56  | 1-H57  | STAT=N | PRED= 8.260 RANGE= 0.500   |
| J264_65 | 2.3361   | J 2-H2   | 2-H6   | STAT=N | PRED= 2.230 RANGE= 0.890   |
| J266_67 | 3.4319   | J 2-H7   | 2-H8   | STAT=N | PRED= 3.670 RANGE= 2.800   |
| J268_69 | 8.2611   | J 2-H12  | 2-H13  | STAT=N | PRED= 8.260 RANGE= 0.500   |
| J268_70 | 2.1671   | J 2-H12  | 2-H16  | STAT=N | PRED= 2.030 RANGE= 0.800   |
| J269_70 | 0.0166   | J 2-H13  | 2-H16  | STAT=N | PRED= 0.430 RANGE= 0.320   |
| J277_78 | 0.5632   | J 2-H29  | 2-H30  | STAT=N | PRED= 1.060 RANGE= 2.000   |
| J278_79 | 1.9340   | J 2-H30  | 2-H31  | STAT=N | PRED= 1.590 RANGE= 2.200   |
| J280_81 | 0.5591   | J 2-H33  | 2-H36  | STAT=N | PRED= 0.430 RANGE= 0.320   |

|         |          |          |        |        |               |              |
|---------|----------|----------|--------|--------|---------------|--------------|
| J280_82 | 2.2472   | J 2-H33  | 2-H37  | STAT=N | PRED= 2.030   | RANGE= 0.800 |
| J281_82 | 8.2358   | J 2-H36  | 2-H37  | STAT=N | PRED= 8.260   | RANGE= 0.500 |
| J287_88 | 0.0022   | J 2-H49  | 2-H50  | STAT=N | PRED= 1.140   | RANGE= 2.200 |
| J288_89 | 3.2159   | J 2-H50  | 2-H51A | STAT=N | PRED= 2.010   | RANGE= 2.200 |
| J288_90 | 4.7611   | J 2-H50  | 2-H51B | STAT=N | PRED= 4.410   | RANGE= 2.800 |
| J289_90 | -17.3652 | J 2-H51A | 2-H51B | STAT=N | PRED= -14.870 | RANGE= 1.280 |
| J291_92 | 0.3464   | J 2-H53  | 2-H56  | STAT=N | PRED= 0.430   | RANGE= 0.320 |
| J291_93 | 2.0125   | J 2-H53  | 2-H57  | STAT=N | PRED= 2.030   | RANGE= 0.800 |
| J292_93 | 8.1644   | J 2-H56  | 2-H57  | STAT=N | PRED= 8.260   | RANGE= 0.500 |

CONTROL PARAMETERS:

Solvent = none (def. 99% enriched)  
 1.000 = Concentration (vol%, def=1.0%)  
 0.00100000 = Minimum line-intensity  
 0.00100000 = Diagonalization criterium (not in use)  
 899.93600000 = FIELD(1H,MHz), used to transform shifts to ppms  
 19.92595689 = Left frequency (ppm)  
 -10.18757232 = Right frequency (ppm)  
 10.000 = Acquisition time (s, for QMTLS)  
 0.000 = Line-width (for modes D, P & T, 0=use defaults)  
 0.206760153 = Data-point resolution (Hz)  
 31.203 = GAUSSIAN (% , 0=use default from INF)  
 -0.921 = Dispersion contribution (% , 0=use default from INF)  
 0.00000000 = Decoupling frequency (for DORES)

S24. The CD spectra of compounds 1-3.

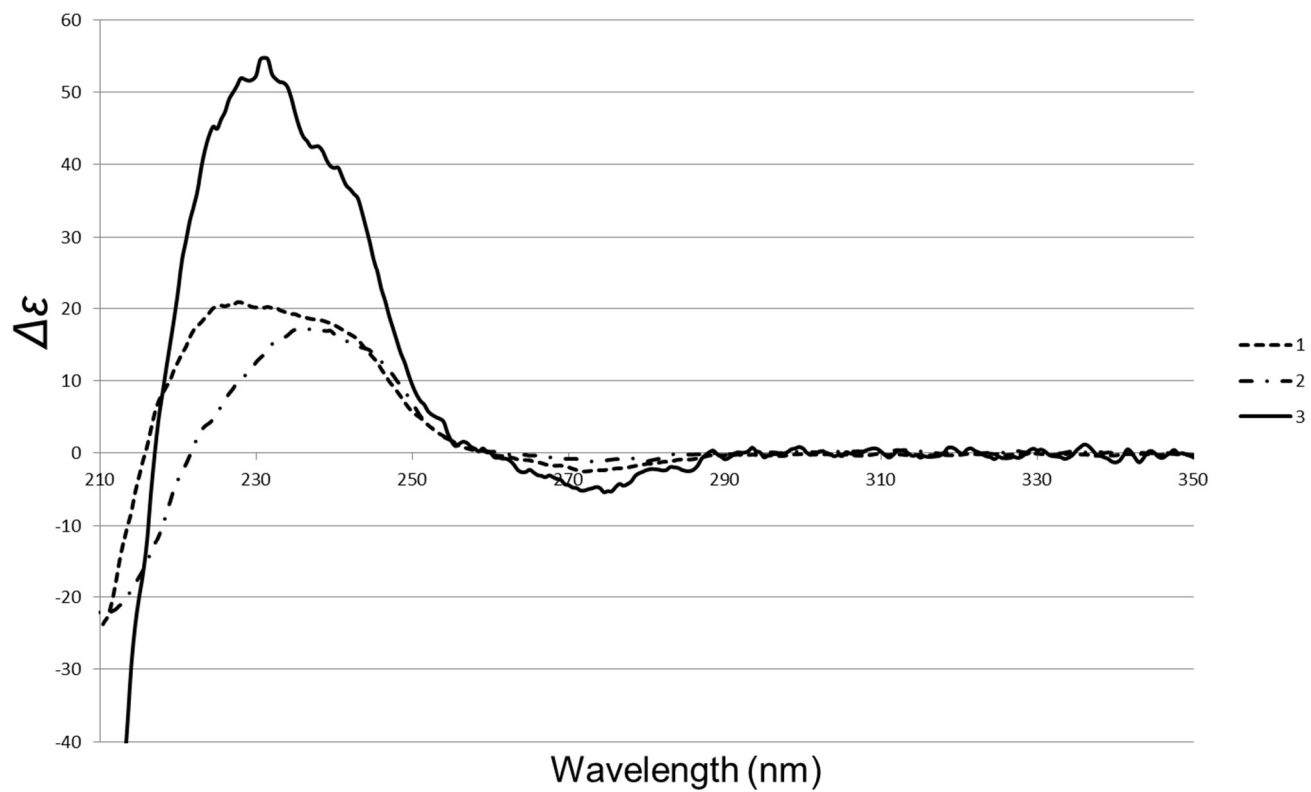

S25.  $^1\text{H}$  Comparison of NMR spectra showing that deuterium exchange reaction occurred in **2**.

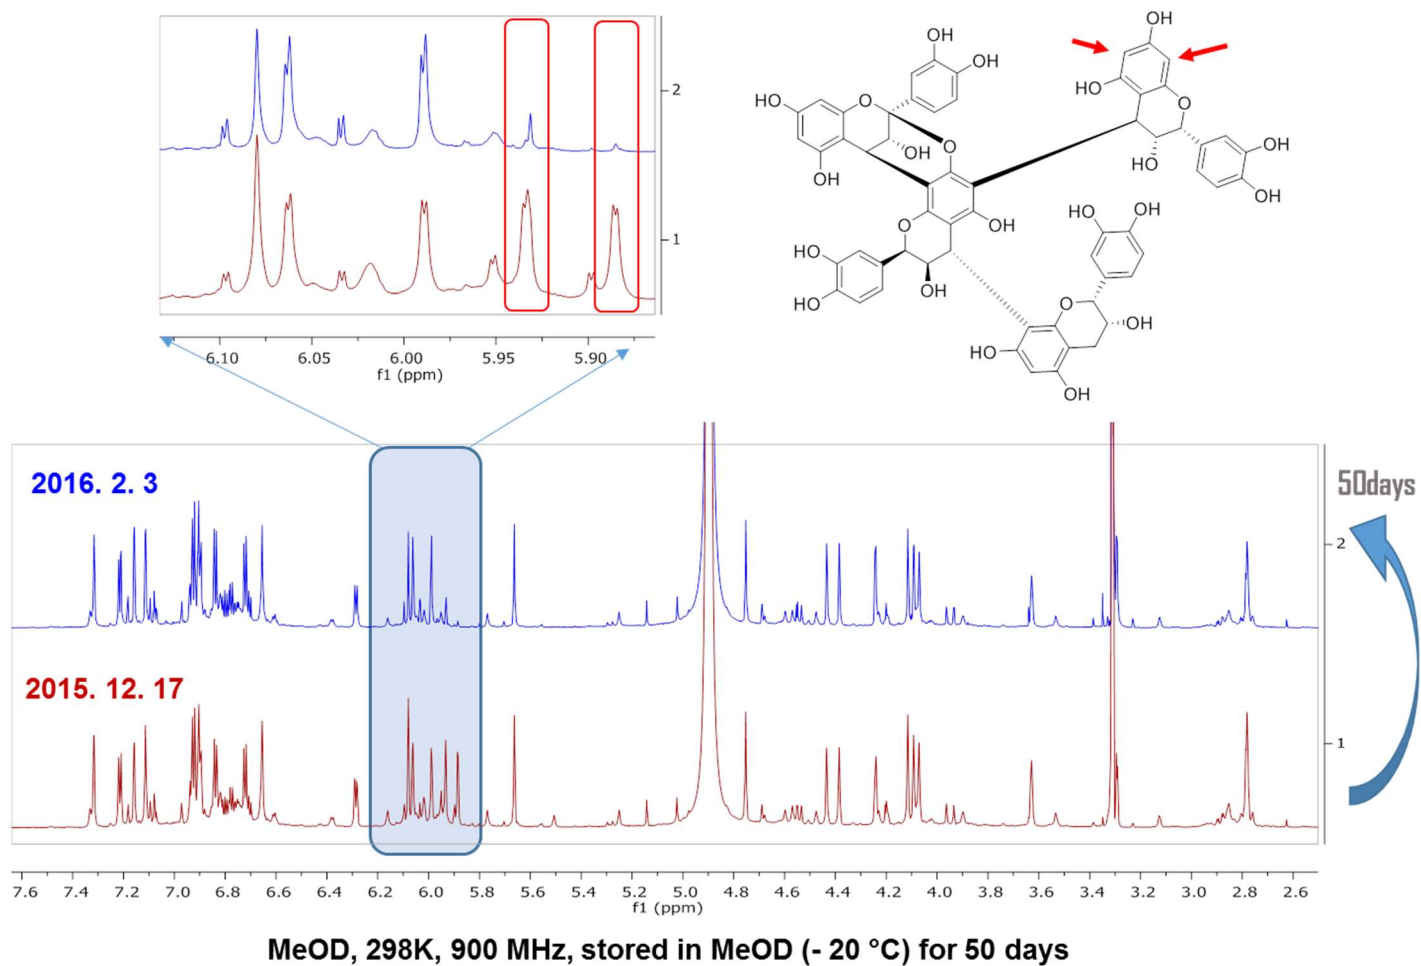

S26. Calibration of the NMR acquisition temperature.

□ VT-Calibration\_800 MHz

170 µl, 3 mm tube  
(with non-deuterated solvents)

| exp. No. | Solvent         | Set Temp (K) | peak 1 (ppm) | peak 2 (ppm) | Distance (ppm) | Actual Temp (K) |
|----------|-----------------|--------------|--------------|--------------|----------------|-----------------|
| 1        | ethylene glycol | 330          | 4.022        | 2.799        | 1.223          | 342.53          |
| 2        | ethylene glycol | 320          | 4.521        | 3.172        | 1.349          | 329.89          |
| 3        | ethylene glycol | 310          | 4.640        | 3.160        | 1.480          | 316.75          |
| 4        | methanol        | 298          | 5.051        | 3.505        | 1.546          | 300.49          |
| 5        | methanol        | 288          | 5.173        | 3.498        | 1.675          | 286.79          |
| 6        | methanol        | 278          | 4.875        | 3.073        | 1.802          | 272.53          |
| 7        | methanol        | 268          | 5.312        | 3.407        | 1.905          | 260.39          |
| 8        | methanol        | 255          | 5.436        | 3.410        | 2.026          | 245.49          |

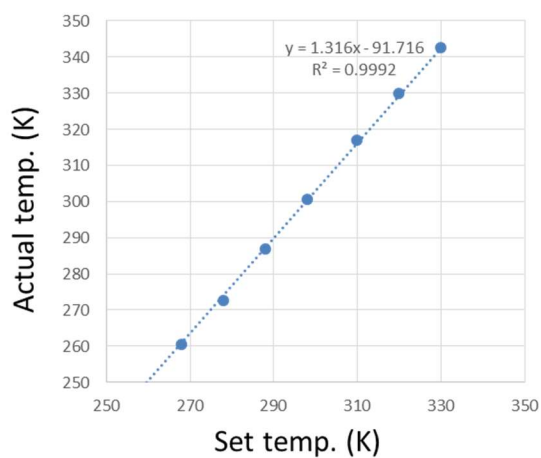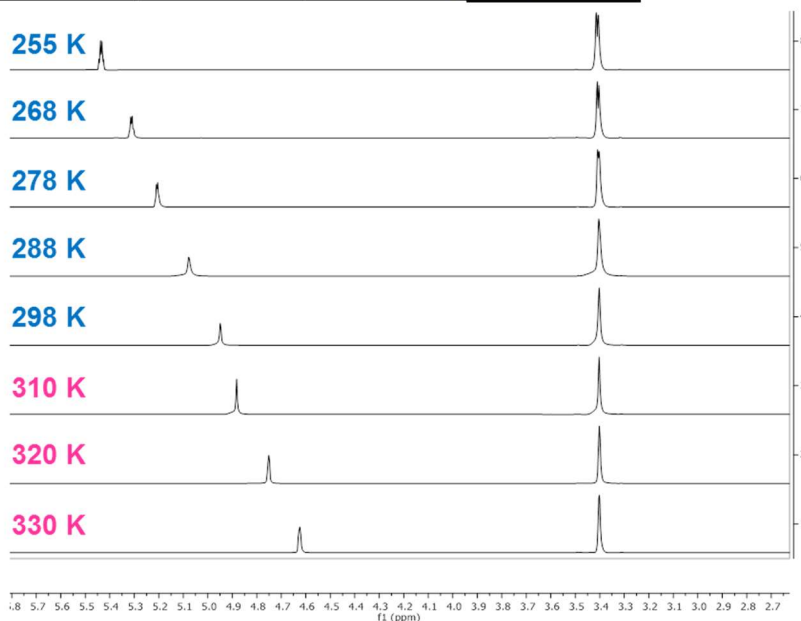

S27. Calculation of the purity of **1** by qHNMR using the 100% method.

| Composition  | Weight% |
|--------------|---------|
| Major        | 71.80   |
| Minor 1      | 21.67   |
| Minor 2      | 0.92    |
| Acetic acid  | 0.02    |
| Acetonitrile | 0.24    |
| Formic acid  | 5.35    |

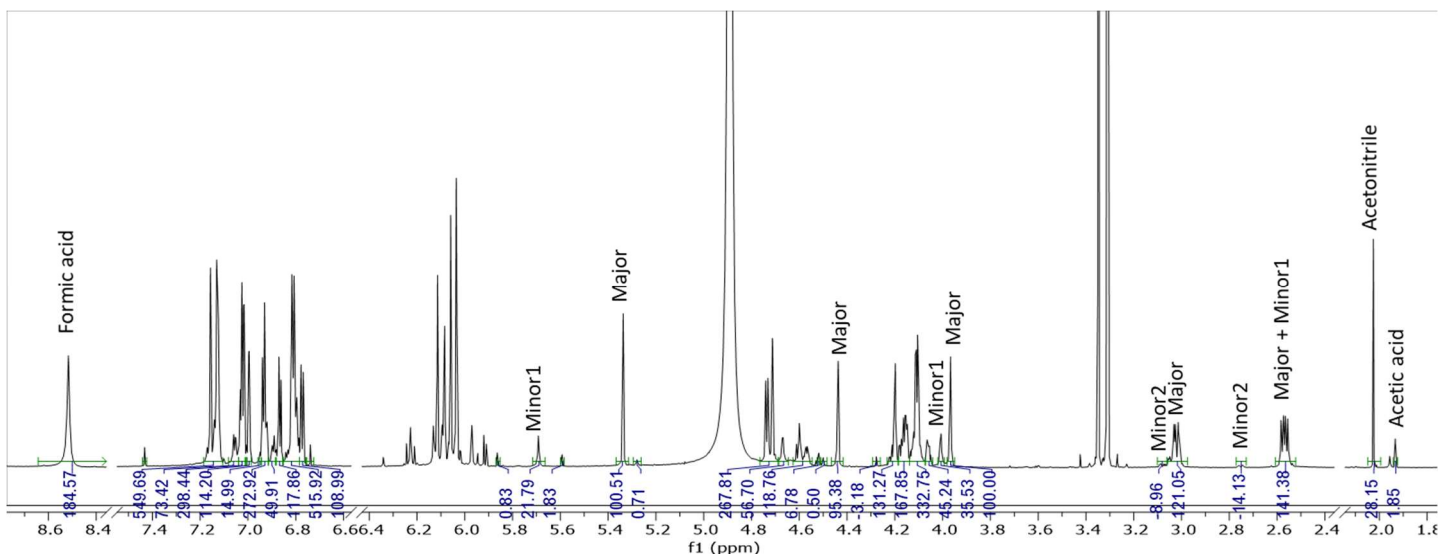

Cleanest integrals used for quantitation are labeled. The signals for H-6s and H-8s of the A rings are excluded from the calculation because of the H-D exchange reaction.

| B - Result                                                                                             |  | The Purity of the Compound 1 sample is 71.80%            |                    | minor 1                                                        | minor 2                             | acetic acid               | acetonitrile | formic acid                                                                                   | Impurity 6 |        |        |        |        |         |         |         |         |         |
|--------------------------------------------------------------------------------------------------------|--|----------------------------------------------------------|--------------------|----------------------------------------------------------------|-------------------------------------|---------------------------|--------------|-----------------------------------------------------------------------------------------------|------------|--------|--------|--------|--------|---------|---------|---------|---------|---------|
| C - Impurities                                                                                         |  | Read the amounts of impurities ---->                     |                    | 21.67                                                          | 0.92                                | 0.02                      | 0.24         | 5.35                                                                                          |            |        |        |        |        |         |         |         |         |         |
| $P [\%] = \frac{n_{Int_1} \cdot MW_1}{n_{Int_1} \cdot MW_1 + \sum_i (n_{Int_i} \cdot MW_i)} \cdot 100$ |  |                                                          |                    |                                                                |                                     |                           |              |                                                                                               |            |        |        |        |        |         |         |         |         |         |
| <b>STEP 1 Acquire &amp; Process the qHNMR spectrum</b>                                                 |  |                                                          |                    |                                                                |                                     |                           |              |                                                                                               |            |        |        |        |        |         |         |         |         |         |
| <b>STEPS 2 &amp; 3 Integration &amp; Selection of Purest Integral</b>                                  |  |                                                          |                    |                                                                |                                     |                           |              |                                                                                               |            |        |        |        |        |         |         |         |         |         |
| Target Analyte                                                                                         |  | Parameter                                                | Variable or Index  | Value                                                          | Purest Integral                     | All Other Integrals (Int) |              |                                                                                               |            |        |        |        |        |         |         |         |         |         |
|                                                                                                        |  | f                                                        | Compound 1         |                                                                | Int# 1 = Int                        | Int# 2                    | Int# 3       | Int# 4                                                                                        | Int# 5     | Int# 6 | Int# 7 | Int# 8 | Int# 9 | Int# 10 | Int# 11 | Int# 12 | Int# 13 | Int# 14 |
|                                                                                                        |  | Molecular Weight                                         | MW <sub>1</sub>    | 1150.24                                                        | 8 (ppm)                             | 1.93                      | 2.02         | 2.57                                                                                          | 5.28       | 3.02   | 5.59   | 4.01   | 4.44   | 5.34    | 5.69    | 8.52    |         |         |
|                                                                                                        |  | Total Number of Protons Giving Rise to Analyte Integrals | n <sub>1</sub>     | 100.00                                                         | Int                                 | 1.85                      | 28.15        | 141.38                                                                                        | 0.71       | 121.05 | 1.83   | 35.53  | 95.38  | 100.54  | 21.79   | 184.57  |         |         |
|                                                                                                        |  | Normalized Integral Value for 1H                         | Int <sub>1</sub>   | 99.18                                                          | n <sub>1</sub>                      | 3                         | 3            | 1                                                                                             | 1          | 1      | 1      | 1      | 1      | 1       | 1       | 1       |         |         |
| <p>Note: leave YELLOW fields blank for unused values; do not use zero!</p>                             |  |                                                          |                    |                                                                |                                     |                           |              |                                                                                               |            |        |        |        |        |         |         |         |         |         |
| <b>STEP 4 Assign Integrals to Analyte</b>                                                              |  |                                                          |                    |                                                                |                                     |                           |              |                                                                                               |            |        |        |        |        |         |         |         |         |         |
| Target Analyte (T)                                                                                     |  | Integral per 1H                                          | Calculated Purity  | P                                                              | 100.00                              | 100.00                    |              |                                                                                               |            | 100.00 | 95.38  | 100.54 |        |         |         |         |         |         |
| <p>Note: leave YELLOW fields blank for unused values; do not use zero!</p>                             |  |                                                          |                    |                                                                |                                     |                           |              |                                                                                               |            |        |        |        |        |         |         |         |         |         |
| <b>STEP 5 Assign All Integrals to All Species</b>                                                      |  |                                                          |                    |                                                                |                                     |                           |              |                                                                                               |            |        |        |        |        |         |         |         |         |         |
|                                                                                                        |  | 1=imp1.                                                  | Assign             |                                                                | 8 (ppm)                             | 1.93                      | 2.02         | 2.57                                                                                          | 5.28       | 3.02   | 5.59   | 4.01   | 4.44   | 5.34    | 5.69    | 8.52    |         |         |
|                                                                                                        |  | 2=imp2 etc.                                              |                    |                                                                | Int                                 | 1.85                      | 28.15        | 141.38                                                                                        | 0.71       | 121.05 | 1.83   | 35.53  | 95.38  | 100.54  | 21.79   | 184.57  |         |         |
|                                                                                                        |  |                                                          |                    |                                                                |                                     | 3                         | 4            | T,1                                                                                           | 2          | T,1    | 2      | 1      | T      | T       | 1       | 5       |         |         |
| <b>STEPS 6/7/8 Identify and Assign All Impurities</b>                                                  |  |                                                          |                    |                                                                |                                     |                           |              |                                                                                               |            |        |        |        |        |         |         |         |         |         |
|                                                                                                        |  | Step 6: Name & Determine Their MW                        |                    | Step 7: Break Down All Integrals into Subintegrals by Impurity |                                     |                           |              | Step 8: Assign # Protons from Each Impurity to Each Signal to Determine Total # of Protons of |            |        |        |        |        |         |         |         |         |         |
| Impurities                                                                                             |  |                                                          |                    |                                                                | 8 (ppm)                             | 1.93                      | 2.02         | 2.57                                                                                          | 5.28       | 3.02   | 5.59   | 4.01   | 4.44   | 5.34    | 5.69    | 8.52    |         |         |
|                                                                                                        |  |                                                          |                    |                                                                | Int                                 | 1.85                      | 28.15        | 141.38                                                                                        | 0.71       | 121.05 | 1.83   | 35.53  | 95.38  | 100.54  | 21.79   | 184.57  |         |         |
|                                                                                                        |  |                                                          |                    |                                                                | Breakdown Diff Check->              | 0.00                      | 0.00         | 0.00                                                                                          | 0.00       | 0.00   | 0.00   | 0.00   | 0.00   | 0.00    | 0.00    | 0.00    |         |         |
| Impurity #1                                                                                            |  | Imp1                                                     | minor 1            |                                                                | Integral Imp# 1 Int <sub>imp1</sub> | 41.38                     |              |                                                                                               |            | 21.05  |        | 35.53  |        |         |         | 21.79   |         |         |
|                                                                                                        |  | Molecular Weight                                         | MW <sub>imp1</sub> | 1150.24                                                        | # of Protons n <sub>1</sub>         | 1                         |              |                                                                                               |            | 1      |        | 1      |        |         | 1       |         |         |         |
|                                                                                                        |  | Normalized Integral Value for 1H                         | Int <sub>1</sub>   | 29.94                                                          | Integral per 1H-->                  | 41.38                     |              |                                                                                               |            | 21.05  |        | 35.53  |        |         | 21.79   |         |         |         |
|                                                                                                        |  | Calculated Impurity Content                              |                    | 21.67                                                          |                                     |                           |              |                                                                                               |            |        |        |        |        |         |         |         |         |         |
| Impurity #2                                                                                            |  | Imp2                                                     | minor 2            |                                                                | Integral Imp# 2 Int <sub>imp2</sub> |                           |              | 0.71                                                                                          |            | 1.83   |        |        |        |         |         |         |         |         |
|                                                                                                        |  | Molecular Weight                                         | MW <sub>imp2</sub> | 1150.24                                                        | # of Protons n <sub>2</sub>         |                           |              | 1                                                                                             |            | 1      |        |        |        |         |         |         |         |         |
|                                                                                                        |  | Normalized Integral Value for 1H                         | Int <sub>2</sub>   | 1.27                                                           | Integral per 1H-->                  |                           |              | 0.71                                                                                          |            | 1.83   |        |        |        |         |         |         |         |         |
|                                                                                                        |  | Calculated Impurity Content                              |                    | 0.92                                                           |                                     |                           |              |                                                                                               |            |        |        |        |        |         |         |         |         |         |
| Impurity #3                                                                                            |  | Imp3                                                     | acetic acid        |                                                                | Integral Imp# 3 Int <sub>imp3</sub> | 1.85                      |              |                                                                                               |            |        |        |        |        |         |         |         |         |         |
|                                                                                                        |  | Molecular Weight                                         | MW <sub>imp3</sub> | 60.05                                                          | # of Protons n <sub>3</sub>         | 3                         |              |                                                                                               |            |        |        |        |        |         |         |         |         |         |
|                                                                                                        |  | Normalized Integral Value for 1H                         | Int <sub>3</sub>   | 0.62                                                           | Integral per 1H-->                  |                           |              |                                                                                               |            |        |        |        |        |         |         |         |         |         |
|                                                                                                        |  | Calculated Impurity Content                              |                    | 0.02                                                           |                                     |                           |              |                                                                                               |            |        |        |        |        |         |         |         |         |         |
| Impurity #4                                                                                            |  | Imp4                                                     | acetonitrile       |                                                                | Integral Imp# 4 Int <sub>imp4</sub> |                           | 28.15        |                                                                                               |            |        |        |        |        |         |         |         |         |         |
|                                                                                                        |  | Molecular Weight                                         | MW <sub>imp4</sub> | 41.05                                                          | # of Protons n <sub>4</sub>         |                           | 3            |                                                                                               |            |        |        |        |        |         |         |         |         |         |
|                                                                                                        |  | Normalized Integral Value for 1H                         | Int <sub>4</sub>   | 9.38                                                           | Integral per 1H-->                  |                           | 9.38         |                                                                                               |            |        |        |        |        |         |         |         |         |         |
|                                                                                                        |  | Calculated Impurity Content                              |                    | 0.24                                                           |                                     |                           |              |                                                                                               |            |        |        |        |        |         |         |         |         |         |
| Impurity #5                                                                                            |  | Imp5                                                     | formic acid        |                                                                | Integral Imp# 5 Int <sub>imp5</sub> |                           |              |                                                                                               |            |        |        |        |        |         |         | 184.57  |         |         |
|                                                                                                        |  | Molecular Weight                                         | MW <sub>imp5</sub> | 46.03                                                          | # of Protons n <sub>5</sub>         |                           |              |                                                                                               |            |        |        |        |        |         | 1       |         |         |         |
|                                                                                                        |  | Normalized Integral Value for 1H                         | Int <sub>5</sub>   | 184.57                                                         | Integral per 1H-->                  |                           |              |                                                                                               |            |        |        |        |        |         | 184.57  |         |         |         |
|                                                                                                        |  | Calculated Impurity Content                              |                    | 5.35                                                           |                                     |                           |              |                                                                                               |            |        |        |        |        |         |         |         |         |         |

S28. Calculation of the purity of **2** by qHNMR using the 100% method.

| Composition  | Weight% |
|--------------|---------|
| Major        | 69.40   |
| Minor        | 19.18   |
| Ethanol      | 0.05    |
| Grease       | 0.08    |
| Acetonitrile | 11.30   |

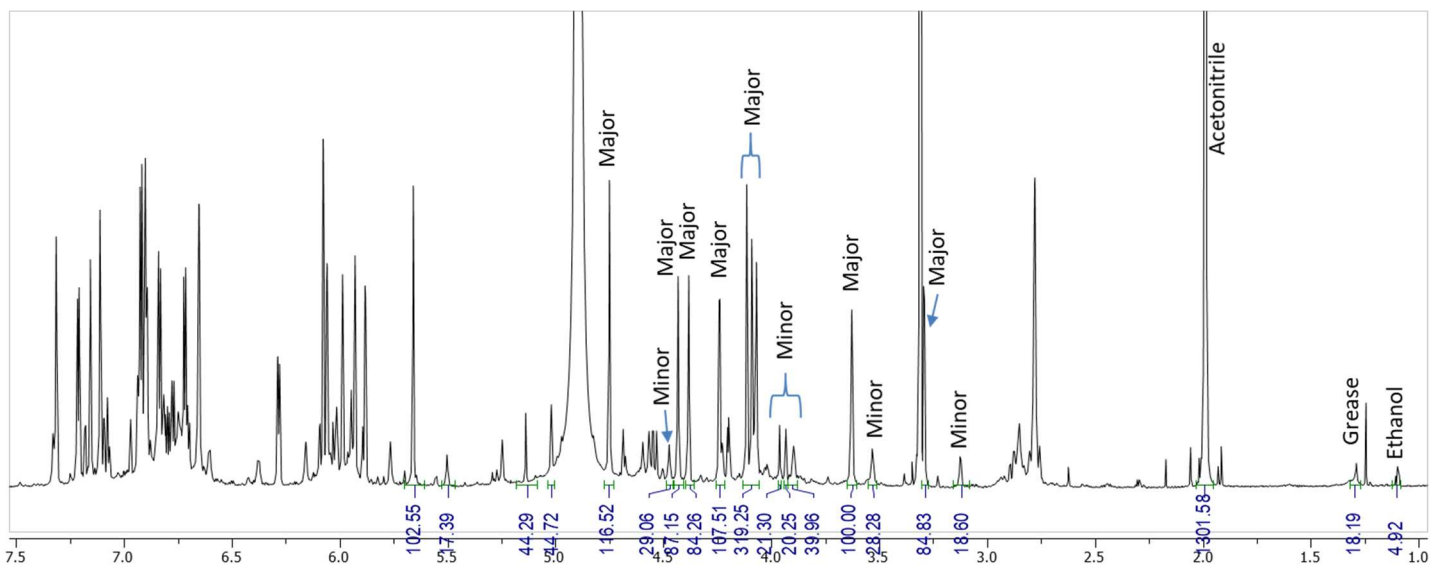

Cleanest integrals used for quantitation are labeled. The signals for H-6s and H-8s of the A rings are excluded from the calculation because of the H-D exchange reaction.

| B - Result                                                                                                                                                                                                                                                                                                                                                                                                                                                                                                                                                                                                                                                                                                                                                         |                    | The Purity of the Compound 2 sample is 69.40% |                                                                                                             | minor 1                   | ethanol | grease  | acetonitrile | Impurity 5 | Impurity 6 | Impurity 7 | Impurity 8 |         |         |         |         |         |         |         |     |      |      |      |      |      |      |      |      |     |      |       |         |      |       |       |       |       |      |        |       |       |       |       |        |        |   |   |   |   |   |   |   |   |   |   |   |   |   |   |   |
|--------------------------------------------------------------------------------------------------------------------------------------------------------------------------------------------------------------------------------------------------------------------------------------------------------------------------------------------------------------------------------------------------------------------------------------------------------------------------------------------------------------------------------------------------------------------------------------------------------------------------------------------------------------------------------------------------------------------------------------------------------------------|--------------------|-----------------------------------------------|-------------------------------------------------------------------------------------------------------------|---------------------------|---------|---------|--------------|------------|------------|------------|------------|---------|---------|---------|---------|---------|---------|---------|-----|------|------|------|------|------|------|------|------|-----|------|-------|---------|------|-------|-------|-------|-------|------|--------|-------|-------|-------|-------|--------|--------|---|---|---|---|---|---|---|---|---|---|---|---|---|---|---|
| C - Impurities                                                                                                                                                                                                                                                                                                                                                                                                                                                                                                                                                                                                                                                                                                                                                     |                    | Read the amounts of impurities --->           |                                                                                                             | 19.18                     | 0.05    | 0.08    | 11.30        |            |            |            |            |         |         |         |         |         |         |         |     |      |      |      |      |      |      |      |      |     |      |       |         |      |       |       |       |       |      |        |       |       |       |       |        |        |   |   |   |   |   |   |   |   |   |   |   |   |   |   |   |
| $P [\%] = \frac{nInt_2 \cdot MW_2}{nInt_2 \cdot MW_2 + \sum_1^n (nInt_{i_1} \cdot MW_{i_1})} \cdot 100$                                                                                                                                                                                                                                                                                                                                                                                                                                                                                                                                                                                                                                                            |                    |                                               |                                                                                                             |                           |         |         |              |            |            |            |            |         |         |         |         |         |         |         |     |      |      |      |      |      |      |      |      |     |      |       |         |      |       |       |       |       |      |        |       |       |       |       |        |        |   |   |   |   |   |   |   |   |   |   |   |   |   |   |   |
| <b>STEP 1 Acquire &amp; Process the qHNMR spectrum</b>                                                                                                                                                                                                                                                                                                                                                                                                                                                                                                                                                                                                                                                                                                             |                    |                                               |                                                                                                             |                           |         |         |              |            |            |            |            |         |         |         |         |         |         |         |     |      |      |      |      |      |      |      |      |     |      |       |         |      |       |       |       |       |      |        |       |       |       |       |        |        |   |   |   |   |   |   |   |   |   |   |   |   |   |   |   |
| <b>STEPS 2 &amp; 3 Integration &amp; Selection of Purest Integral</b>                                                                                                                                                                                                                                                                                                                                                                                                                                                                                                                                                                                                                                                                                              |                    |                                               |                                                                                                             |                           |         |         |              |            |            |            |            |         |         |         |         |         |         |         |     |      |      |      |      |      |      |      |      |     |      |       |         |      |       |       |       |       |      |        |       |       |       |       |        |        |   |   |   |   |   |   |   |   |   |   |   |   |   |   |   |
| Target Analyte                                                                                                                                                                                                                                                                                                                                                                                                                                                                                                                                                                                                                                                                                                                                                     | N #                | Compound 2                                    | Purest Integral                                                                                             | All Other Integrals (Int) |         |         |              |            |            |            |            |         |         |         |         |         |         |         |     |      |      |      |      |      |      |      |      |     |      |       |         |      |       |       |       |       |      |        |       |       |       |       |        |        |   |   |   |   |   |   |   |   |   |   |   |   |   |   |   |
| Molecular Weight                                                                                                                                                                                                                                                                                                                                                                                                                                                                                                                                                                                                                                                                                                                                                   | MW <sub>2</sub>    | 1152.25                                       | 363                                                                                                         | Int# 2                    | Int# 3  | Int# 4  | Int# 5       | Int# 6     | Int# 7     | Int# 8     | Int# 9     | Int# 10 | Int# 11 | Int# 12 | Int# 13 | Int# 14 | Int# 15 | Int# 16 |     |      |      |      |      |      |      |      |      |     |      |       |         |      |       |       |       |       |      |        |       |       |       |       |        |        |   |   |   |   |   |   |   |   |   |   |   |   |   |   |   |
| Total Number of Protons Giving Rise to Analytes                                                                                                                                                                                                                                                                                                                                                                                                                                                                                                                                                                                                                                                                                                                    | n <sub>2</sub>     | 51                                            | 100.00                                                                                                      | 1.10                      | 1.30    | 1.99    | 3.13         | 3.29       | 3.53       | 3.90       | 3.93       | 3.96    | 4.09    | 4.24    | 4.38    | 4.43    | 4.48    | 4.75    |     |      |      |      |      |      |      |      |      |     |      |       |         |      |       |       |       |       |      |        |       |       |       |       |        |        |   |   |   |   |   |   |   |   |   |   |   |   |   |   |   |
| Normalized Integral Value for 1H                                                                                                                                                                                                                                                                                                                                                                                                                                                                                                                                                                                                                                                                                                                                   | Int <sub>2</sub>   | 94.96                                         | 1                                                                                                           | 4.92                      | 18.19   | 1301.58 | 18.60        | 84.83      | 28.28      | 39.96      | 20.25      | 21.30   | 319.25  | 85.57   | 84.26   | 87.15   | 29.06   | 116.52  |     |      |      |      |      |      |      |      |      |     |      |       |         |      |       |       |       |       |      |        |       |       |       |       |        |        |   |   |   |   |   |   |   |   |   |   |   |   |   |   |   |
| Note: leave YELLOW fields blank for unused values; do not use zero!                                                                                                                                                                                                                                                                                                                                                                                                                                                                                                                                                                                                                                                                                                |                    |                                               |                                                                                                             |                           |         |         |              |            |            |            |            |         |         |         |         |         |         |         |     |      |      |      |      |      |      |      |      |     |      |       |         |      |       |       |       |       |      |        |       |       |       |       |        |        |   |   |   |   |   |   |   |   |   |   |   |   |   |   |   |
| <b>STEP 4 Assign Integrals to Analyte</b>                                                                                                                                                                                                                                                                                                                                                                                                                                                                                                                                                                                                                                                                                                                          |                    |                                               |                                                                                                             |                           |         |         |              |            |            |            |            |         |         |         |         |         |         |         |     |      |      |      |      |      |      |      |      |     |      |       |         |      |       |       |       |       |      |        |       |       |       |       |        |        |   |   |   |   |   |   |   |   |   |   |   |   |   |   |   |
| Target Analyte (T)                                                                                                                                                                                                                                                                                                                                                                                                                                                                                                                                                                                                                                                                                                                                                 | Integral per 1H    | 100.00                                        | 100.00                                                                                                      | Int# 2                    | Int# 3  | Int# 4  | Int# 5       | Int# 6     | Int# 7     | Int# 8     | Int# 9     | Int# 10 | Int# 11 | Int# 12 | Int# 13 | Int# 14 | Int# 15 | Int# 16 |     |      |      |      |      |      |      |      |      |     |      |       |         |      |       |       |       |       |      |        |       |       |       |       |        |        |   |   |   |   |   |   |   |   |   |   |   |   |   |   |   |
| Calculated Purity                                                                                                                                                                                                                                                                                                                                                                                                                                                                                                                                                                                                                                                                                                                                                  | P                  | 69.40                                         |                                                                                                             | 84.83                     |         |         |              | 84.83      |            |            |            |         | 106.42  | 85.57   | 84.26   | 87.15   | 116.52  |         |     |      |      |      |      |      |      |      |      |     |      |       |         |      |       |       |       |       |      |        |       |       |       |       |        |        |   |   |   |   |   |   |   |   |   |   |   |   |   |   |   |
| Note: leave YELLOW fields blank for unused values; do not use zero!                                                                                                                                                                                                                                                                                                                                                                                                                                                                                                                                                                                                                                                                                                |                    |                                               |                                                                                                             |                           |         |         |              |            |            |            |            |         |         |         |         |         |         |         |     |      |      |      |      |      |      |      |      |     |      |       |         |      |       |       |       |       |      |        |       |       |       |       |        |        |   |   |   |   |   |   |   |   |   |   |   |   |   |   |   |
| <b>STEP 5 Assign All Integrals to All Species</b>                                                                                                                                                                                                                                                                                                                                                                                                                                                                                                                                                                                                                                                                                                                  |                    |                                               |                                                                                                             |                           |         |         |              |            |            |            |            |         |         |         |         |         |         |         |     |      |      |      |      |      |      |      |      |     |      |       |         |      |       |       |       |       |      |        |       |       |       |       |        |        |   |   |   |   |   |   |   |   |   |   |   |   |   |   |   |
| <table border="1"> <thead> <tr> <th>δ (ppm)</th> <th>1.1</th> <th>1.3</th> <th>1.99</th> <th>3.13</th> <th>3.29</th> <th>3.53</th> <th>3.9</th> <th>3.93</th> <th>3.96</th> <th>4.09</th> <th>4.24</th> <th>4.38</th> <th>4.43</th> <th>4.48</th> <th>4.75</th> </tr> </thead> <tbody> <tr> <td>Int</td> <td>4.92</td> <td>18.19</td> <td>1301.58</td> <td>18.6</td> <td>84.83</td> <td>28.28</td> <td>39.96</td> <td>20.25</td> <td>21.3</td> <td>319.25</td> <td>85.57</td> <td>84.26</td> <td>87.15</td> <td>29.06</td> <td>116.52</td> </tr> <tr> <td>Assign</td> <td>2</td> <td>3</td> <td>4</td> <td>1</td> <td>T</td> <td>1</td> <td>1</td> <td>1</td> <td>1</td> <td>T</td> <td>T</td> <td>T</td> <td>T</td> <td>1</td> <td>T</td> </tr> </tbody> </table> |                    |                                               |                                                                                                             |                           |         |         |              |            |            |            |            | δ (ppm) | 1.1     | 1.3     | 1.99    | 3.13    | 3.29    | 3.53    | 3.9 | 3.93 | 3.96 | 4.09 | 4.24 | 4.38 | 4.43 | 4.48 | 4.75 | Int | 4.92 | 18.19 | 1301.58 | 18.6 | 84.83 | 28.28 | 39.96 | 20.25 | 21.3 | 319.25 | 85.57 | 84.26 | 87.15 | 29.06 | 116.52 | Assign | 2 | 3 | 4 | 1 | T | 1 | 1 | 1 | 1 | T | T | T | T | 1 | T |
| δ (ppm)                                                                                                                                                                                                                                                                                                                                                                                                                                                                                                                                                                                                                                                                                                                                                            | 1.1                | 1.3                                           | 1.99                                                                                                        | 3.13                      | 3.29    | 3.53    | 3.9          | 3.93       | 3.96       | 4.09       | 4.24       | 4.38    | 4.43    | 4.48    | 4.75    |         |         |         |     |      |      |      |      |      |      |      |      |     |      |       |         |      |       |       |       |       |      |        |       |       |       |       |        |        |   |   |   |   |   |   |   |   |   |   |   |   |   |   |   |
| Int                                                                                                                                                                                                                                                                                                                                                                                                                                                                                                                                                                                                                                                                                                                                                                | 4.92               | 18.19                                         | 1301.58                                                                                                     | 18.6                      | 84.83   | 28.28   | 39.96        | 20.25      | 21.3       | 319.25     | 85.57      | 84.26   | 87.15   | 29.06   | 116.52  |         |         |         |     |      |      |      |      |      |      |      |      |     |      |       |         |      |       |       |       |       |      |        |       |       |       |       |        |        |   |   |   |   |   |   |   |   |   |   |   |   |   |   |   |
| Assign                                                                                                                                                                                                                                                                                                                                                                                                                                                                                                                                                                                                                                                                                                                                                             | 2                  | 3                                             | 4                                                                                                           | 1                         | T       | 1       | 1            | 1          | 1          | T          | T          | T       | T       | 1       | T       |         |         |         |     |      |      |      |      |      |      |      |      |     |      |       |         |      |       |       |       |       |      |        |       |       |       |       |        |        |   |   |   |   |   |   |   |   |   |   |   |   |   |   |   |
| <b>STEPS 6/7/8 Identify and Assign All Impurities</b>                                                                                                                                                                                                                                                                                                                                                                                                                                                                                                                                                                                                                                                                                                              |                    |                                               |                                                                                                             |                           |         |         |              |            |            |            |            |         |         |         |         |         |         |         |     |      |      |      |      |      |      |      |      |     |      |       |         |      |       |       |       |       |      |        |       |       |       |       |        |        |   |   |   |   |   |   |   |   |   |   |   |   |   |   |   |
| Step 6: Name & Determine Their MW                                                                                                                                                                                                                                                                                                                                                                                                                                                                                                                                                                                                                                                                                                                                  |                    |                                               | Step 7: Break Down All Integrals into Subintegrals by Impurity                                              |                           |         |         |              |            |            |            |            |         |         |         |         |         |         |         |     |      |      |      |      |      |      |      |      |     |      |       |         |      |       |       |       |       |      |        |       |       |       |       |        |        |   |   |   |   |   |   |   |   |   |   |   |   |   |   |   |
| Impurities                                                                                                                                                                                                                                                                                                                                                                                                                                                                                                                                                                                                                                                                                                                                                         |                    |                                               | Step 8: Assign # Protons from Each Impurity to Each Signal to Determine Total # of Protons of Each Impurity |                           |         |         |              |            |            |            |            |         |         |         |         |         |         |         |     |      |      |      |      |      |      |      |      |     |      |       |         |      |       |       |       |       |      |        |       |       |       |       |        |        |   |   |   |   |   |   |   |   |   |   |   |   |   |   |   |
| Impurity #1                                                                                                                                                                                                                                                                                                                                                                                                                                                                                                                                                                                                                                                                                                                                                        | Imp1               | minor 1                                       | Int# 2                                                                                                      | Int# 3                    | Int# 4  | Int# 5  | Int# 6       | Int# 7     | Int# 8     | Int# 9     | Int# 10    | Int# 11 | Int# 12 | Int# 13 | Int# 14 | Int# 15 | Int# 16 |         |     |      |      |      |      |      |      |      |      |     |      |       |         |      |       |       |       |       |      |        |       |       |       |       |        |        |   |   |   |   |   |   |   |   |   |   |   |   |   |   |   |
| Molecular Weight                                                                                                                                                                                                                                                                                                                                                                                                                                                                                                                                                                                                                                                                                                                                                   | MW <sub>imp1</sub> | 1152.25                                       | 18.6                                                                                                        |                           |         |         | 28.28        | 39.96      | 20.25      | 21.3       |            |         |         |         |         |         | 29.06   |         |     |      |      |      |      |      |      |      |      |     |      |       |         |      |       |       |       |       |      |        |       |       |       |       |        |        |   |   |   |   |   |   |   |   |   |   |   |   |   |   |   |
| Normalized Integral Value for 1H                                                                                                                                                                                                                                                                                                                                                                                                                                                                                                                                                                                                                                                                                                                                   | Int <sub>1</sub>   | 26.24                                         | 1                                                                                                           |                           |         |         | 1            | 1          | 1          | 1          |            |         |         |         |         |         | 1       |         |     |      |      |      |      |      |      |      |      |     |      |       |         |      |       |       |       |       |      |        |       |       |       |       |        |        |   |   |   |   |   |   |   |   |   |   |   |   |   |   |   |
| Calculated Impurity Content                                                                                                                                                                                                                                                                                                                                                                                                                                                                                                                                                                                                                                                                                                                                        |                    | 19.18                                         | 18.60                                                                                                       |                           |         |         | 28.28        | 39.96      | 20.25      | 21.30      |            |         |         |         |         |         | 29.06   |         |     |      |      |      |      |      |      |      |      |     |      |       |         |      |       |       |       |       |      |        |       |       |       |       |        |        |   |   |   |   |   |   |   |   |   |   |   |   |   |   |   |
| Impurity #2                                                                                                                                                                                                                                                                                                                                                                                                                                                                                                                                                                                                                                                                                                                                                        | Imp2               | ethanol                                       | 4.92                                                                                                        |                           |         |         |              |            |            |            |            |         |         |         |         |         |         |         |     |      |      |      |      |      |      |      |      |     |      |       |         |      |       |       |       |       |      |        |       |       |       |       |        |        |   |   |   |   |   |   |   |   |   |   |   |   |   |   |   |
| Molecular Weight                                                                                                                                                                                                                                                                                                                                                                                                                                                                                                                                                                                                                                                                                                                                                   | MW <sub>imp2</sub> | 46.07                                         | 3                                                                                                           |                           |         |         |              |            |            |            |            |         |         |         |         |         |         |         |     |      |      |      |      |      |      |      |      |     |      |       |         |      |       |       |       |       |      |        |       |       |       |       |        |        |   |   |   |   |   |   |   |   |   |   |   |   |   |   |   |
| Normalized Integral Value for 1H                                                                                                                                                                                                                                                                                                                                                                                                                                                                                                                                                                                                                                                                                                                                   | Int <sub>2</sub>   | 1.64                                          | 1.64                                                                                                        |                           |         |         |              |            |            |            |            |         |         |         |         |         |         |         |     |      |      |      |      |      |      |      |      |     |      |       |         |      |       |       |       |       |      |        |       |       |       |       |        |        |   |   |   |   |   |   |   |   |   |   |   |   |   |   |   |
| Calculated Impurity Content                                                                                                                                                                                                                                                                                                                                                                                                                                                                                                                                                                                                                                                                                                                                        |                    | 0.05                                          |                                                                                                             |                           |         |         |              |            |            |            |            |         |         |         |         |         |         |         |     |      |      |      |      |      |      |      |      |     |      |       |         |      |       |       |       |       |      |        |       |       |       |       |        |        |   |   |   |   |   |   |   |   |   |   |   |   |   |   |   |
| Impurity #3                                                                                                                                                                                                                                                                                                                                                                                                                                                                                                                                                                                                                                                                                                                                                        | Imp3               | grease                                        | 18.19                                                                                                       |                           |         |         |              |            |            |            |            |         |         |         |         |         |         |         |     |      |      |      |      |      |      |      |      |     |      |       |         |      |       |       |       |       |      |        |       |       |       |       |        |        |   |   |   |   |   |   |   |   |   |   |   |   |   |   |   |
| Molecular Weight                                                                                                                                                                                                                                                                                                                                                                                                                                                                                                                                                                                                                                                                                                                                                   | MW <sub>imp3</sub> | 200.00                                        | 30                                                                                                          |                           |         |         |              |            |            |            |            |         |         |         |         |         |         |         |     |      |      |      |      |      |      |      |      |     |      |       |         |      |       |       |       |       |      |        |       |       |       |       |        |        |   |   |   |   |   |   |   |   |   |   |   |   |   |   |   |
| Normalized Integral Value for 1H                                                                                                                                                                                                                                                                                                                                                                                                                                                                                                                                                                                                                                                                                                                                   | Int <sub>3</sub>   | 0.61                                          | 0.61                                                                                                        |                           |         |         |              |            |            |            |            |         |         |         |         |         |         |         |     |      |      |      |      |      |      |      |      |     |      |       |         |      |       |       |       |       |      |        |       |       |       |       |        |        |   |   |   |   |   |   |   |   |   |   |   |   |   |   |   |
| Calculated Impurity Content                                                                                                                                                                                                                                                                                                                                                                                                                                                                                                                                                                                                                                                                                                                                        |                    | 0.08                                          |                                                                                                             |                           |         |         |              |            |            |            |            |         |         |         |         |         |         |         |     |      |      |      |      |      |      |      |      |     |      |       |         |      |       |       |       |       |      |        |       |       |       |       |        |        |   |   |   |   |   |   |   |   |   |   |   |   |   |   |   |
| Impurity #4                                                                                                                                                                                                                                                                                                                                                                                                                                                                                                                                                                                                                                                                                                                                                        | Imp4               | acetonitrile                                  | 1301.58                                                                                                     |                           |         |         |              |            |            |            |            |         |         |         |         |         |         |         |     |      |      |      |      |      |      |      |      |     |      |       |         |      |       |       |       |       |      |        |       |       |       |       |        |        |   |   |   |   |   |   |   |   |   |   |   |   |   |   |   |
| Molecular Weight                                                                                                                                                                                                                                                                                                                                                                                                                                                                                                                                                                                                                                                                                                                                                   | MW <sub>imp4</sub> | 41.05                                         | 3                                                                                                           |                           |         |         |              |            |            |            |            |         |         |         |         |         |         |         |     |      |      |      |      |      |      |      |      |     |      |       |         |      |       |       |       |       |      |        |       |       |       |       |        |        |   |   |   |   |   |   |   |   |   |   |   |   |   |   |   |
| Normalized Integral Value for 1H                                                                                                                                                                                                                                                                                                                                                                                                                                                                                                                                                                                                                                                                                                                                   | Int <sub>4</sub>   | 433.86                                        | 433.86                                                                                                      |                           |         |         |              |            |            |            |            |         |         |         |         |         |         |         |     |      |      |      |      |      |      |      |      |     |      |       |         |      |       |       |       |       |      |        |       |       |       |       |        |        |   |   |   |   |   |   |   |   |   |   |   |   |   |   |   |
| Calculated Impurity Content                                                                                                                                                                                                                                                                                                                                                                                                                                                                                                                                                                                                                                                                                                                                        |                    | 11.30                                         |                                                                                                             |                           |         |         |              |            |            |            |            |         |         |         |         |         |         |         |     |      |      |      |      |      |      |      |      |     |      |       |         |      |       |       |       |       |      |        |       |       |       |       |        |        |   |   |   |   |   |   |   |   |   |   |   |   |   |   |   |



S29. Calculation of the purity of 3 by qHNMR using the 100% method.

| Composition  | Weight% |
|--------------|---------|
| Major        | 70.32   |
| Minor        | 20.01   |
| Formic acid  | 9.37    |
| Acetonitrile | 0.32    |

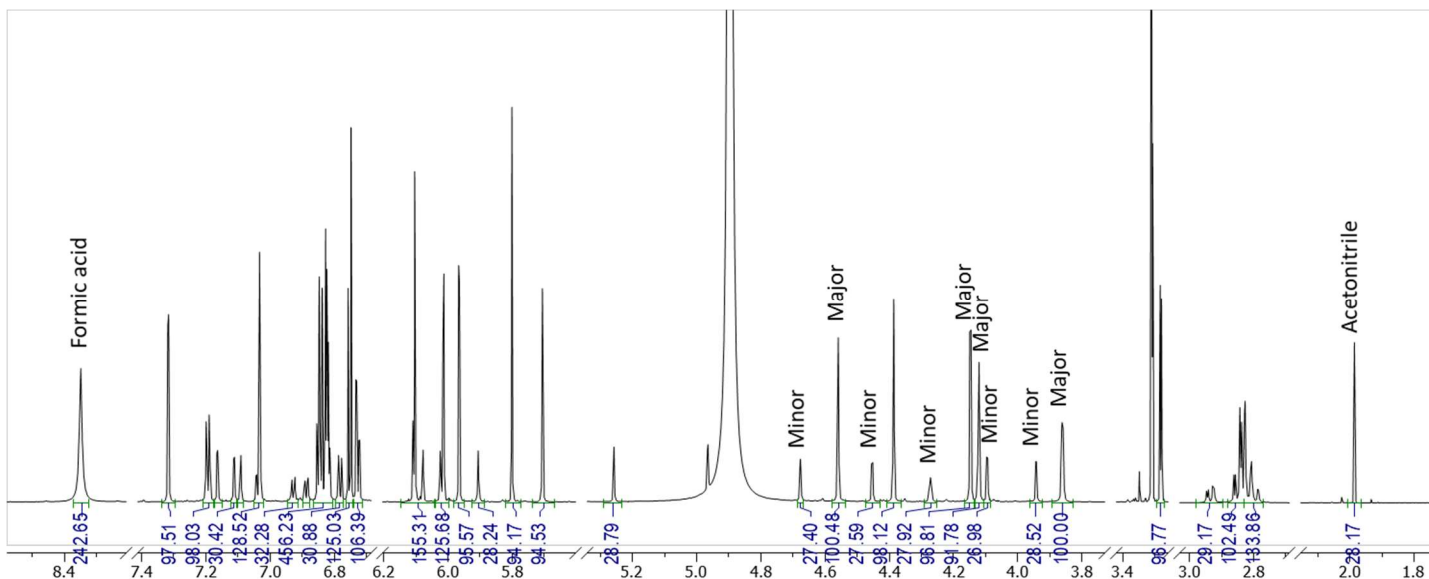

Cleanest integrals used for quantitation are labeled. The signals for H-6s and H-8s of the A rings are excluded from the calculation because of the H-D exchange reaction.

| $P [\%] = \frac{nInt_t \cdot MW_t}{nInt_t \cdot MW_t + \sum_i^n (nInt_{i_t} \cdot MW_{i_t})} \cdot 100$ |                                  | B - Result                                    |                                   |                                                                |                           |            |            |        |                                                                                    |        |        |        |         |         |        |
|---------------------------------------------------------------------------------------------------------|----------------------------------|-----------------------------------------------|-----------------------------------|----------------------------------------------------------------|---------------------------|------------|------------|--------|------------------------------------------------------------------------------------|--------|--------|--------|---------|---------|--------|
|                                                                                                         |                                  | The Purity of the Compound 3 sample is 70.32% | minor 1                           | acetonitrile                                                   | formic acid               | Impurity 4 | Impurity 5 | Im     |                                                                                    |        |        |        |         |         |        |
|                                                                                                         |                                  | C - Impurities                                | 20.01                             | 0.32                                                           | 9.37                      |            |            |        |                                                                                    |        |        |        |         |         |        |
| <b>STEP 1 Acquire &amp; Process the qHNMR spectrum</b>                                                  |                                  |                                               |                                   |                                                                |                           |            |            |        |                                                                                    |        |        |        |         |         |        |
| <b>STEPS 2 &amp; 3 Integration &amp; Selection of Purest Integral</b>                                   |                                  |                                               |                                   |                                                                |                           |            |            |        |                                                                                    |        |        |        |         |         |        |
| Target Analyte                                                                                          | Parameter                        | Variable or Index                             | Value                             | Purest Integral                                                | All Other Integrals (Int) |            |            |        |                                                                                    |        |        |        |         |         |        |
|                                                                                                         | N                                | t                                             | Compound 3                        | Int# 1 = Int <sub>1</sub>                                      | Int# 2                    | Int# 3     | Int# 4     | Int# 5 | Int# 6                                                                             | Int# 7 | Int# 8 | Int# 9 | Int# 10 | Int# 11 | Int# 1 |
|                                                                                                         | Molecular Weight                 | MW <sub>t</sub>                               | 864.19                            | 3.86                                                           | 1.99                      | 3.94       | 4.09       | 4.12   | 4.15                                                                               | 4.27   | 4.45   | 4.56   | 4.68    | 8.35    |        |
| Total Number of Protons Giving Rise to Analytes Integral(s)                                             | n <sub>t</sub>                   |                                               | 13                                | 100.00                                                         | 28.17                     | 28.52      | 26.98      | 91.78  | 96.81                                                                              | 27.92  | 27.59  | 100.48 | 27.4    | 242.59  |        |
| Normalized Integral Value for 1H                                                                        | Int <sub>t</sub>                 |                                               | 97.27                             | 1                                                              | 3                         | 1          | 1          | 1      | 1                                                                                  | 1      | 1      | 1      | 1       | 1       |        |
| <b>STEP 4 Assign Integrals to Analyte</b>                                                               |                                  |                                               |                                   |                                                                |                           |            |            |        |                                                                                    |        |        |        |         |         |        |
| Target Analyte (T)                                                                                      | Integral per 1H                  |                                               | 100.00                            | 100.00                                                         |                           |            |            |        |                                                                                    |        |        |        |         |         |        |
|                                                                                                         | Calculated Purity P              |                                               | 70.32                             |                                                                |                           |            |            | 91.78  | 96.81                                                                              |        |        | 100.48 |         |         |        |
| <b>STEP 5 Assign All Integrals to All Species</b>                                                       |                                  |                                               |                                   |                                                                |                           |            |            |        |                                                                                    |        |        |        |         |         |        |
|                                                                                                         |                                  |                                               |                                   | δ (ppm)                                                        | 1.99                      | 3.94       | 4.09       | 4.12   | 4.15                                                                               | 4.27   | 4.45   | 4.56   | 4.68    | 8.35    |        |
|                                                                                                         |                                  |                                               |                                   | Int                                                            | 28.17                     | 28.52      | 26.98      | 91.78  | 96.81                                                                              | 27.92  | 27.59  | 100.48 | 27.4    | 242.59  |        |
|                                                                                                         |                                  |                                               |                                   | 1=Imp1, 2=Imp2 etc.                                            | 2                         | 1          | 1          | T      | T                                                                                  | 1      | 1      | T      | 1       | 3       |        |
| <b>STEPS 6/7/8 Identify and Assign All Impurities</b>                                                   |                                  |                                               |                                   |                                                                |                           |            |            |        |                                                                                    |        |        |        |         |         |        |
|                                                                                                         |                                  |                                               | Step 6: Name & Determine Their MW | Step 7: Break Down All Integrals into Subintegrals by Impurity |                           |            |            |        | Step 8: Assign # Protons from Each Impurity to Each Signal to Determine Total # of |        |        |        |         |         |        |
| Impurities                                                                                              |                                  |                                               |                                   | δ (ppm)                                                        | 1.99                      | 3.94       | 4.09       | 4.12   | 4.15                                                                               | 4.27   | 4.45   | 4.56   | 4.68    | 8.35    |        |
|                                                                                                         |                                  |                                               |                                   | Int                                                            | 28.17                     | 28.52      | 26.98      | 91.78  | 96.81                                                                              | 27.92  | 27.59  | 100.48 | 27.4    | 242.59  |        |
|                                                                                                         |                                  |                                               |                                   | Breakdown Diff Check ->                                        | 0.00                      | 0.00       | 0.00       | 0.00   | 0.00                                                                               | 0.00   | 0.00   | 0.00   | 0.00    | 0.00    | 0.00   |
| Impurity #1                                                                                             | Imp1                             | minor 1                                       |                                   | Integral Imp# 1 Int <sub>imp1</sub>                            | 28.52                     | 26.98      |            |        | 27.92                                                                              | 27.59  |        |        |         | 27.4    |        |
|                                                                                                         | Molecular Weight                 | MW <sub>imp1</sub>                            | 864.19                            | #of Protons n <sub>1</sub>                                     | 1                         | 1          |            |        | 1                                                                                  | 1      |        |        |         | 1       |        |
|                                                                                                         | Normalized Integral Value for 1H | Int <sub>1</sub>                              | 27.68                             | Integral per 1H-->                                             | 28.52                     | 26.98      |            |        | 27.92                                                                              | 27.59  |        |        |         | 27.40   |        |
|                                                                                                         | Calculated Impurity Content      |                                               | 20.01                             |                                                                |                           |            |            |        |                                                                                    |        |        |        |         |         |        |
| Impurity #2                                                                                             | Imp2                             | acetonitrile                                  |                                   | Integral Imp# 2 Int <sub>imp2</sub>                            | 28.17                     |            |            |        |                                                                                    |        |        |        |         |         |        |
|                                                                                                         | Molecular Weight                 | MW <sub>imp2</sub>                            | 41.05                             | #of Protons n <sub>2</sub>                                     | 3                         |            |            |        |                                                                                    |        |        |        |         |         |        |
|                                                                                                         | Normalized Integral Value for 1H | Int <sub>2</sub>                              | 9.39                              | Integral per 1H-->                                             | 9.39                      |            |            |        |                                                                                    |        |        |        |         |         |        |
|                                                                                                         | Calculated Impurity Content      |                                               | 0.32                              |                                                                |                           |            |            |        |                                                                                    |        |        |        |         |         |        |
| Impurity #3                                                                                             | Imp3                             | formic acid                                   |                                   | Integral Imp# 3 Int <sub>imp3</sub>                            |                           |            |            |        |                                                                                    |        |        |        |         | 242.59  |        |
|                                                                                                         | Molecular Weight                 | MW <sub>imp3</sub>                            | 46.03                             | #of Protons n <sub>3</sub>                                     |                           |            |            |        |                                                                                    |        |        |        |         | 1       |        |
|                                                                                                         | Normalized Integral Value for 1H | Int <sub>3</sub>                              | 242.59                            | Integral per 1H-->                                             |                           |            |            |        |                                                                                    |        |        |        |         | 242.59  |        |
|                                                                                                         | Calculated Impurity Content      |                                               | 9.37                              |                                                                |                           |            |            |        |                                                                                    |        |        |        |         |         |        |
